# Supplementary material for: Cycloartane and Oleanane Glycosides from the Tubers of Eranthis cilicica
Source: MDPI journal article supplement (doi:10.3390/molecules24010069), 2018-12-25

# Cycloartane and Oleanane Glycosides from the Tubers of *Eranthis cilicica*

Kazuki Watanabe <sup>1</sup>, Yoshihiro Mimaki <sup>2</sup>, Haruhiko Fukaya <sup>2</sup>, and Yukiko Matsuo <sup>2,\*</sup>

**Supplementary Materials:** All NMR spectra of **1**, **1a**, **2-8**, **8a**, and **9-13** are available online.

**Table 1.** <sup>1</sup>H-NMR spectral data for compounds **1-7**, and **1a** in C<sub>5</sub>D<sub>5</sub>N

**Table 2.** <sup>1</sup>H-NMR spectral data for compounds **8-11**, and **8a** in C<sub>5</sub>D<sub>5</sub>N

NMR spectra of **1** in C<sub>5</sub>D<sub>5</sub>N\_ page 3

NMR spectra of **1a** in C<sub>5</sub>D<sub>5</sub>N\_ page 9

NMR spectra of **2** in C<sub>5</sub>D<sub>5</sub>N\_ page 15

NMR spectra of **3** in C<sub>5</sub>D<sub>5</sub>N\_ page 21

NMR spectra of **4** in C<sub>5</sub>D<sub>5</sub>N\_ page 27

NMR spectra of **5** in C<sub>5</sub>D<sub>5</sub>N\_ page 34

NMR spectra of **6** in C<sub>5</sub>D<sub>5</sub>N\_ page 40

NMR spectra of **7** in C<sub>5</sub>D<sub>5</sub>N\_ page 47

NMR spectra of **8** in C<sub>5</sub>D<sub>5</sub>N\_ page 53

NMR spectra of **8a** in C<sub>5</sub>D<sub>5</sub>N\_ page 60

NMR spectra of **9** in C<sub>5</sub>D<sub>5</sub>N\_ page 66

NMR spectra of **10** in C<sub>5</sub>D<sub>5</sub>N\_ page 73

NMR spectra of **11** in C<sub>5</sub>D<sub>5</sub>N\_ page 79

NMR spectra of **13** in C<sub>5</sub>D<sub>5</sub>N\_ page 86

**Table 1.** <sup>1</sup>H-NMR spectral data for compounds **1–7**, and **1a** in C<sub>5</sub>D<sub>5</sub>N

|     | <b>1</b>       |               | <b>1a</b>      |               | <b>2</b>       |               | <b>3</b>       |               | <b>4</b>       |                 | <b>5</b>       |               | <b>6</b>       |               | <b>7</b>       |                 |
|-----|----------------|---------------|----------------|---------------|----------------|---------------|----------------|---------------|----------------|-----------------|----------------|---------------|----------------|---------------|----------------|-----------------|
|     | <sup>1</sup> H | <i>J</i> (Hz)   | <sup>1</sup> H | <i>J</i> (Hz) | <sup>1</sup> H | <i>J</i> (Hz) | <sup>1</sup> H | <i>J</i> (Hz)   |
| 1   | 1.42 m         |               | 1.53 m         |               | 1.42 m         |               | 1.38 m         |               | 1.60 m         |                 | 1.44 m         |               | 1.47 m         |               | 1.65 ddd       | 13.4, 13.0, 3.0 |
|     | 1.08 m         |               | 1.22 m         |               | 1.08 m         |               | 1.04 m         |               | 1.20 m         |                 | 1.06 m         |               | 1.18 m         |               | 1.23 m         |                 |
| 2   | 2.37 m         |               | 1.97 m         |               | 2.27 m         |               | 2.28 m         |               | 2.48 m         |                 | 2.28 m         |               | 2.32 m         |               | 2.54 m         |                 |
|     | 1.85 m         |               | 1.86 m         |               | 1.81 m         |               | 1.78 m         |               | 1.89 m         |                 | 1.77 m         |               | 1.81 m         |               | 1.93 m         |                 |
| 3   | 3.46 dd        | 11.7, 4.3     | 3.48 dd        | 11.5, 4.5     | 3.40 dd        | 11.7, 4.3     | 3.40 dd        | 11.7, 4.3     | 3.44 dd        | 11.6, 4.3       | 3.38 dd        | 11.6, 4.2     | 3.41 dd        | 11.7, 4.3     | 3.52 dd        | 11.6, 4.3       |
| 5   | 1.23 dd        | 12.7, 3.7     | 1.28 dd        | 12.9, 3.6     | 1.24 dd        | 12.7, 3.8     | 1.20 dd        | 12.6, 4.0     | 1.17 dd        | 12.4, 3.6       | 1.19 m         |               | 1.17 dd        | 11.9, 4.3     | 1.20 m         |                 |
| 6   | 1.44 m         |               | 1.52 m         |               | 1.44 m         |               | 1.28 m         |               | 1.39 m         |                 | 1.42 m         |               | 1.31 m         |               | 1.39 m         |                 |
|     | 0.56 qd-like   | 11.1, 2.9     | 0.66 qd-like   | 12.1, 2.1     | 0.57 qd-like   | 11.2, 3.5     | 0.54 qd-like   | 10.9, 2.7     | 0.53 qd-like   | 12.1, 2.1       | 0.53 qd-like   | 11.3, 3.0     | 0.69 qd-like   | 11.9, 2.4     | 0.58 qd-like   | 12.5, 1.6       |
| 7   | 1.48 m         |               | 1.51 m         |               | 1.47 m         |               | 1.46 m         |               | 1.43 m         |                 | 1.42 m         |               | 1.39 m         |               | 1.88 m         |                 |
|     | 1.44 m         |               | 1.47 m         |               | 1.43 m         |               | 1.41 m         |               | 1.37 m         |                 | 1.38 m         |               | 0.75 m         |               | 1.03 m         |                 |
| 8   | 1.65 m         |               | 1.70 m         |               | 1.64 m         |               | 1.60 m         |               | 1.60 m         |                 | 1.60 m         |               | 1.84 m         |               | 1.49 m         |                 |
| 11  | 1.99 m         |               | 2.06 m         |               | 1.99 m         |               | 1.95 m         |               | 1.94 m         |                 | 1.94 m         |               | 1.90 m         |               | 1.16 m         |                 |
|     | 1.09 m         |               | 1.18 m         |               | 1.10 m         |               | 1.05 m         |               | 1.04 ddd       | 12.7, 10.8, 2.7 | 1.05 m         |               | 1.53 m         |               | 0.92 m         |                 |
| 12  | 1.74 m         |               | 1.78 m         |               | 1.74 m         |               | 1.71 m         |               | 1.66 m         |                 | 1.68 m         |               | 1.63 m         |               | 1.49 m         |                 |
|     | 1.56 m         |               | 1.61 m         |               | 1.56 m         |               | 1.53 m         |               | 1.49 m         |                 | 1.51 m         |               | 1.58 m         |               | 1.44 m         |                 |
| 15  | 2.97 dd        | 12.7, 7.9     | 2.99 dd        | 12.8, 7.8     | 2.95 dd        | 12.7, 7.8     | 2.93 dd        | 12.7, 7.8     | 2.93 dd        | 12.7, 7.8       | 2.93 dd        | 12.7, 7.5     | 2.59 dd        | 13.0, 8.0     | 1.87 m         |                 |
|     | 1.65 dd        | 12.7, 6.4     | 1.69 dd        | 12.8, 6.5     | 1.63 dd        | 12.7, 6.4     | 1.60 dd        | 12.7, 6.9     | 1.59 m         |                 | 1.60 m         |               | 1.47 m         |               | 1.60 m         |                 |
| 16  | 4.50 ddd       | 8.3, 7.9, 6.4 | 4.50 ddd       | 8.4, 7.8, 6.5 | 4.49 ddd       | 8.4, 7.8, 6.4 | 4.50 ddd       | 8.4, 7.8, 6.9 | 4.49 m         |                 | 4.50 q-like    | 7.5           | 4.42 q-like    | 8.0           | 4.06 m         |                 |
| 17  | 1.87 dd        | 10.3, 8.3     | 1.89 dd        | 9.9, 8.4      | 1.87 dd        | 10.2, 8.4     | 1.85 dd        | 10.3, 8.4     | 1.84 dd        | 9.6, 8.3        | 1.85 dd        | 9.3, 7.5      | 1.25 m         |               | 1.55 dd        | 10.0, 8.3       |
| 18  | 1.36 s         |               | 1.40 s         |               | 1.35 s         |               | 1.32 s         |               | 1.32 s         |                 | 1.32 s         |               | 1.29 s         |               | 1.21 s         |                 |
| 19  | 0.48 d         | 4.0           | 0.56 d         | 4.1           | 0.47 d         | 4.0           | 0.44 d         | 3.9           | 0.44 d         | 3.9             | 0.43 d         | 3.7           | 0.62 d         | 4.4           | 0.43 d         | 4.0             |
|     | 0.20 d         | 4.0           | 0.32 d         | 4.1           | 0.20 d         | 4.0           | 0.16 d         | 3.9           | 0.20 d         | 3.9             | 0.18 d         | 3.7           | 0.19 d         | 4.4           | 0.16 d         | 4.0             |
| 20  | 2.27 m         |               | 2.29 m         |               | 2.26 m         |               | 2.23 m         |               | 2.23 m         |                 | 2.23 m         |               | 2.20 m         |               | 2.20 m         |                 |
| 21  | 0.97 d         | 6.5           | 0.99 d         | 6.5           | 0.97 d         | 6.6           | 0.95 d         | 6.5           | 0.96 d         | 6.5             | 0.95 d         | 6.5           | 0.91 d         | 6.6           | 0.97 d         | 6.6             |
|     | 1.56 dd        | 13.3, 2.6     | 1.57 dd        | 13.3, 2.6     | 1.55 dd        | 13.1, 2.2     | 1.54 dd        | 13.3, 2.4     | 1.54 dd        | 13.4, 2.5       | 1.54 dd        | 13.1, 1.6     | 1.57 dd        | 13.1, 1.6     | 1.57 dd        | 13.2, 3.1       |
| 22  | 1.34 dd        | 13.3, 13.3    | 1.35 dd        | 13.3, 13.3    | 1.35 dd        | 13.1, 13.1    | 1.26 dd        | 13.3, 13.3    | 1.34 dd        | 13.4, 13.4      | 1.37 dd        | 13.1, 13.1    | 1.29 m         |               | 1.38 dd        | 13.2, 13.2      |
| 24  | 3.51 s         |               | 3.50 s         |               | 3.51 s         |               | 3.54 s         |               | 3.51 s         |                 | 3.52 s         |               | 3.58 s         |               | 3.66 s         |                 |
| 26  | 4.02 d         | 10.3          | 4.03 d         | 10.1          | 4.02 d         | 10.2          | 4.01 d         | 10.3          | 4.00 d         | 10.3            | 4.01 d         | 10.2          | 4.03 d         | 10.3          | 4.02 d         | 10.3            |
|     | 3.59 d         | 10.3          | 3.60 d         | 10.1          | 3.59 d         | 10.2          | 3.58 d         | 10.3          | 3.58 d         | 10.3            | 3.58 d         | 10.2          | 3.58 d         | 10.3          | 3.60 d         | 10.3            |
| 27  | 1.42 s         |               | 1.43 s         |               | 1.43 s         |               | 1.41 s         |               | 1.41 s         |                 | 1.41 s         |               | 1.44 s         |               | 1.45 s         |                 |
| 28  | 4.02 d         | 11.3          | 4.05 d         | 11.4          | 4.02 d         | 11.5          | 4.00 d         | 11.3          | 3.96 d         | 11.4            | 3.98 d         | 11.4          | 10.14 s        |               | 0.80 s         |                 |
|     | 3.94 d         | 11.3          | 3.96 d         | 11.4          | 3.94 d         | 11.5          | 3.93 d         | 11.3          | 3.89 d         | 11.4            | 3.90 d         | 11.4          |                |               |                |                 |
| 29  | 1.29 s         |               | 1.17 s         |               | 1.27 s         |               | 1.24 s         |               | 1.21 s         |                 | 1.22 s         |               | 1.27 s         |               | 1.28 s         |                 |
| 30  | 1.03 s         |               | 1.07 s         |               | 1.02 s         |               | 0.99 s         |               | 1.00 s         |                 | 0.99 s         |               | 1.00 s         |               | 1.02 s         |                 |
| 1'  | 4.94 d         | 7.8           |                |               | 4.87 d         | 7.8           | 4.86 d         | 7.8           | 4.86 d         | 7.7             | 4.80 d         | 7.5           | 4.90 d         | 7.8           | 4.90 d         | 7.7             |
| 2'  | 4.05 dd        | 8.2, 7.8      |                |               | 4.03 dd        | 8.7, 7.8      | 4.03 dd        | 8.3, 7.8      | 3.97 dd        | 8.1, 7.7        | 3.87 dd        | 8.4, 7.5      | 4.05 dd        | 8.6, 7.8      | 3.99 dd        | 8.7, 7.7        |
| 3'  | 4.27 dd        | 8.7, 8.2      |                |               | 4.26 dd        | 8.7, 8.7      | 4.20 dd        | 9.0, 8.3      | 4.19 dd        | 8.9, 8.1        | 4.17 dd        | 9.1, 8.4      | 4.29 dd        | 8.6, 8.4      | 4.18 dd        | 9.1, 8.7        |
| 4'  | 4.25 dd        | 9.1, 8.7      |                |               | 4.30 dd        | 9.8, 8.7      | 4.07 dd        | 9.4, 9.0      | 4.07 dd        | 8.9, 8.9        | 4.37 dd        | 9.1, 9.1      | 4.33 dd        | 8.9, 8.4      | 4.09 dd        | 9.1, 7.9        |
| 5'  | 3.98 ddd       | 9.1, 5.3, 2.4 |                |               | 3.92 ddd       | 9.8, 3.9, 2.1 | 3.88 ddd       | 9.4, 5.0, 2.0 | 4.09 m         |                 | 3.96 m         |               | 3.97 m         |               | 4.10 m         |                 |
| 6'a | 4.58 dd        | 11.7, 2.4     |                |               | 4.56 dd        | 12.0, 3.9     | 4.44 dd        | 11.9, 2.0     | 4.82 br d      | 11.0            | 4.82 br d      | 11.2          | 4.59 dd        | 11.9, 4.0     | 4.85 br d      | 10.7            |
| b   | 4.42 dd        | 11.7, 5.3     |                |               | 4.48 dd        | 12.0, 2.1     | 4.27 dd        | 11.9, 5.0     | 4.31 dd        | 11.0, 5.3       | 4.63 dd        | 11.2, 3.8     | 4.30 br d      | 11.9          | 4.34 dd        | 12.1, 5.5       |
| 1"  |                |               |                |               | 5.20 d         | 7.9           | 5.28 d         | 7.9           | 5.28 d         | 7.8             | 5.45 d         | 7.9           | 5.21 d         | 7.9           | 5.16 d         | 7.8             |
| 2"  |                |               |                |               | 4.09 dd        | 8.3, 7.9      | 4.04 dd        | 8.3, 7.9      | 4.03 dd        | 8.8, 7.8        | 4.03 dd        | 8.9, 7.9      | 4.12 dd        | 8.6, 7.9      | 4.19 dd        | 8.7, 7.8        |
| 3"  |                |               |                |               | 4.24 dd        | 8.8, 8.3      | 4.25 dd        | 9.0, 8.3      | 4.24 dd        | 8.8, 8.8        | 4.35 dd        | 9.1, 8.9      | 4.24 dd        | 8.6, 8.6      | 4.22 dd        | 9.1, 8.7        |
| 4"  |                |               |                |               | 4.20 dd        | 9.1, 8.8      | 4.16 dd        | 9.5, 9.0      | 4.21 dd        | 8.8, 8.4        | 4.19 dd        | 9.5, 9.1      | 4.20 dd        | 8.6, 8.6      | 4.23 dd        | 9.1, 8.1        |
| 5"  |                |               |                |               | 3.99 ddd       | 9.1, 5.7, 2.1 | 3.98 ddd       | 9.5, 5.5, 2.1 | 3.90 ddd       | 8.4, 5.2, 2.0   | 4.13 m         |               | 4.01 ddd       | 8.6, 4.8, 2.3 | 3.92 ddd       | 8.1, 5.2, 2.5   |
| 6"a |                |               |                |               | 4.50 dd        | 11.7, 2.1     | 4.49 dd        | 11.7, 2.1     | 4.47 dd        | 11.8, 2.0       | 4.45 br d      | 11.7          | 4.53 dd        | 12.0, 2.3     | 4.51 dd        | 11.9, 2.5       |
| b   |                |               |                |               | 4.28 dd        | 11.7, 5.7     | 4.28 dd        | 11.7, 5.5     | 4.34 dd        | 11.8, 5.2       | 4.25 dd        | 11.7, 4.7     | 4.32 dd        | 12.0, 4.8     | 4.37 dd        | 11.9, 5.2       |
| 1"  |                |               |                |               |                |               |                |               |                |                 | 5.34 d         | 7.8           |                |               |                |                 |
| 2"  |                |               |                |               |                |               |                |               |                |                 | 4.01 dd        | 8.4, 7.8      |                |               |                |                 |
| 3"  |                |               |                |               |                |               |                |               |                |                 | 4.25 dd        | 9.3, 8.4      |                |               |                |                 |
| 4"  |                |               |                |               |                |               |                |               |                |                 | 4.22 dd        | 9.3, 8.8      |                |               |                |                 |
| 5"  |                |               |                |               |                |               |                |               |                |                 | 3.93 m         |               |                |               |                |                 |
| 6"a |                |               |                |               |                |               |                |               |                |                 | 4.43 br d      | 12.0          |                |               |                |                 |
| b   |                |               |                |               |                |               |                |               |                |                 | 4.31 dd        | 12.0, 4.1     |                |               |                |                 |

**Table 2.** <sup>1</sup>H-NMR spectral data for compounds **8–11**, and **8a** in C<sub>5</sub>D<sub>5</sub>N

|       | 8              |                 | 8a             |                 | 9              |               | 10             |               | 11             |                 |
|-------|----------------|-----------------|----------------|-----------------|----------------|---------------|----------------|---------------|----------------|-----------------|
|       | <sup>1</sup> H | <i>J</i> (Hz)   | <sup>1</sup> H | <i>J</i> (Hz)   | <sup>1</sup> H | <i>J</i> (Hz) | <sup>1</sup> H | <i>J</i> (Hz) | <sup>1</sup> H | <i>J</i> (Hz)   |
| 1     | 1.44 ddd       | 13.5, 12.2, 3.0 | 1.53 ddd       | 13.1, 11.5, 2.9 | 1.43 m         |               | 1.65 m         |               | 1.62 ddd       | 13.2, 11.6, 3.1 |
| 2     | 1.11 m         |                 | 1.21 m         |                 | 1.09 m         |               | 1.23 m         |               | 1.21 m         |                 |
|       | 2.29 m         |                 | 1.98 m         |                 | 2.33 m         |               | 2.53 m         |               | 2.51 m         |                 |
| 3     | 1.84 m         |                 | 1.88 qd-like   | 11.5, 3.6       | 1.82 m         |               | 1.93 m         |               | 1.92 m         |                 |
|       | 3.42 dd        | 11.7, 4.3       | 3.49 dd        | 11.5, 4.4       | 3.45 dd        | 11.7, 4.3     | 3.48 dd        | 11.5, 4.0     | 3.51 ddd       | 11.6, 4.3       |
| 5     | 1.28 dd        | 11.9, 2.9       | 1.30 dd        | 12.5, 3.6       | 1.27 dd        | 11.7, 3.3     | 1.25 m         |               | 1.21 m         |                 |
| 6     | 1.51 m         |                 | 1.54 m         |                 | 1.53 m         |               | 1.46 m         |               | 1.41 m         |                 |
| 7     | 0.65 qd-like   | 11.9, 2.7       | 0.70 qd-like   | 11.9, 2.6       | 0.65 qd-like   | 11.8, 2.8     | 0.62 qd-like   | 12.5, 2.5     | 0.61 qd-like   | 12.4, 2.1       |
|       | 1.56 m         |                 | 1.57 m         |                 | 1.56 m         |               | 1.52 m         |               | 1.19 m         |                 |
| 8     | 1.51 m         |                 | 1.54 m         |                 | 1.54 m         |               | 1.48 m         |               | 0.94 m         |                 |
|       | 1.70 m         |                 | 1.71 dd        | 12.5, 4.6       | 1.70 m         |               | 1.66 m         |               | 1.51 m         |                 |
| 11    | 2.00 m         |                 | 2.03 m         |                 | 1.99 m         |               | 1.95 m         |               | 1.88 m         |                 |
| 12    | 1.12 ddd       | 12.6, 10.7, 4.2 | 1.15 m         |                 | 1.10 m         |               | 1.07 m         |               | 1.02 m         |                 |
|       | 1.71 m         |                 | 1.72 m         |                 | 1.72 m         |               | 1.65 m         |               | 1.44 m         |                 |
| 15    | 1.57 m         |                 | 1.58 m         |                 | 1.57 m         |               | 1.51 m         |               | 1.42 m         |                 |
|       | 2.99 dd        | 12.6, 7.9       | 3.01 dd        | 12.6, 8.0       | 3.00 dd        | 12.5, 8.0     | 2.99 dd        | 12.4, 8.0     | 1.88 m         |                 |
| 16    | 1.57 m         |                 | 1.58 dd        | 12.6, 6.4       | 1.57 m         |               | 1.54 m         |               | 1.52 m         |                 |
|       | 4.79 q-like    | 7.9             | 4.80 q-like    | 7.6             | 4.79 q-like    | 8.0           | 4.78 q-like    | 8.0           | 4.48 q-like    | 7.6             |
| 17    | 1.83 m         |                 | 1.84 m         |                 | 1.85 m         |               | 1.82 m         |               | 1.53 m         |                 |
| 18    | 1.32 s         |                 | 1.34 s         |                 | 1.32 s         |               | 1.30 s         |               | 1.15 s         |                 |
| 19    | 0.55 d         | 4.0             | 0.60 d         | 3.8             | 0.55 d         | 3.9           | 0.53 d         | 3.6           | 0.46 d         | 4.0             |
| 20    | 0.26 d         | 4.0             | 0.34 d         | 3.8             | 0.25 d         | 3.9           | 0.26 d         | 3.6           | 0.13 d         | 4.0             |
|       | 1.84 m         |                 | 1.85 m         |                 | 1.84 m         |               | 1.82 m         |               | 1.76 m         |                 |
| 21    | 0.90 d         | 5.8             | 0.90 d         | 5.8             | 0.90 d         | 5.6           | 0.90 d         | 5.3           | 0.88 d         | 6.4             |
| 22    | 2.17 dd        | 12.4, 1.9       | 2.16 dd        | 13.3, 2.0       | 2.17 br d      | 12.7          | 2.16 br d      | 13.6          | 2.14 dd        | 13.9, 2.5       |
| 24    | 1.57 dd        | 12.4, 12.4      | 1.56 dd        | 13.3, 13.3      | 1.57 dd        | 12.7, 12.7    | 1.56 dd        | 13.6, 13.6    | 1.56 dd        | 13.9, 13.9      |
|       | 3.68 s         |                 | 3.69 s         |                 | 3.68 s         |               | 3.67 s         |               | 3.64 s         |                 |
| 26    | 3.89 d         | 10.0            | 3.88 d         | 10.0            | 3.89 d         | 10.0          | 3.88 d         | 9.9           | 3.91 d         | 10.0            |
| 27    | 3.83 d         | 10.0            | 3.82 d         | 10.0            | 3.83 d         | 10.0          | 3.82 d         | 9.9           | 3.83 d         | 10.0            |
|       | 1.42 s         |                 | 1.42 s         |                 | 1.42 s         |               | 1.42 s         |               | 1.41 s         |                 |
| 28    | 4.02 d         | 11.6            | 4.03 d         | 11.4            | 4.03 d         | 11.3          | 3.98 d         | 11.5          | 0.79 s         |                 |
| 29    | 3.93 d         | 11.6            | 3.94 d         | 11.4            | 3.94 d         | 11.3          | 3.89 d         | 11.5          |                |                 |
|       | 1.29 s         |                 | 1.17 s         |                 | 1.29 s         |               | 1.25 s         |               | 1.28 s         |                 |
| 30    | 1.05 s         |                 | 1.07 s         |                 | 1.05 s         |               | 1.04 s         |               | 1.02 s         |                 |
| 1'    | 4.88 d         | 7.8             |                |                 | 4.89 d         | 7.8           | 4.89 d         | 7.7           | 4.90 d         | 7.8             |
| 2'    | 4.04 dd        | 8.2, 7.8        |                |                 | 4.07 dd        | 9.4, 7.8      | 4.00 dd        | 8.7, 7.7      | 3.99 dd        | 8.7, 7.8        |
| 3'    | 4.27 dd        | 8.9, 8.2        |                |                 | 4.22 dd        | 9.4, 8.6      | 4.21 dd        | 8.7, 8.7      | 4.22 dd        | 8.7, 8.3        |
| 4'    | 4.31 dd        | 9.1, 8.9        |                |                 | 4.11 dd        | 9.3, 8.6      | 4.12 dd        | 9.8, 8.7      | 4.11 dd        | 8.3, 8.3        |
| 5'    | 3.93 ddd       | 9.1, 3.9, 2.7   |                |                 | 3.91 ddd       | 9.3, 4.6, 1.8 | 4.11 m         |               | 4.10 m         |                 |
| 6' a  | 4.57 dd        | 12.0, 3.9       |                |                 | 4.48 dd        | 11.8, 1.8     | 4.85 br d      | 11.3          | 4.82 br d      | 11.1            |
| b     | 4.49 dd        | 12.0, 2.7       |                |                 | 4.30 dd        | 11.8, 4.6     | 4.33 dd        | 11.3, 5.2     | 4.33 dd        | 11.1, 5.1       |
| 1''   | 5.20 d         | 7.9             |                |                 | 5.31 d         | 7.9           | 5.16 d         | 7.8           | 5.15 d         | 8.0             |
| 2''   | 4.10 dd        | 8.4, 7.9        |                |                 | 4.08 dd        | 8.3, 7.9      | 4.06 dd        | 8.4, 7.8      | 4.03 dd        | 9.7, 8.0        |
| 3''   | 4.23 dd        | 8.8, 8.4        |                |                 | 4.27 dd        | 8.9, 8.3      | 4.25 dd        | 8.9, 8.4      | 4.25 dd        | 9.7, 8.8        |
| 4''   | 4.20 dd        | 9.5, 8.8        |                |                 | 4.20 dd        | 8.9, 8.9      | 4.24 dd        | 8.9, 8.4      | 4.22 dd        | 8.8, 8.8        |
| 5''   | 3.99 ddd       | 9.5, 5.4, 2.5   |                |                 | 4.03 ddd       | 8.9, 5.7, 2.2 | 3.93 ddd       | 8.4, 4.9, 2.1 | 3.90 ddd       | 8.8, 5.1, 2.4   |
| 6'' a | 4.52 dd        | 11.6, 2.5       |                |                 | 4.53 dd        | 11.7, 2.2     | 4.50 dd        | 11.4, 2.1     | 4.47 dd        | 12.1, 2.4       |
| b     | 4.30 dd        | 11.6, 5.4       |                |                 | 4.32 dd        | 11.7, 5.7     | 4.37 dd        | 11.4, 4.9     | 4.36 dd        | 12.1, 5.1       |

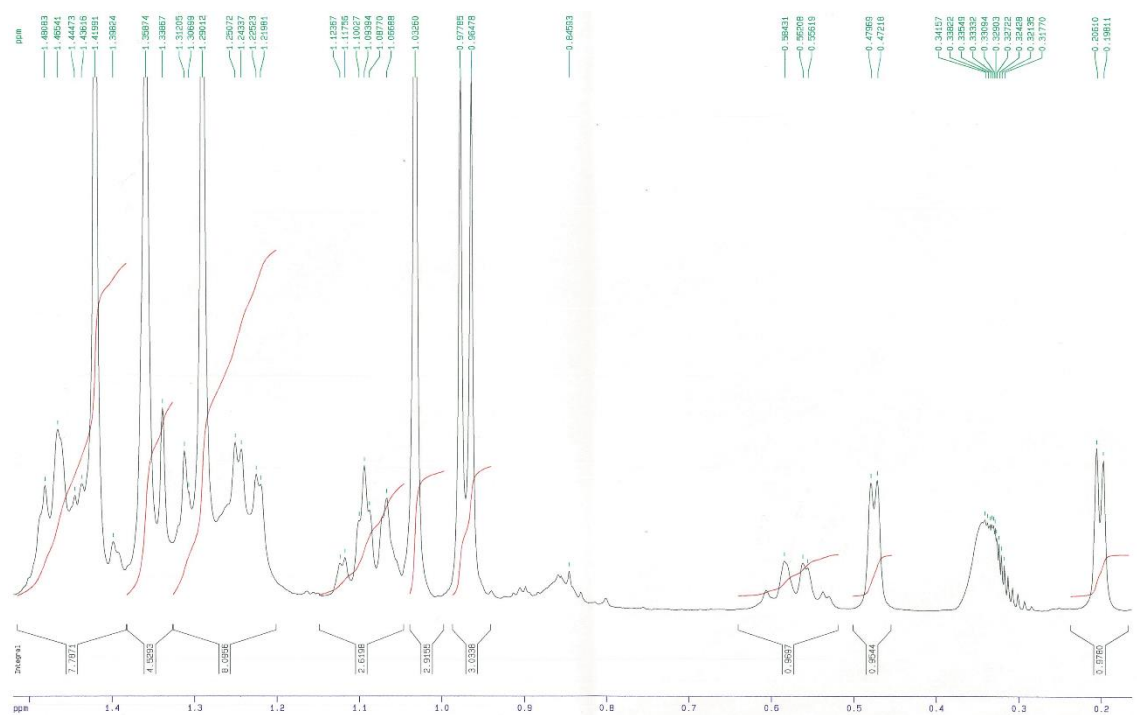

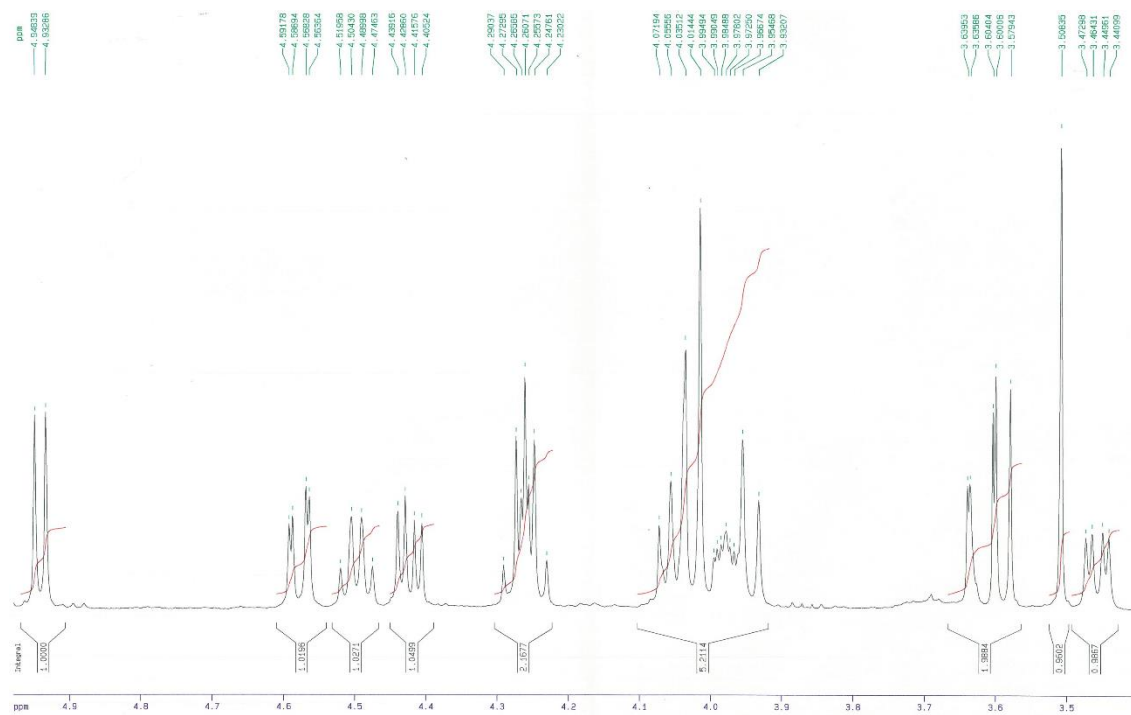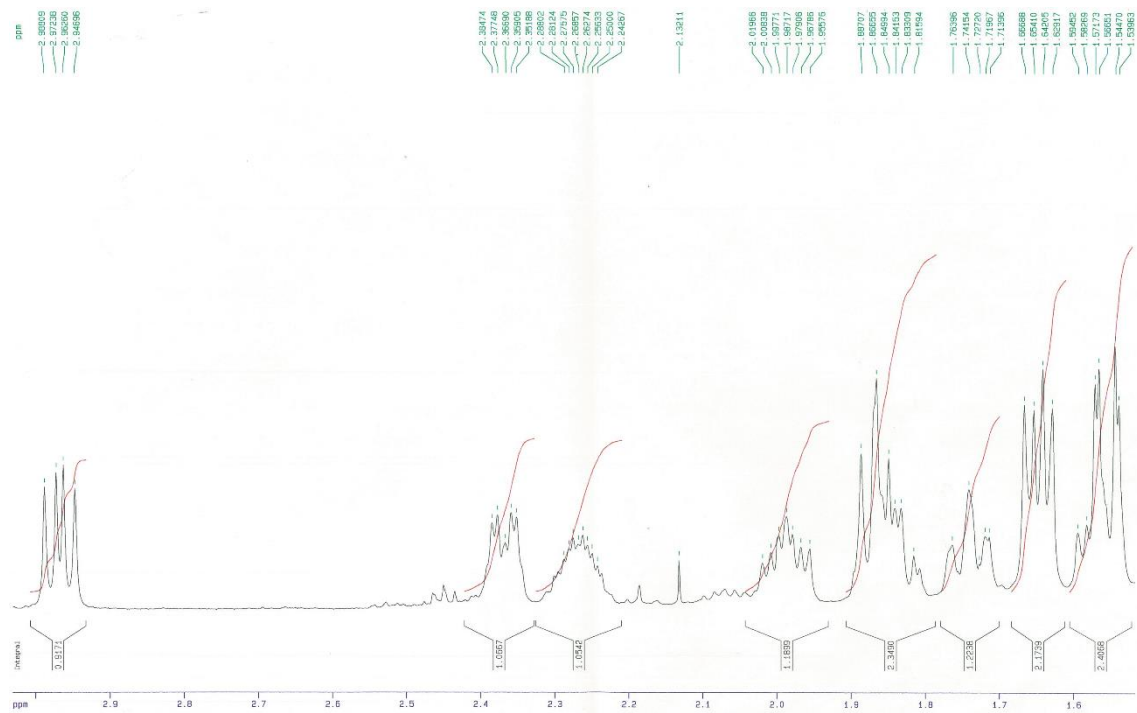



$^{13}\text{C}$ -NMR spectrum of **1** in  $\text{C}_5\text{D}_5\text{N}$

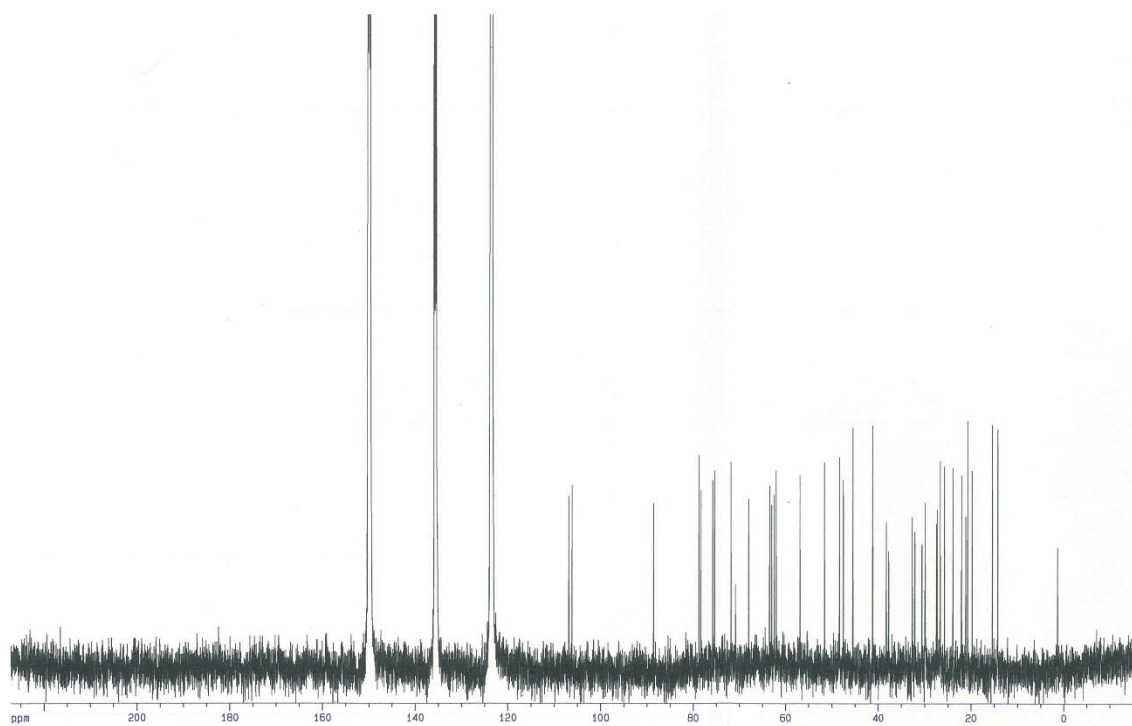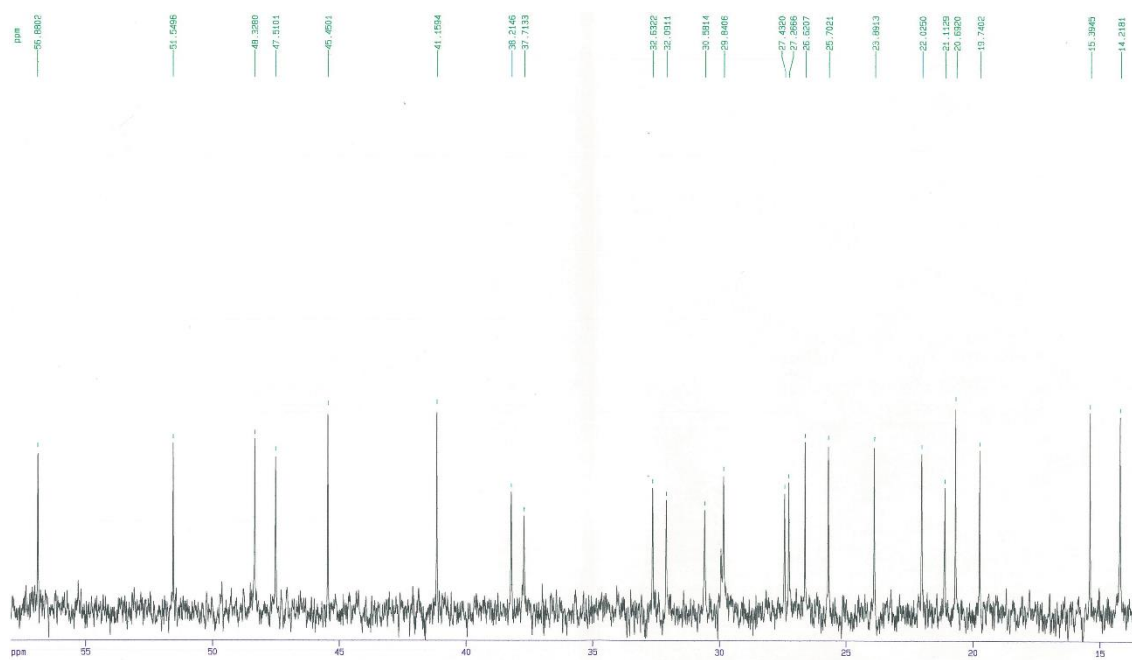

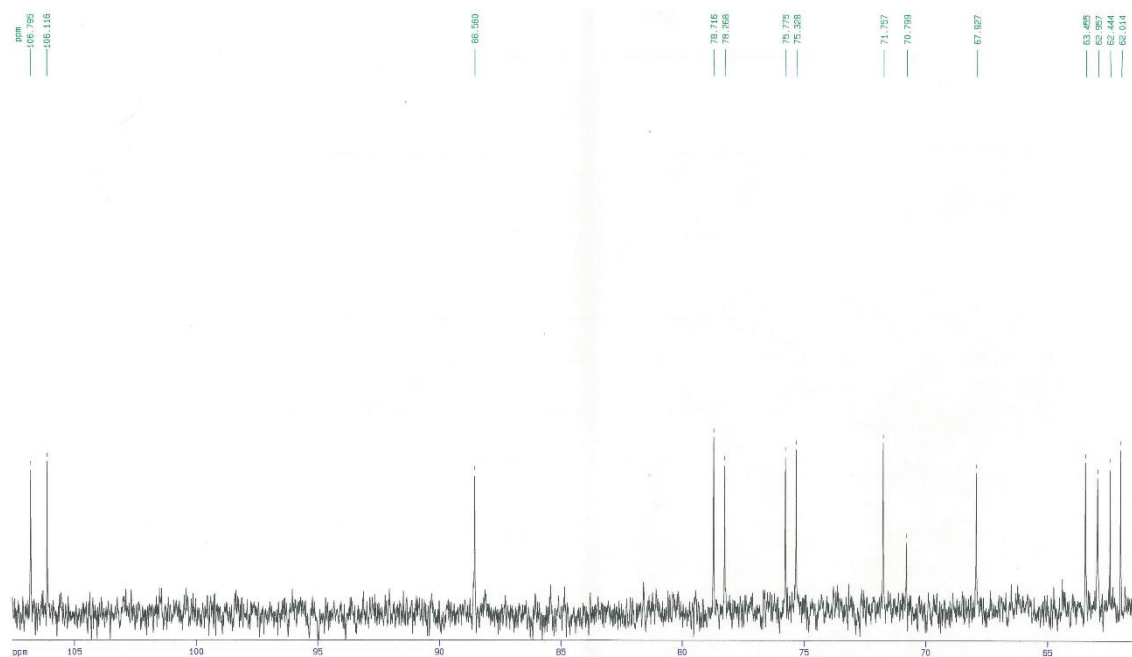

COSY spectrum of **1** in  $C_5D_5N$

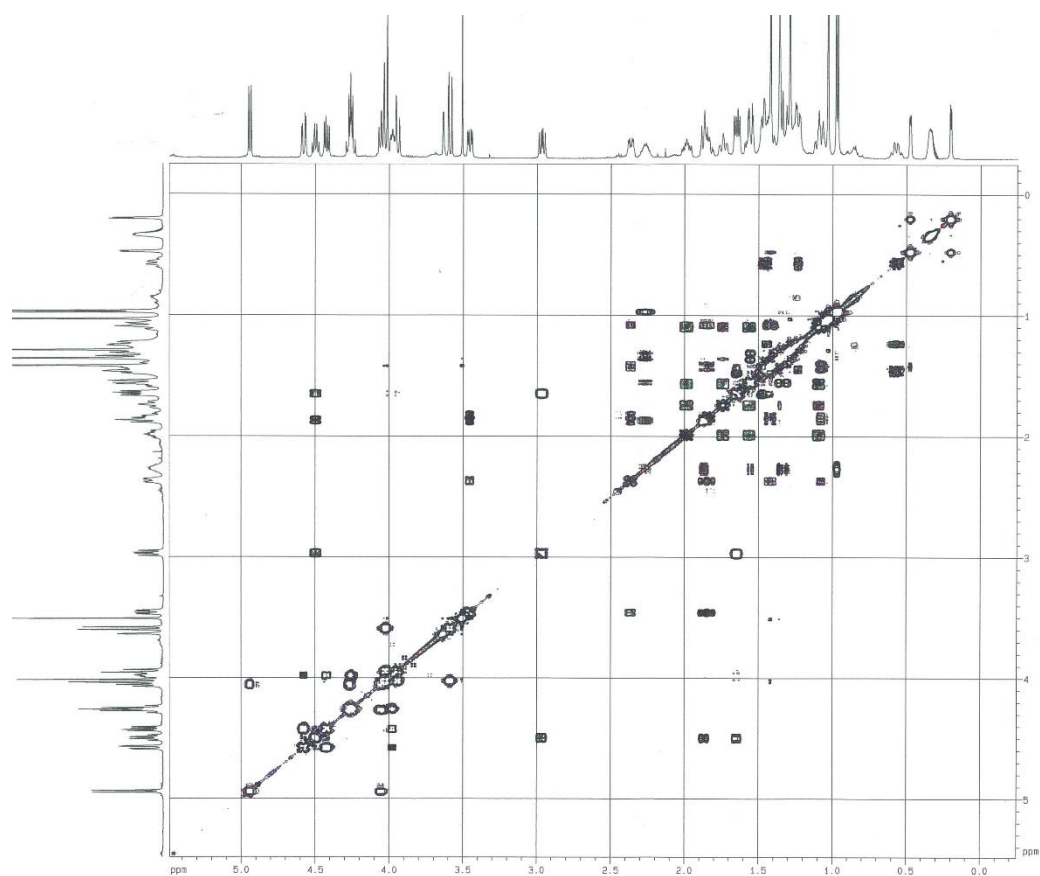

HMQC spectrum of **1** in C<sub>5</sub>D<sub>5</sub>N

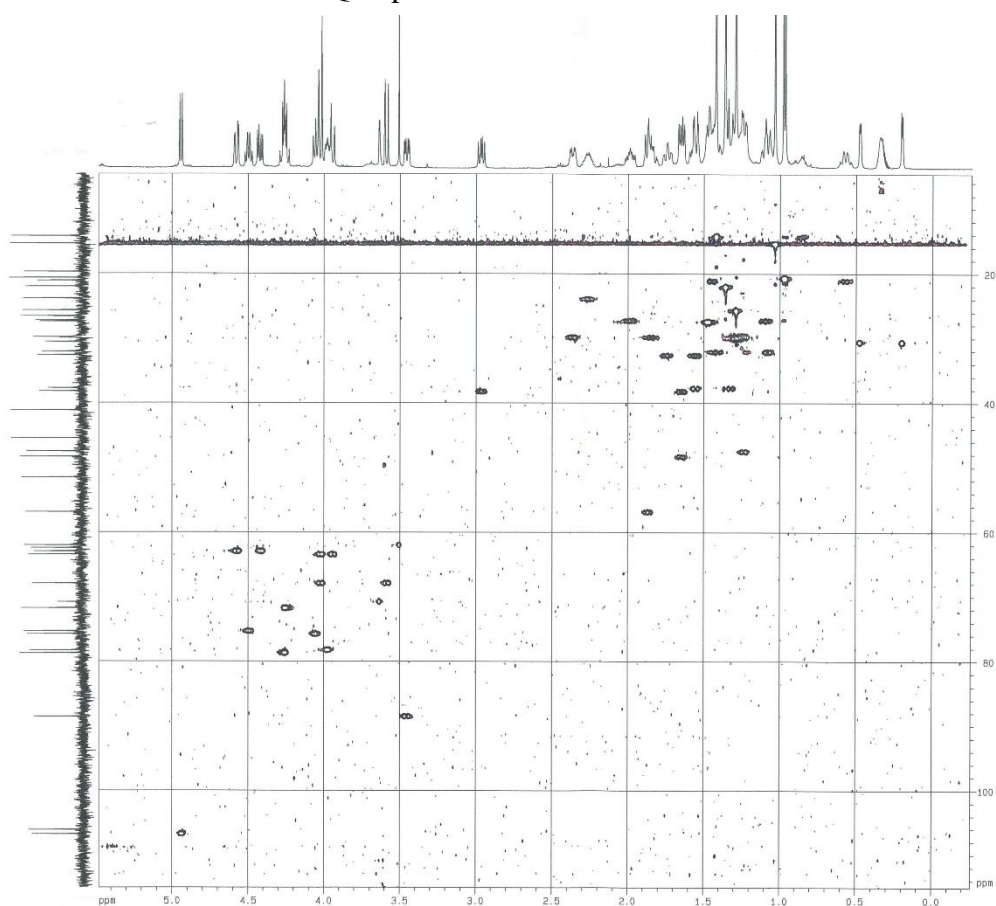

HMBC spectrum of **1** in C<sub>5</sub>D<sub>5</sub>N

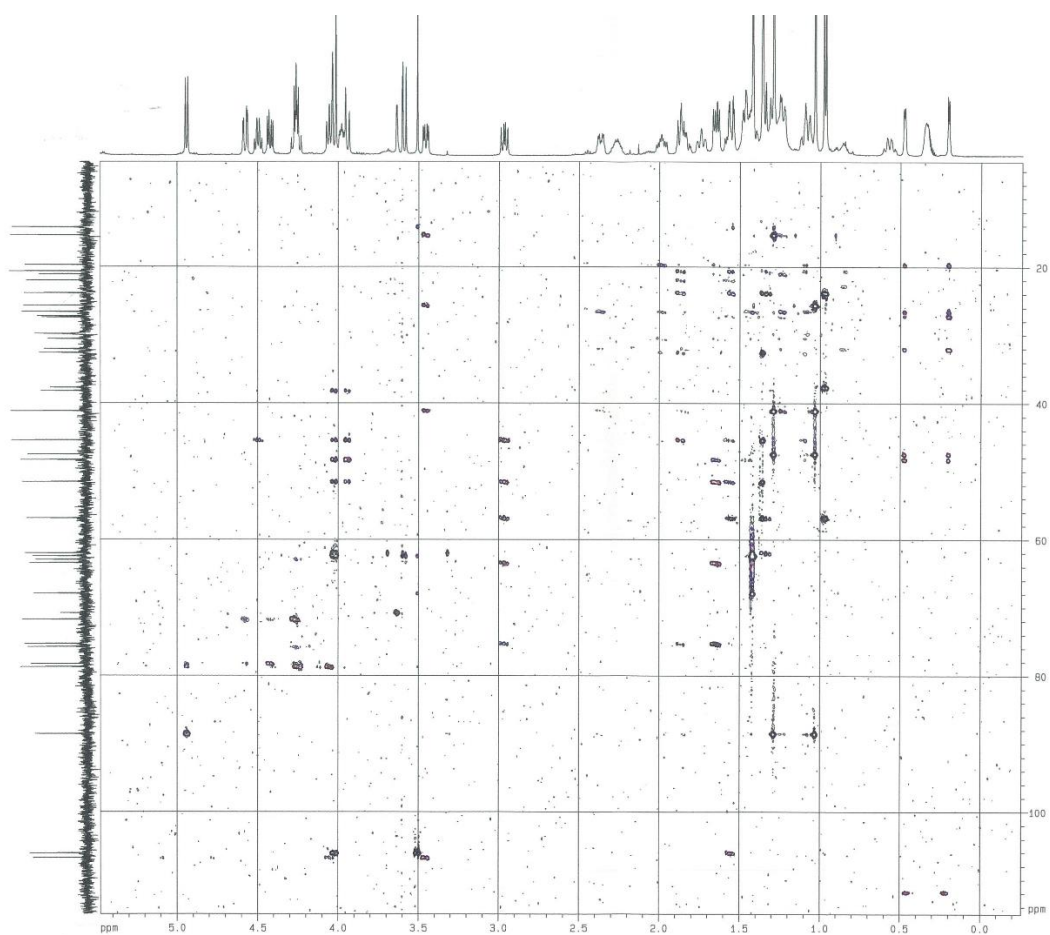

NOESY spectrum of **1** in C<sub>5</sub>D<sub>5</sub>N

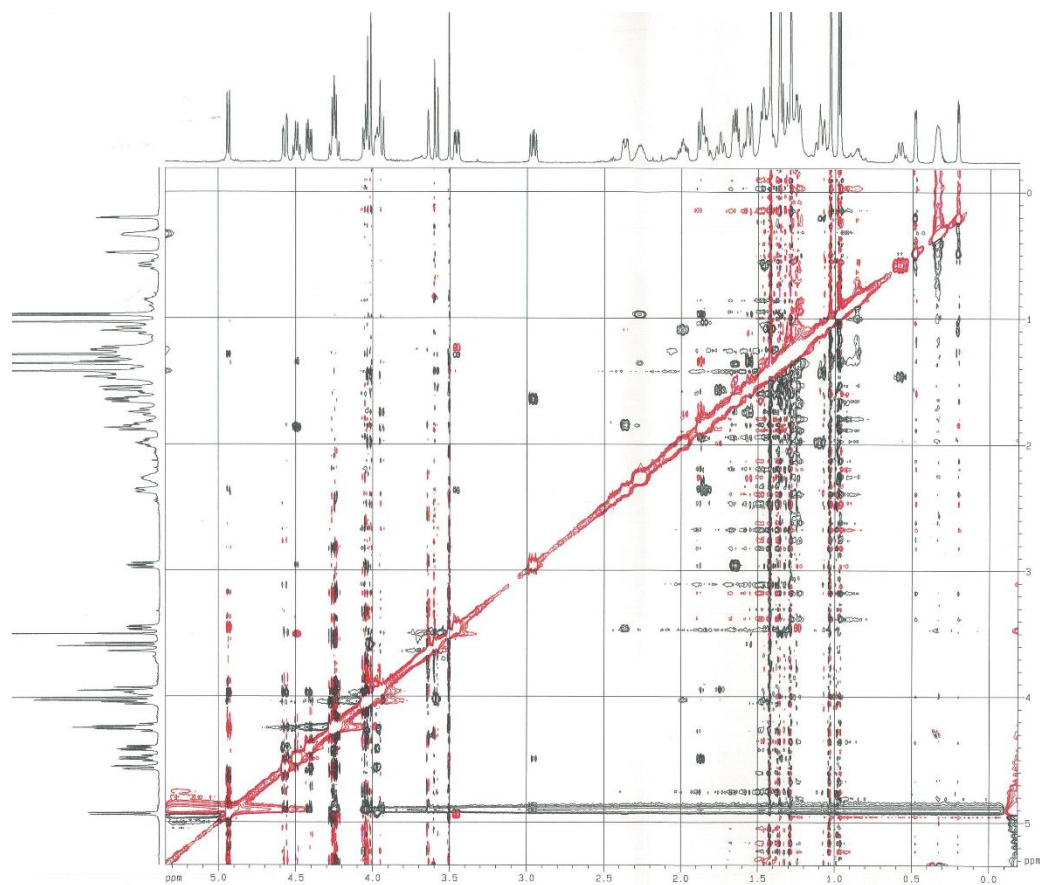

<sup>1</sup>H-NMR spectrum of **1a** in C<sub>5</sub>D<sub>5</sub>N

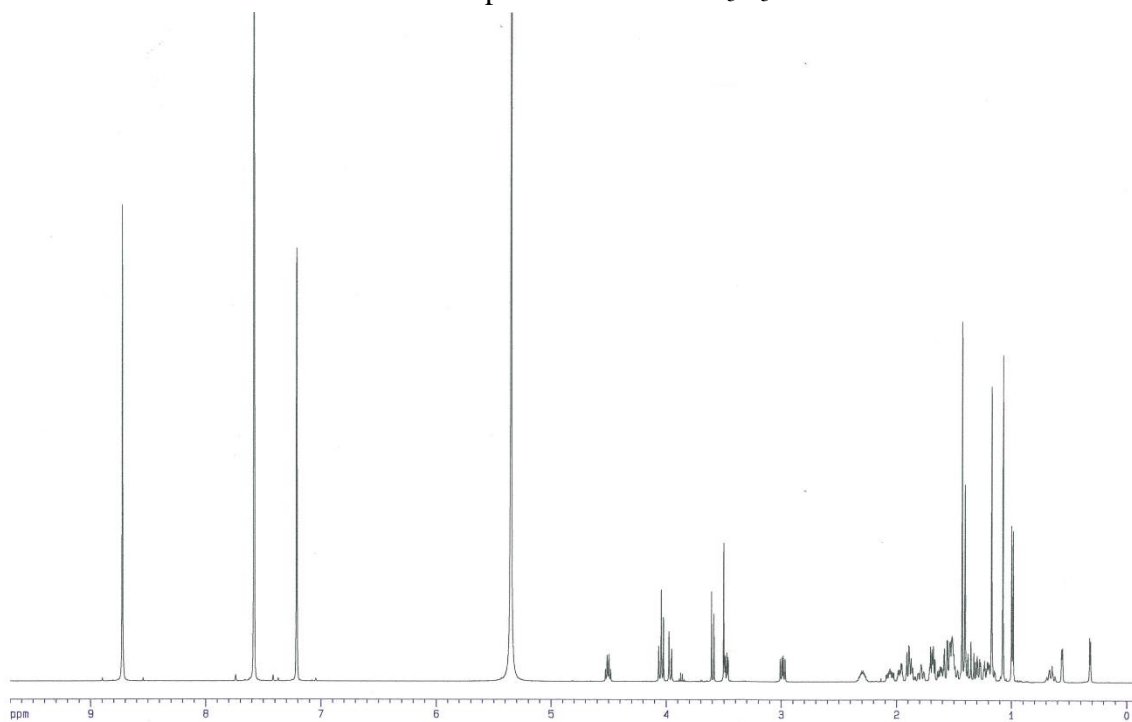

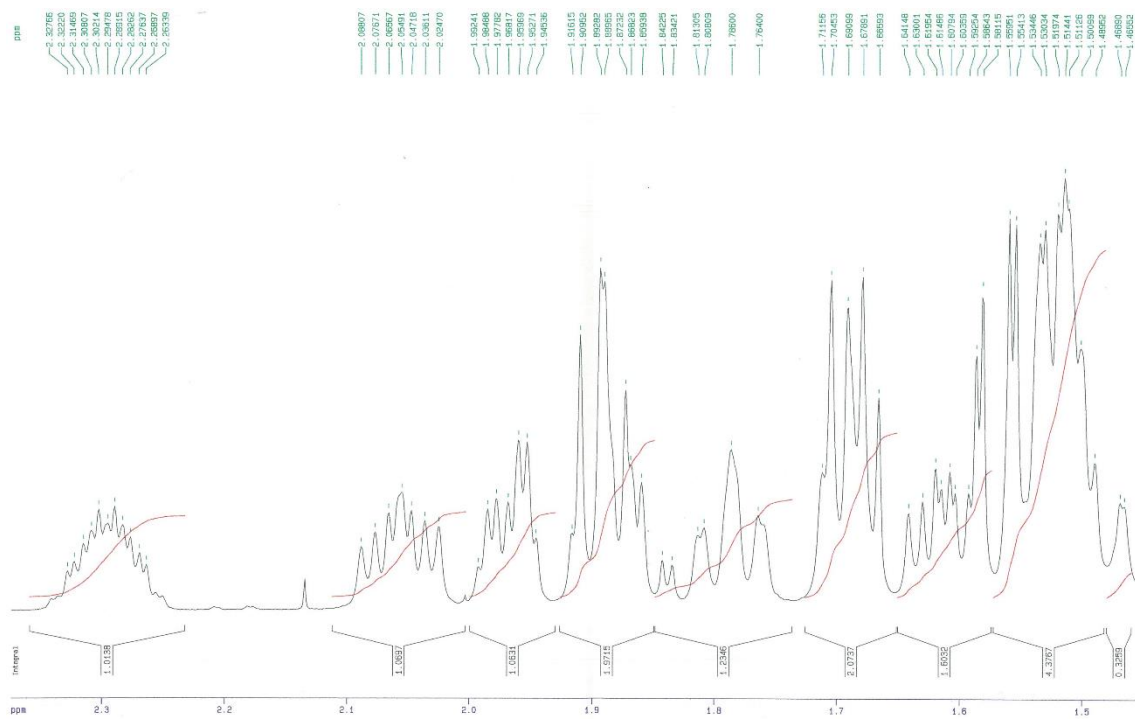

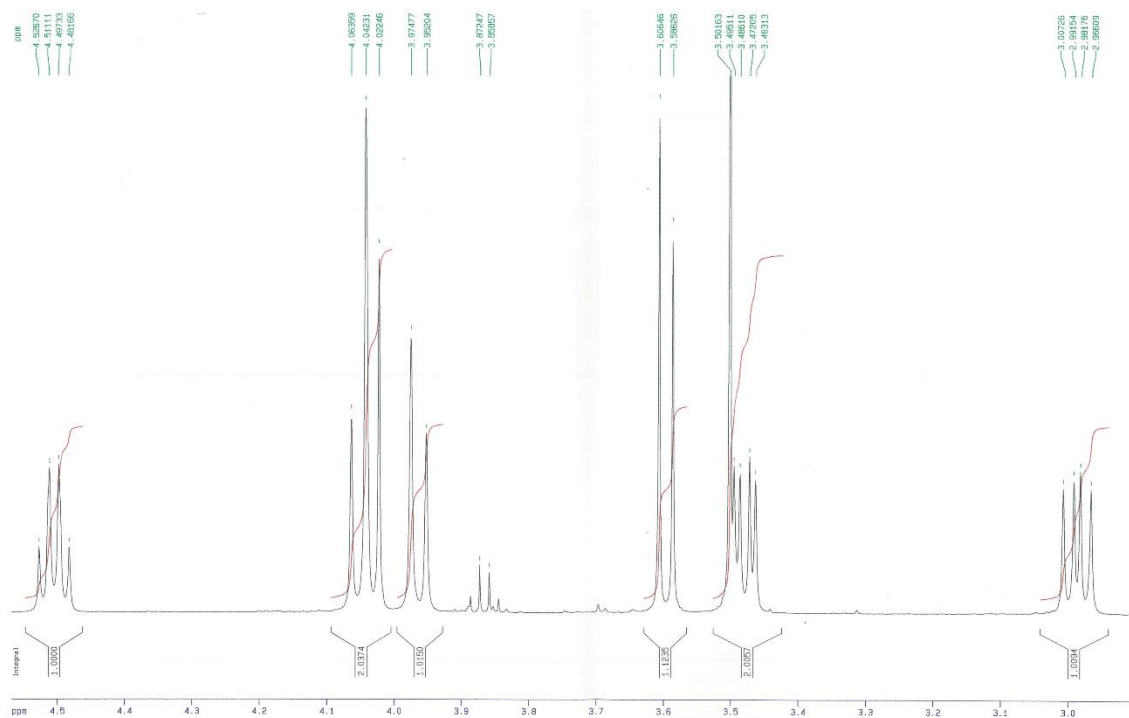

<sup>13</sup>C-NMR spectrum of **1a** in C<sub>5</sub>D<sub>5</sub>N

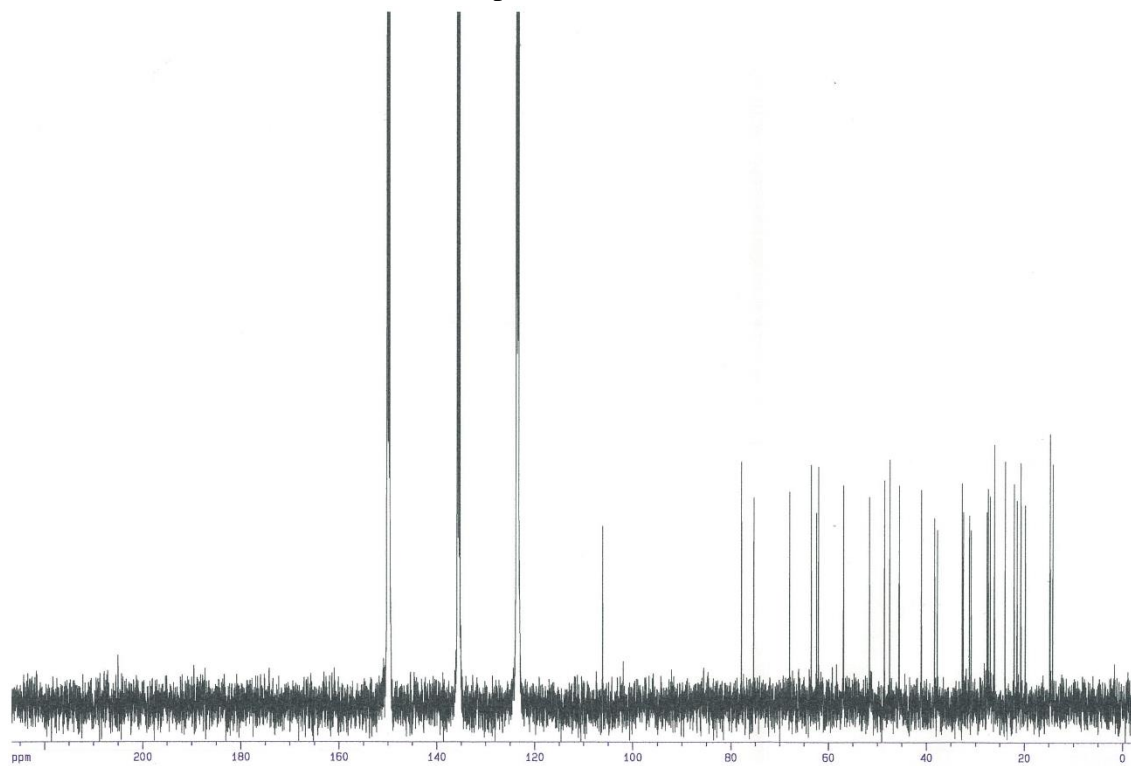



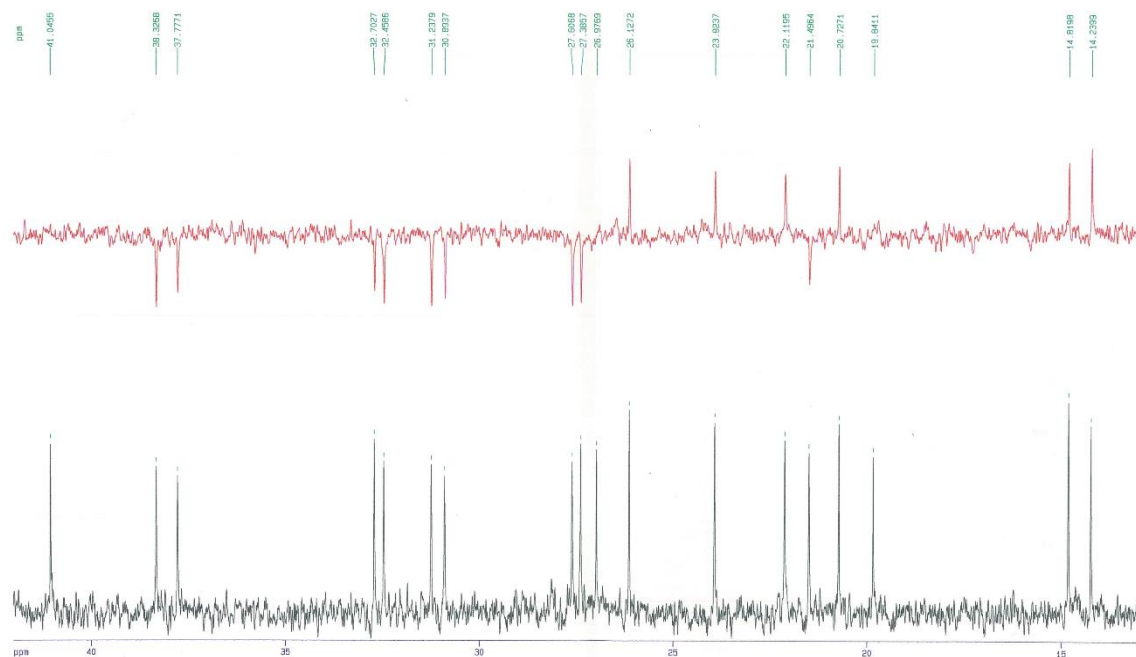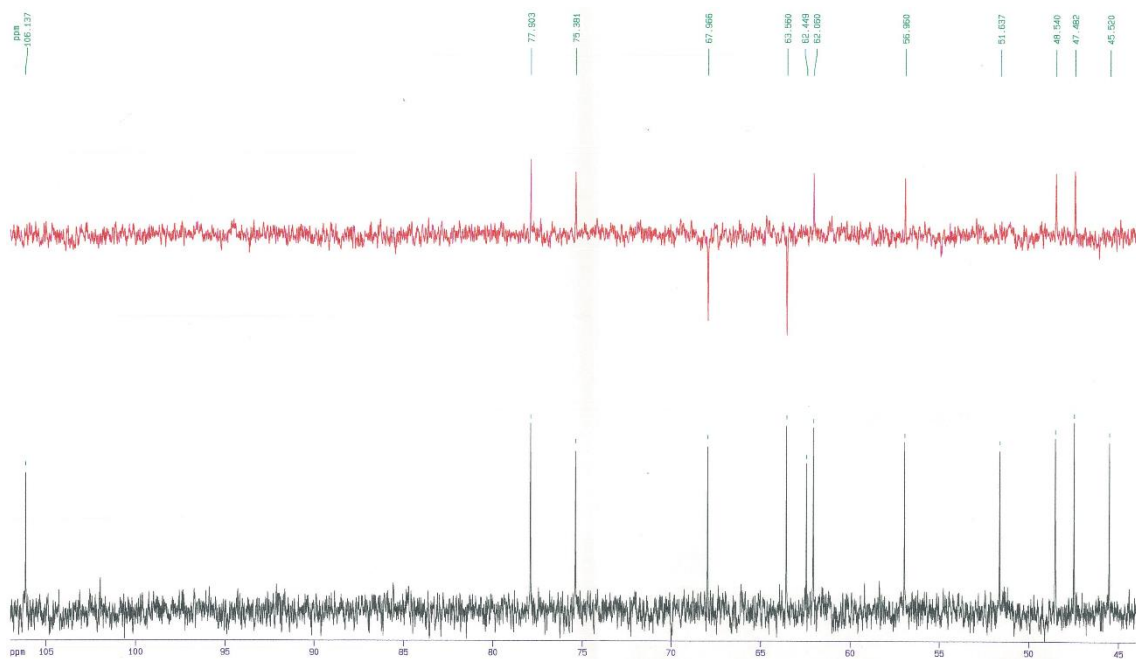



COSY spectrum of **1a** in C<sub>5</sub>D<sub>5</sub>N

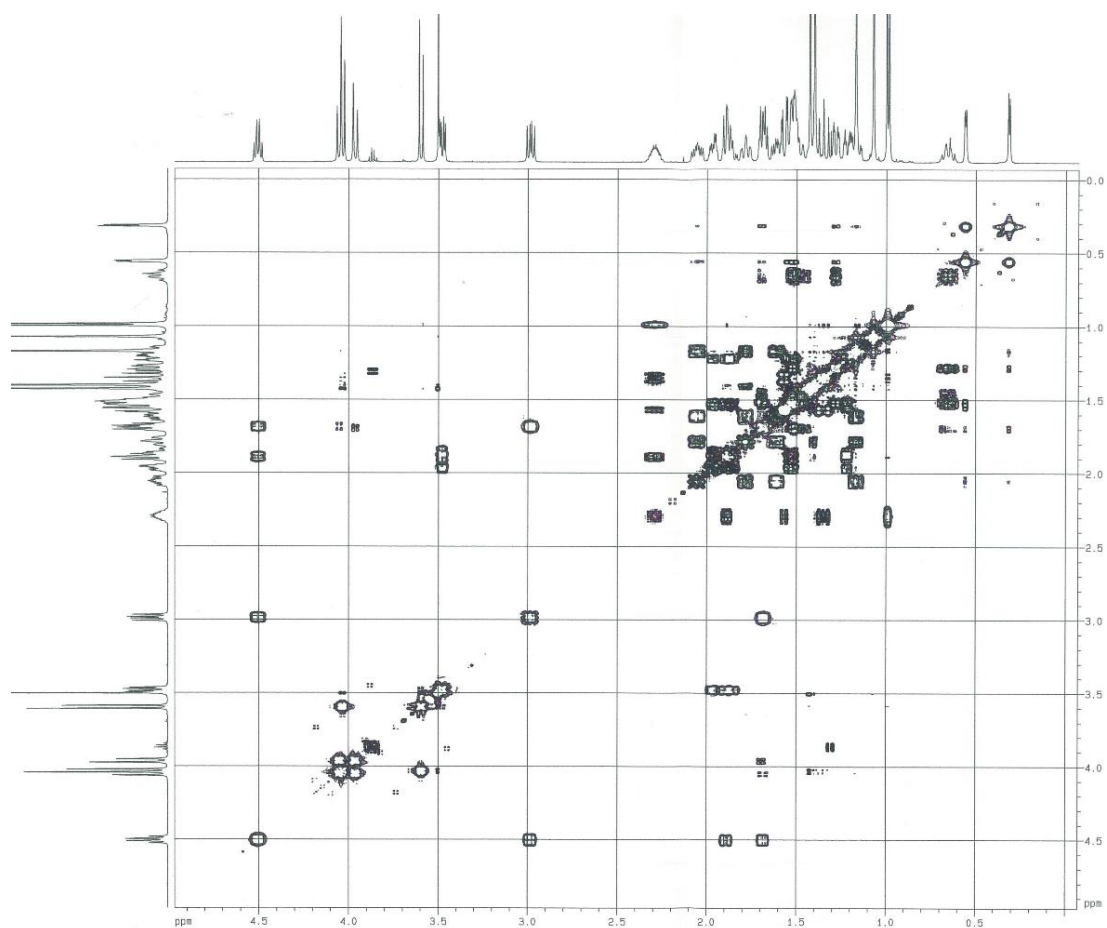

HMQC spectrum of **1a** in C<sub>5</sub>D<sub>5</sub>N

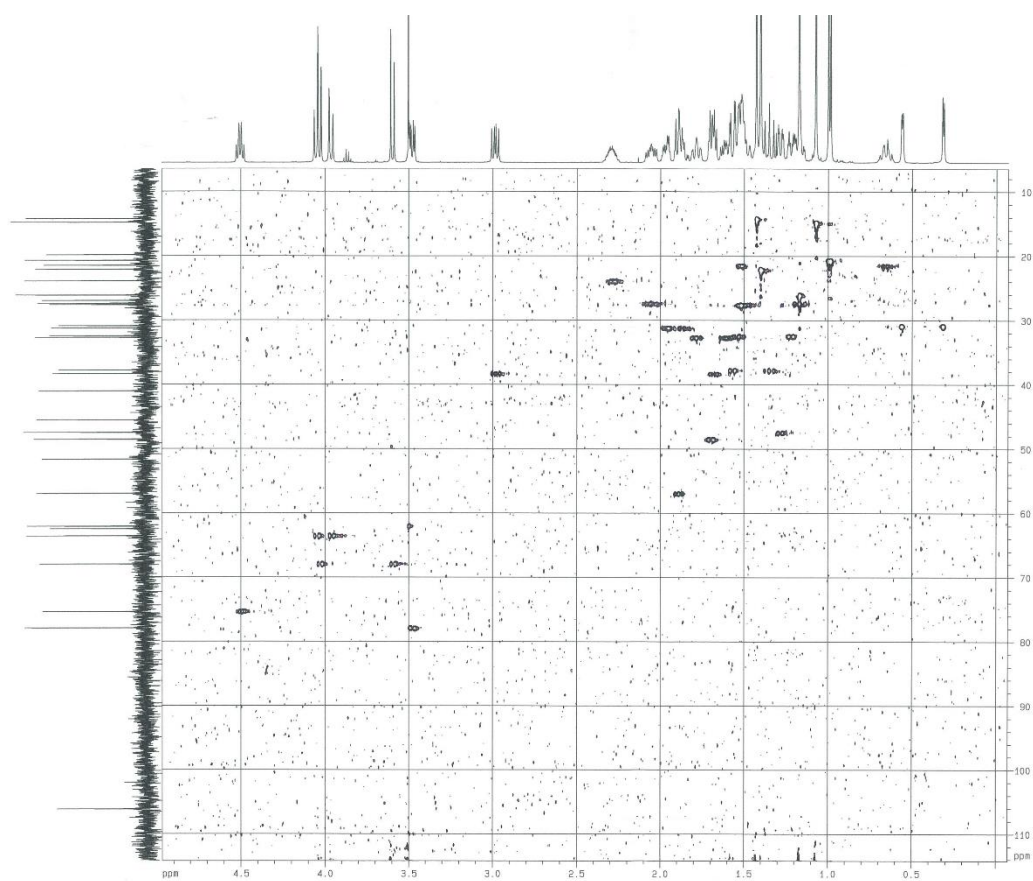

HMBC spectrum of **1a** in C<sub>5</sub>D<sub>5</sub>N

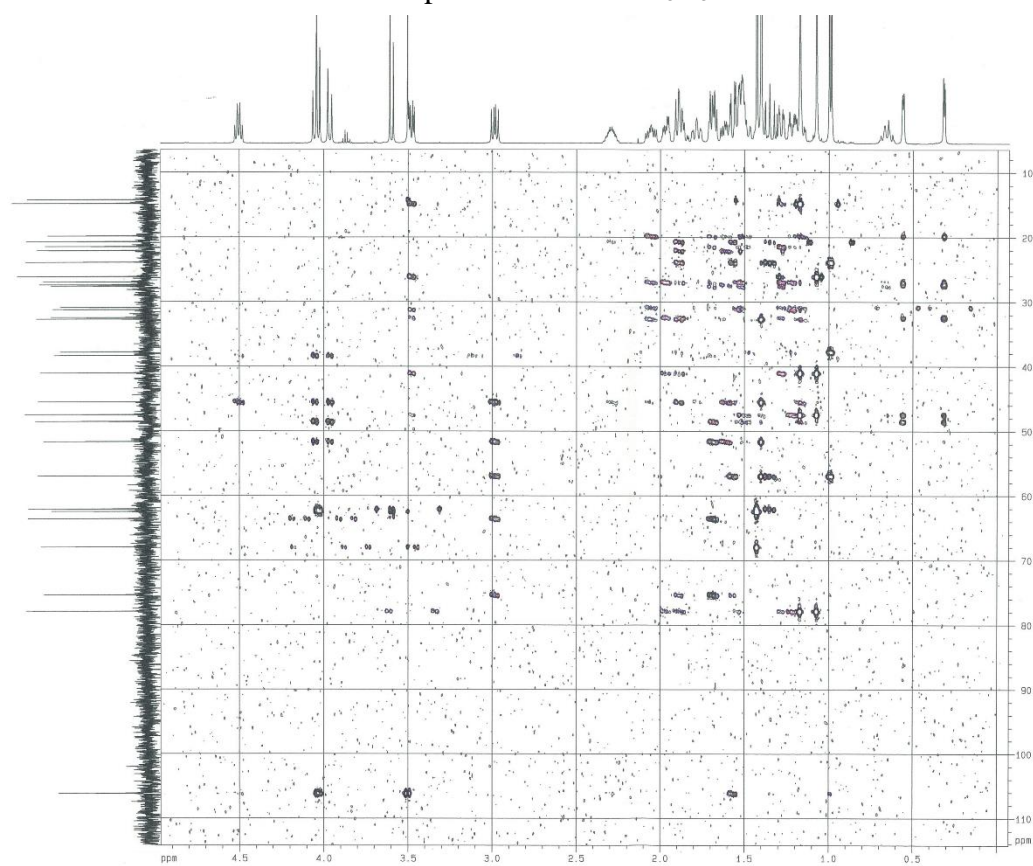

NOESY spectrum of **1a** in C<sub>5</sub>D<sub>5</sub>N

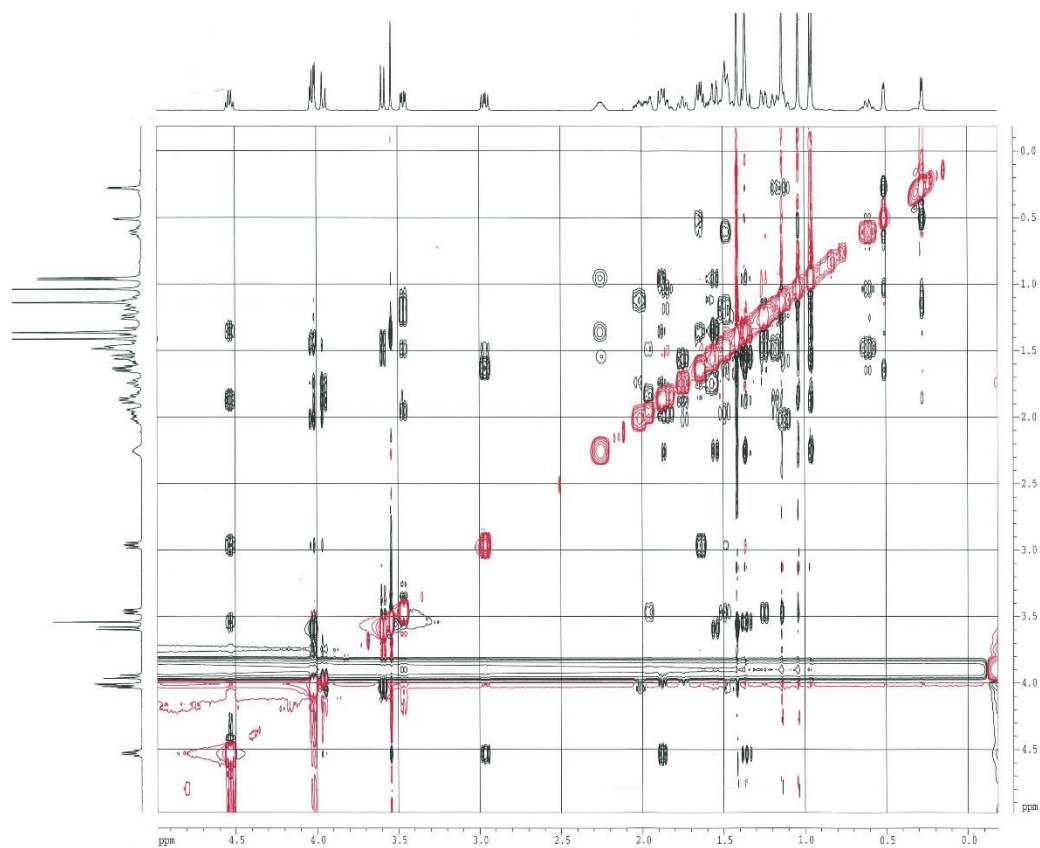

<sup>1</sup>H-NMR spectrum of **2** in C<sub>5</sub>D<sub>5</sub>N

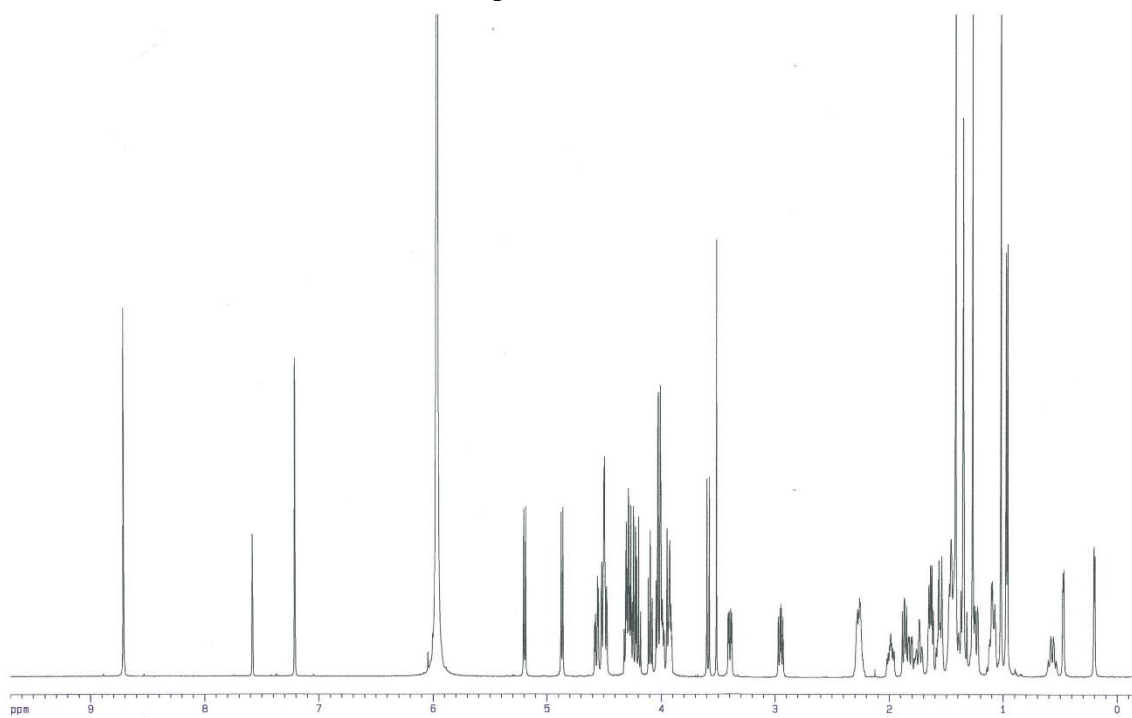

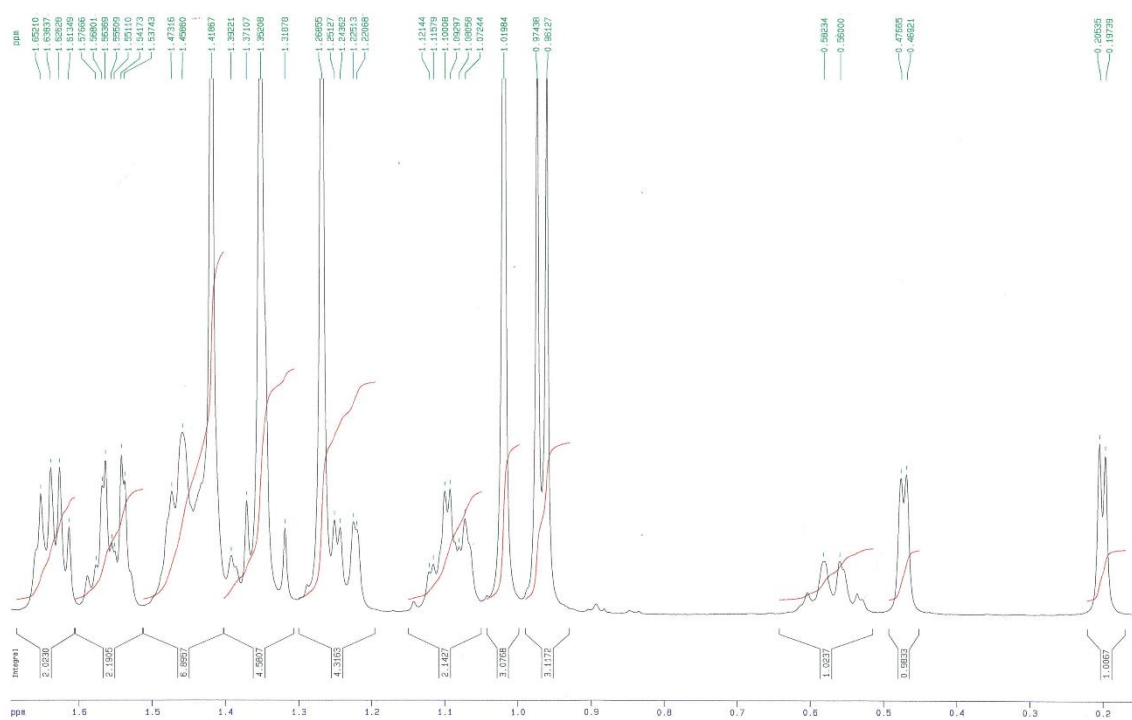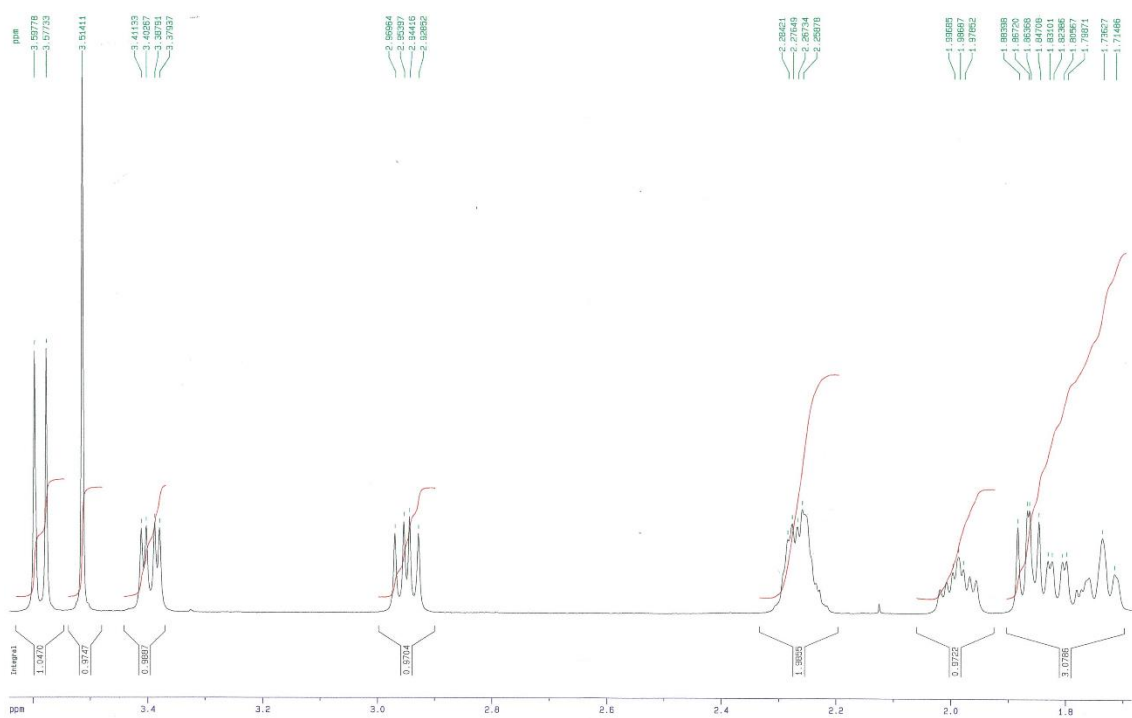

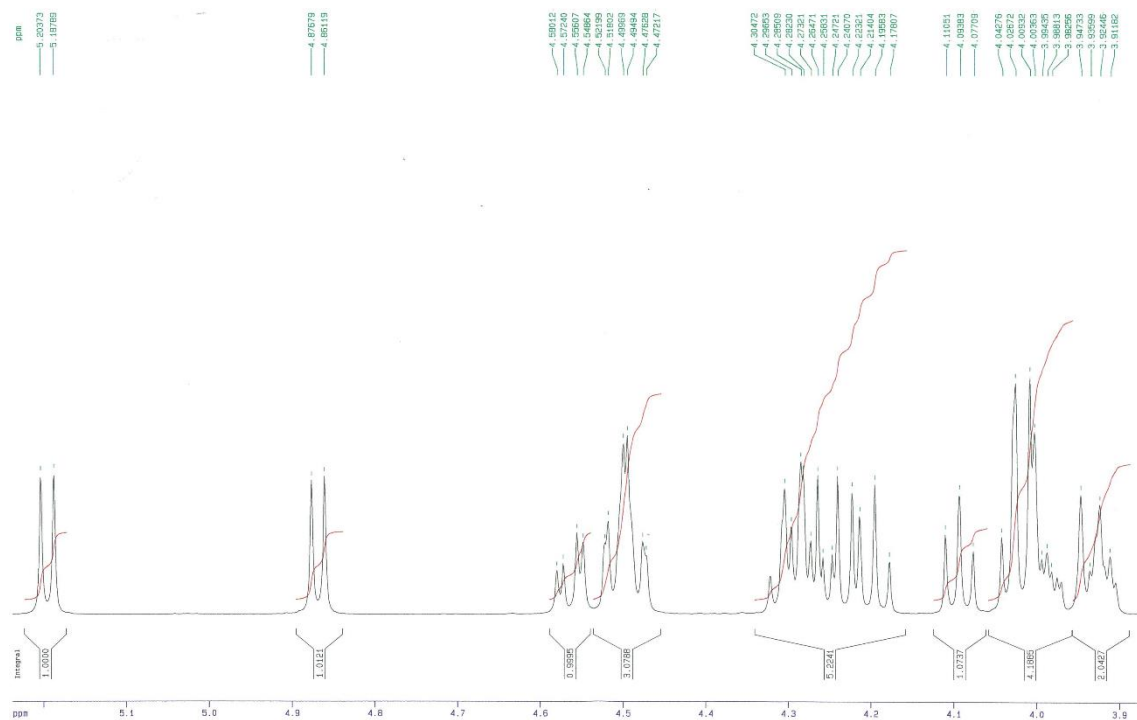

$^{13}\text{C}$ -NMR spectrum of **2** in  $\text{C}_5\text{D}_5\text{N}$

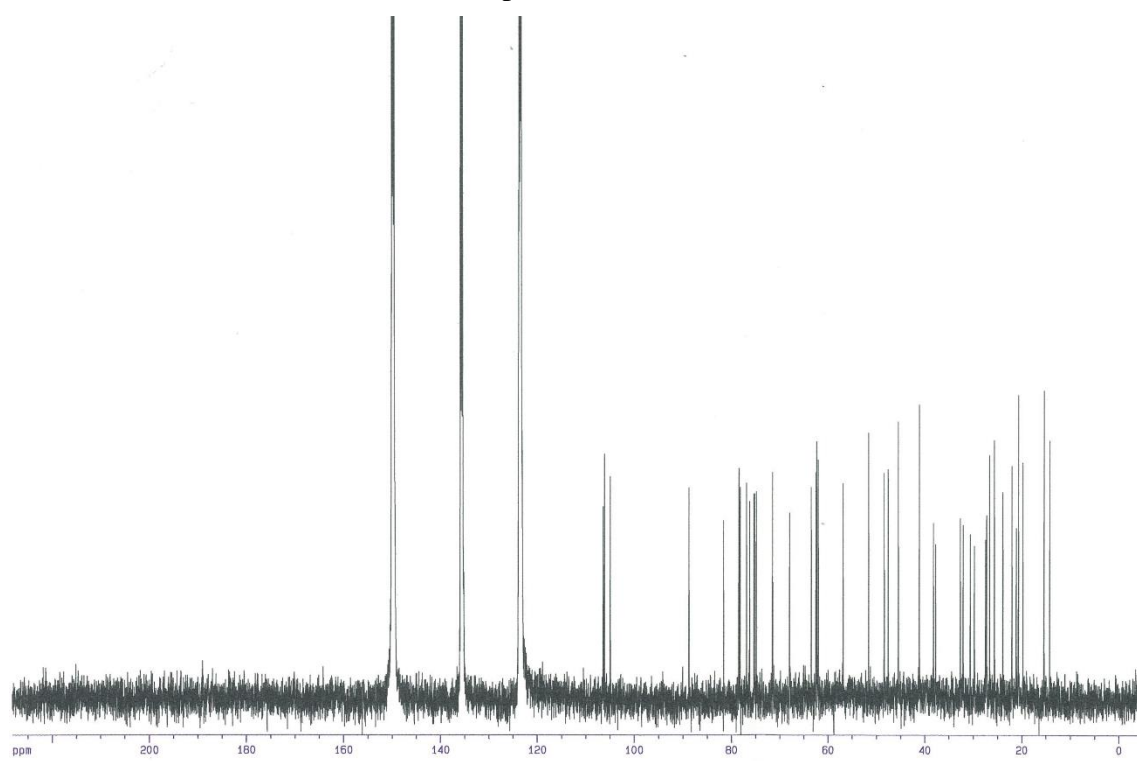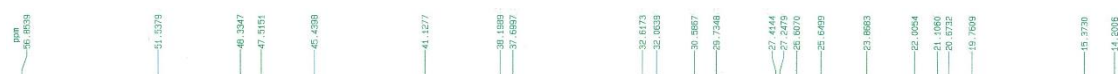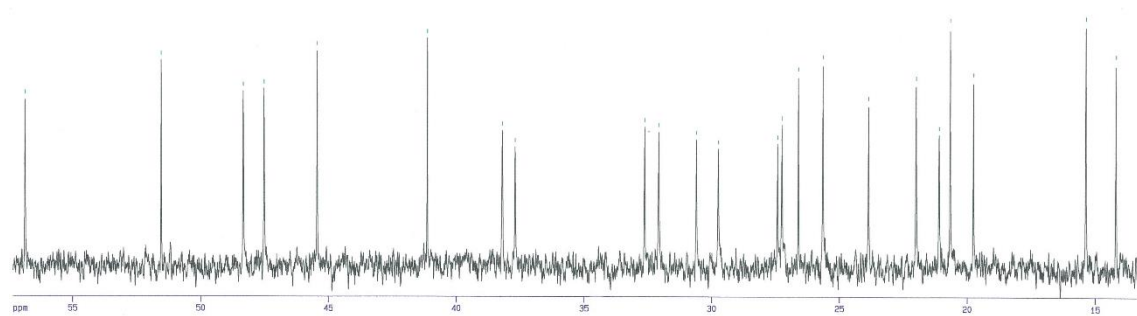

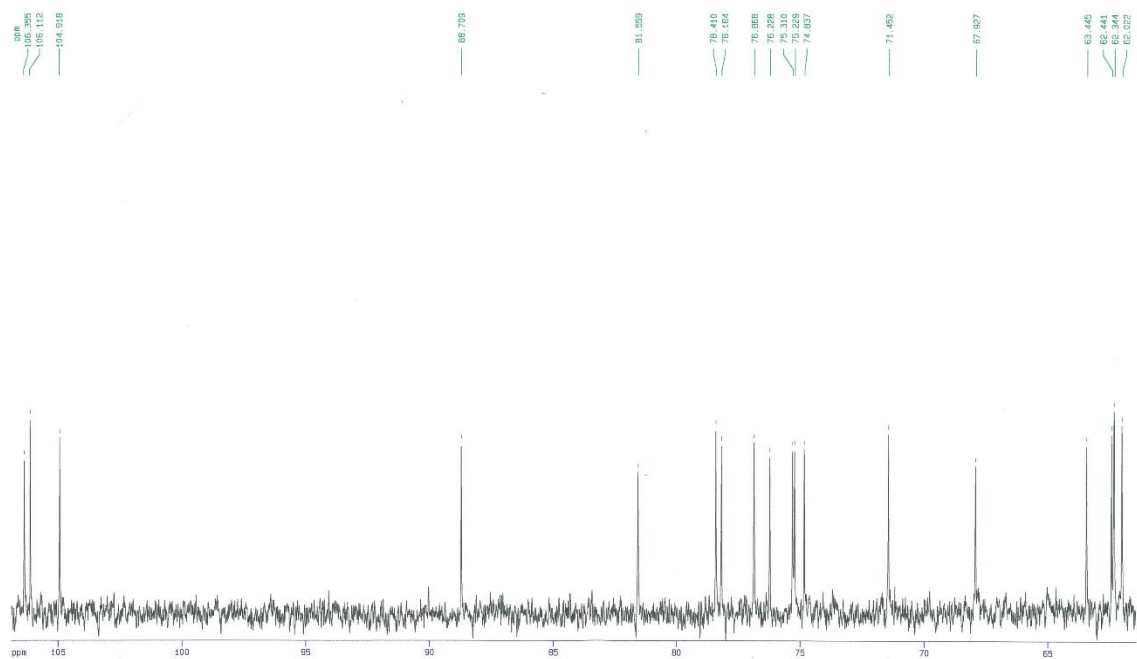

COSY spectrum of **2** in  $C_5D_5N$

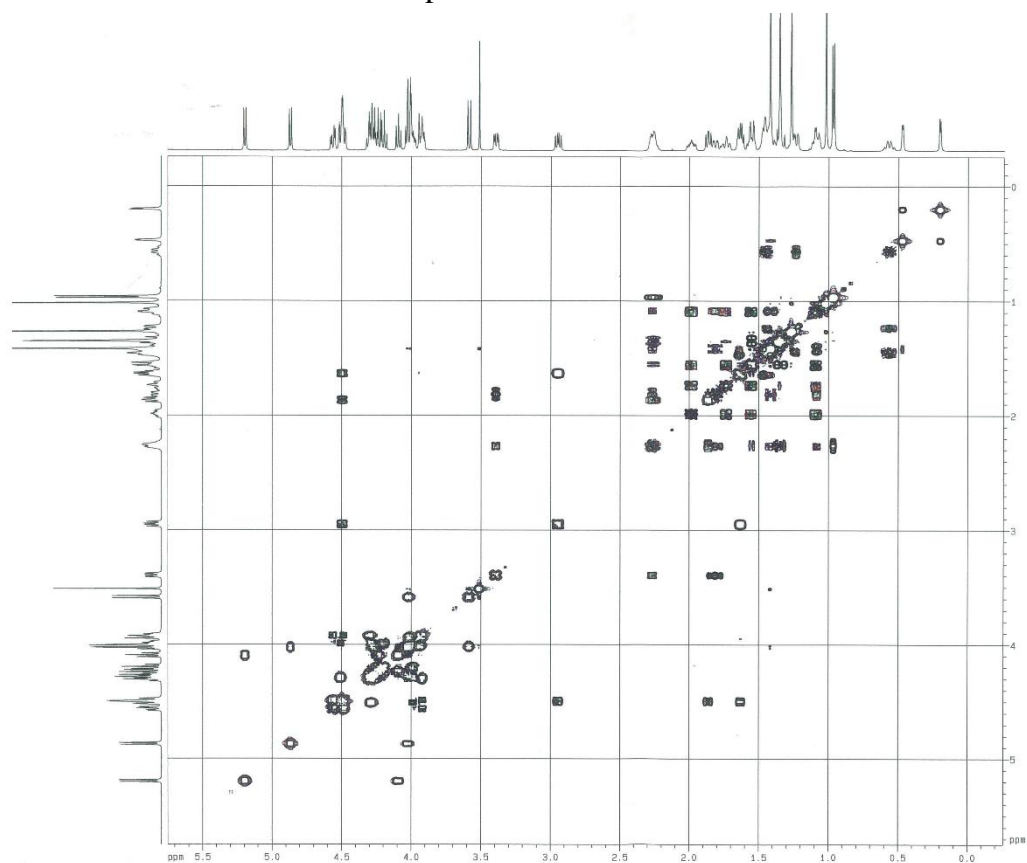



HMQC spectrum of **2** in C<sub>5</sub>D<sub>5</sub>N

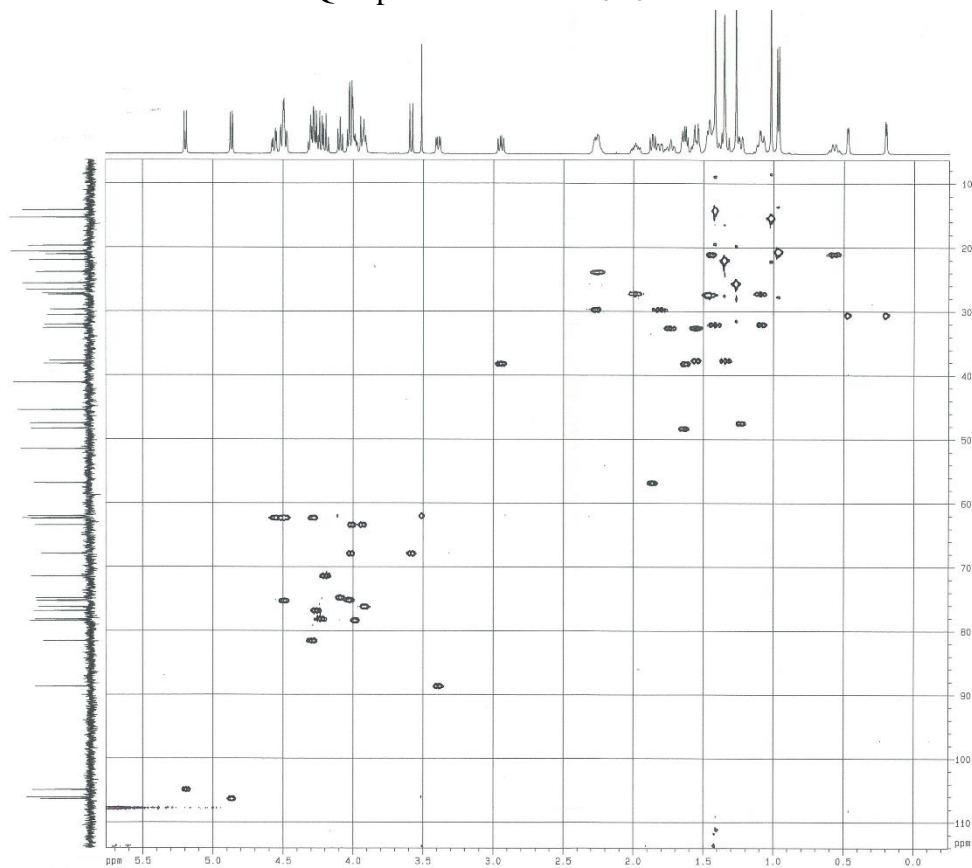

HMBC spectrum of **2** in C<sub>5</sub>D<sub>5</sub>N

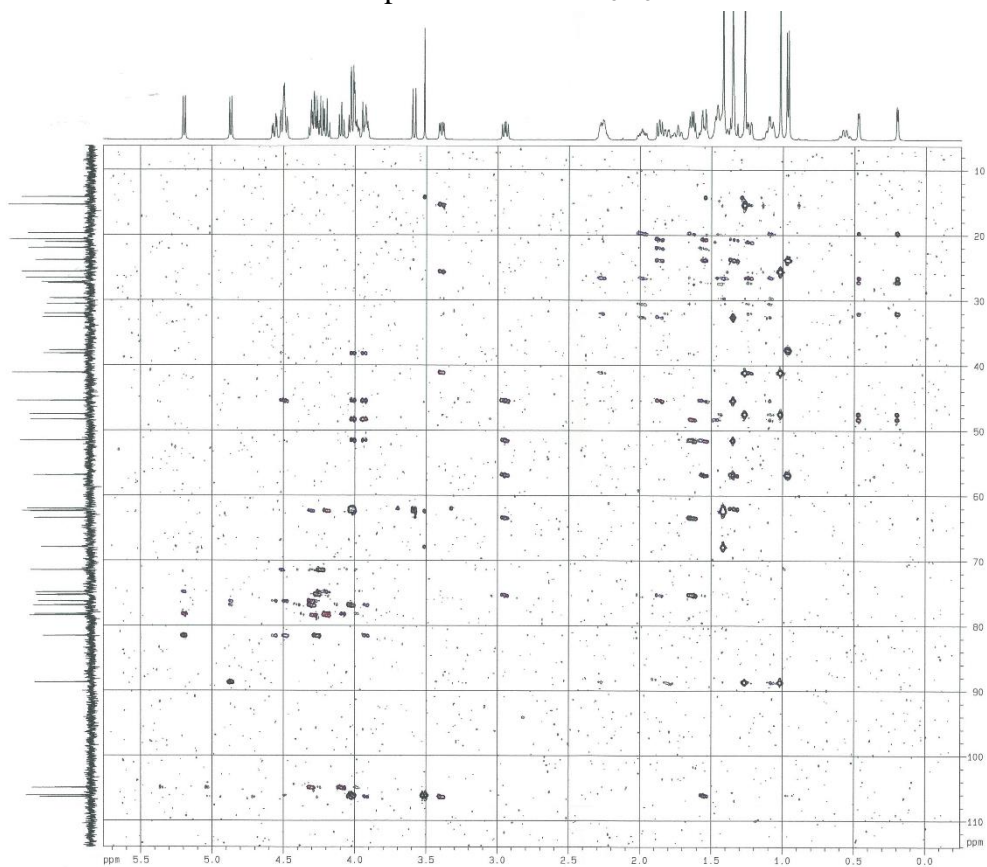



NOESY spectrum of **2** in C<sub>5</sub>D<sub>5</sub>N

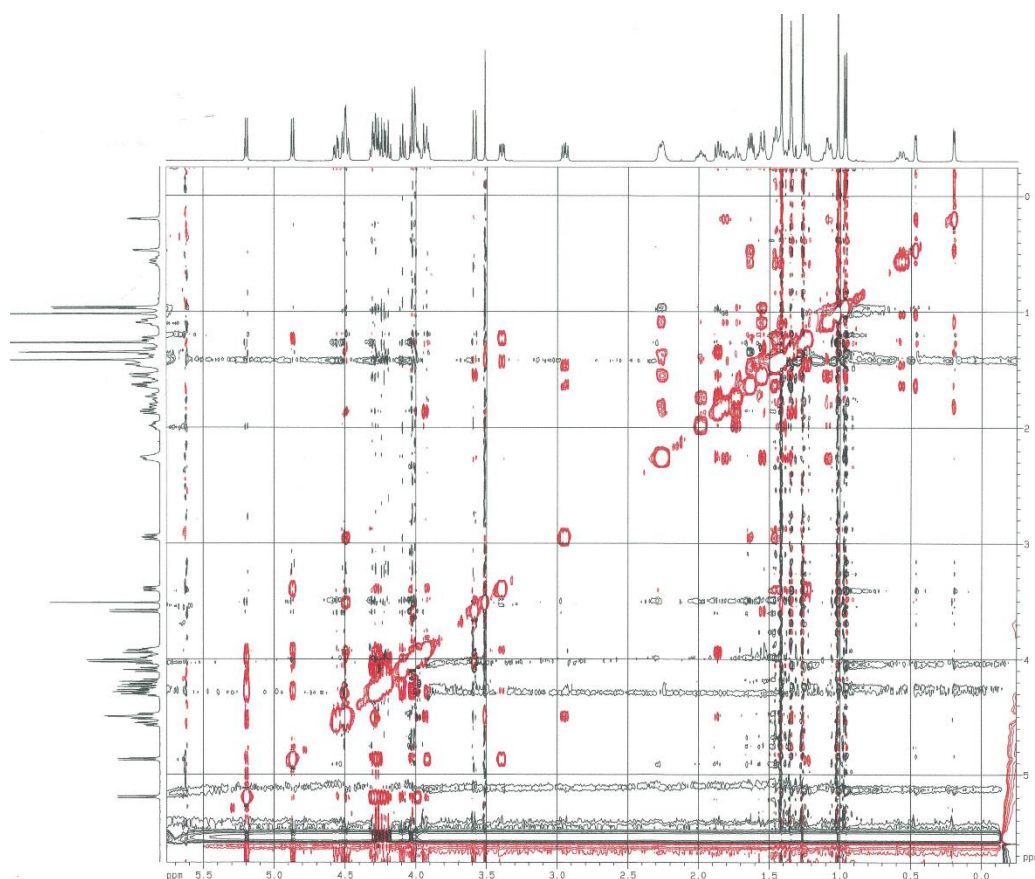

<sup>1</sup>H-NMR spectrum of **3** in C<sub>5</sub>D<sub>5</sub>N

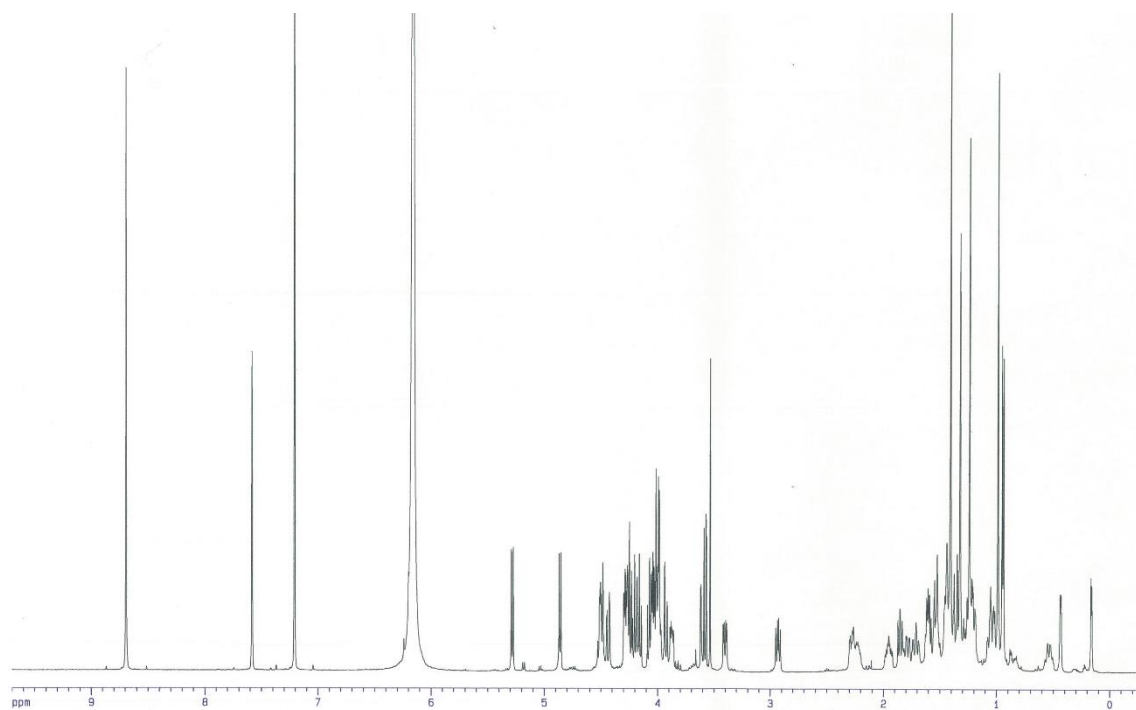

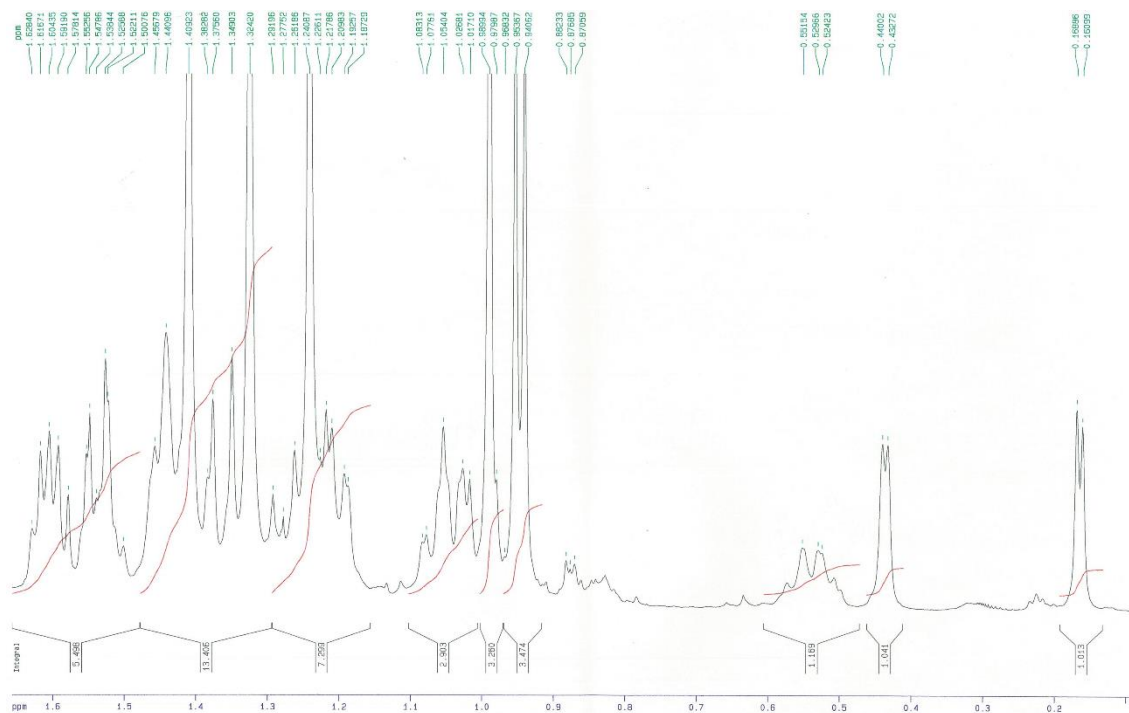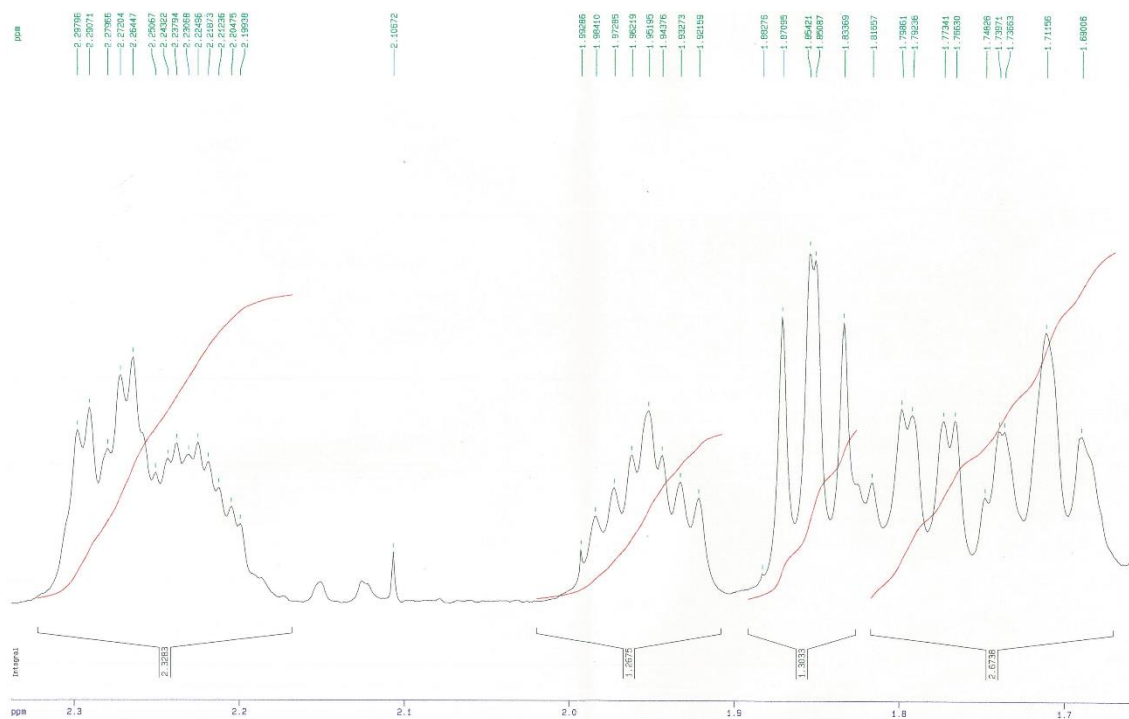

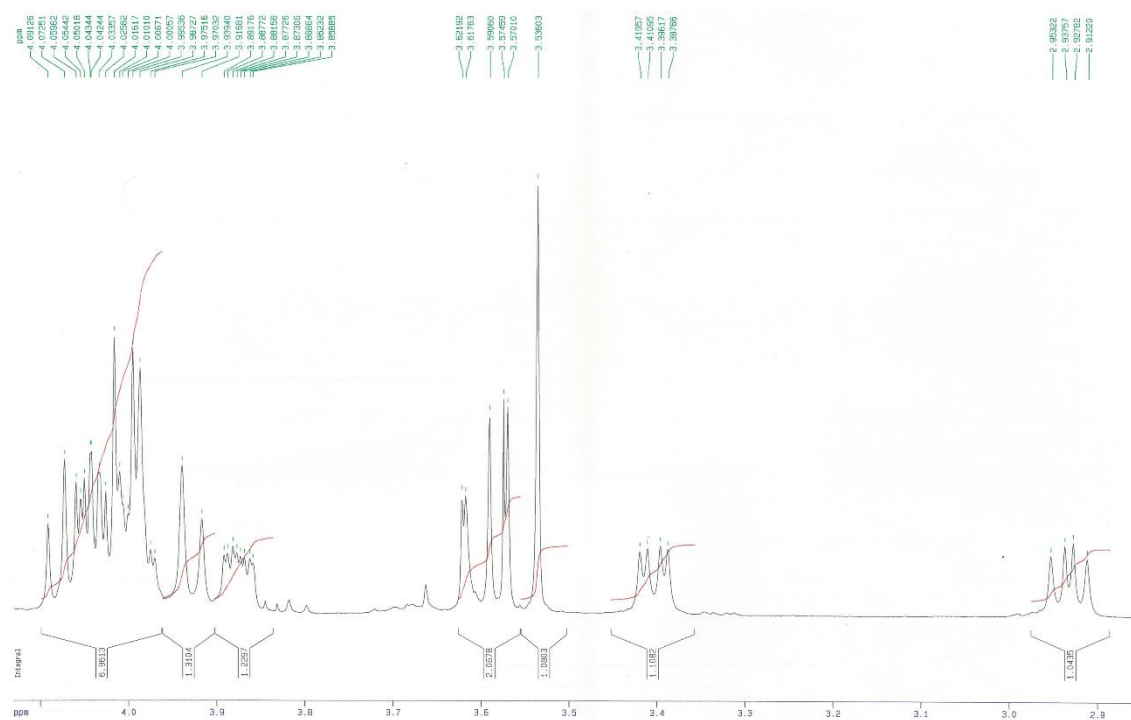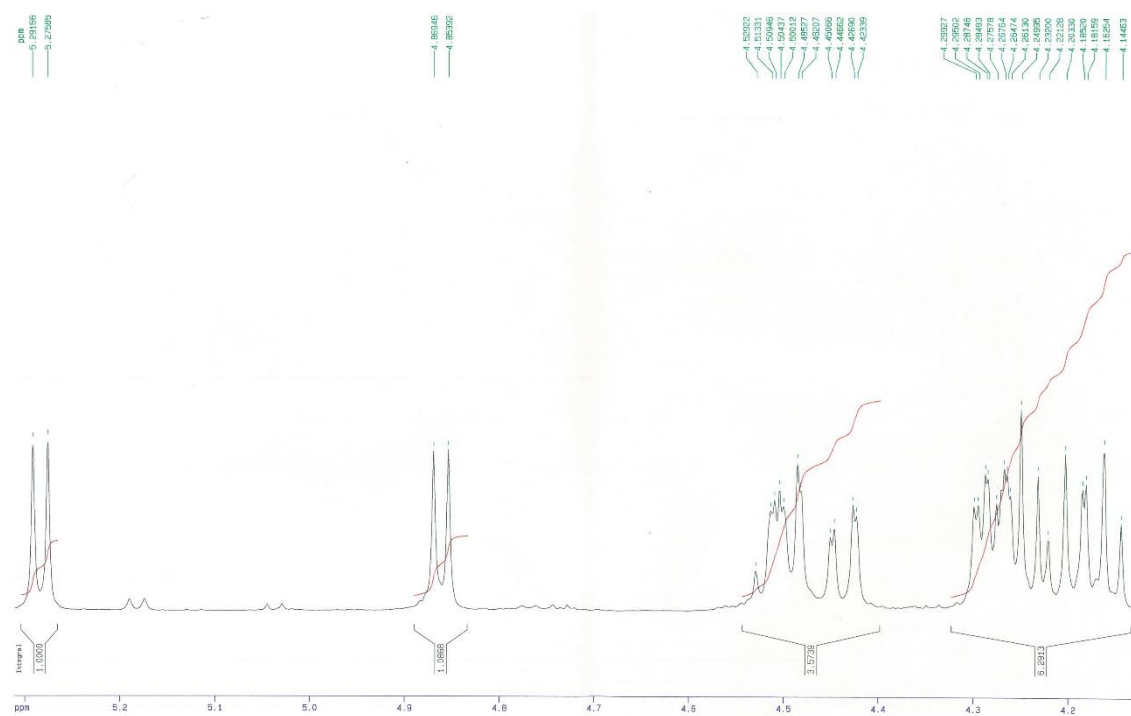

$^{13}\text{C}$ -NMR spectrum of **3** in  $\text{C}_5\text{D}_5\text{N}$

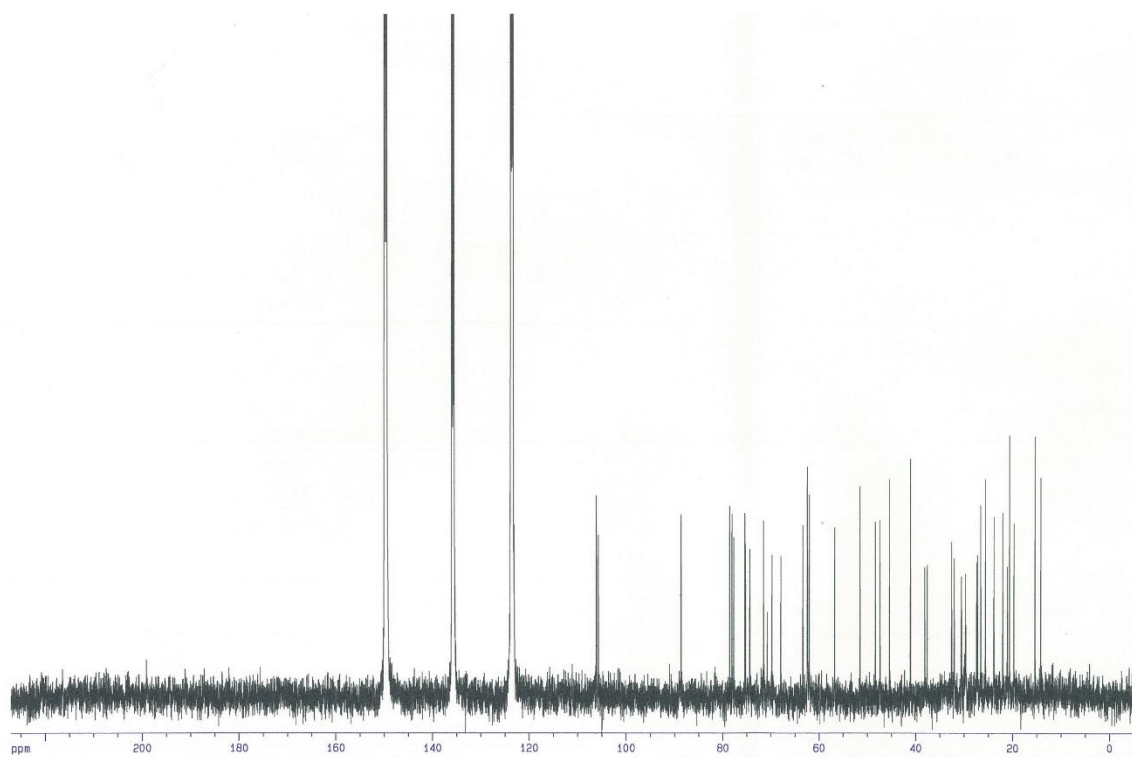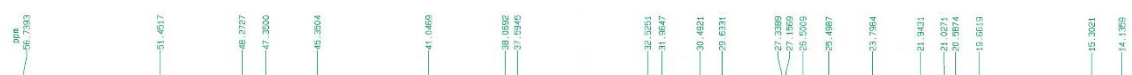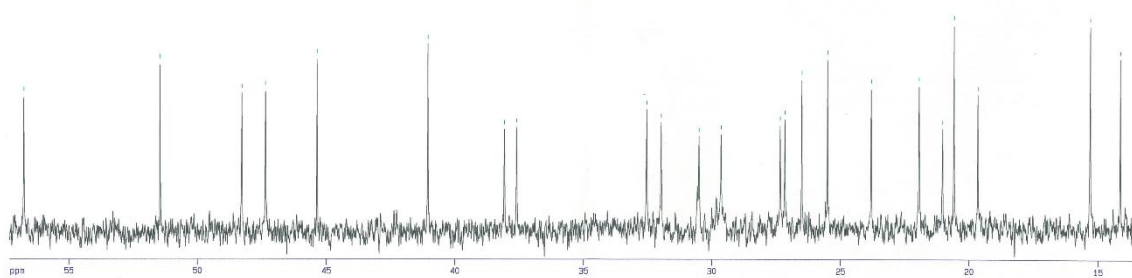

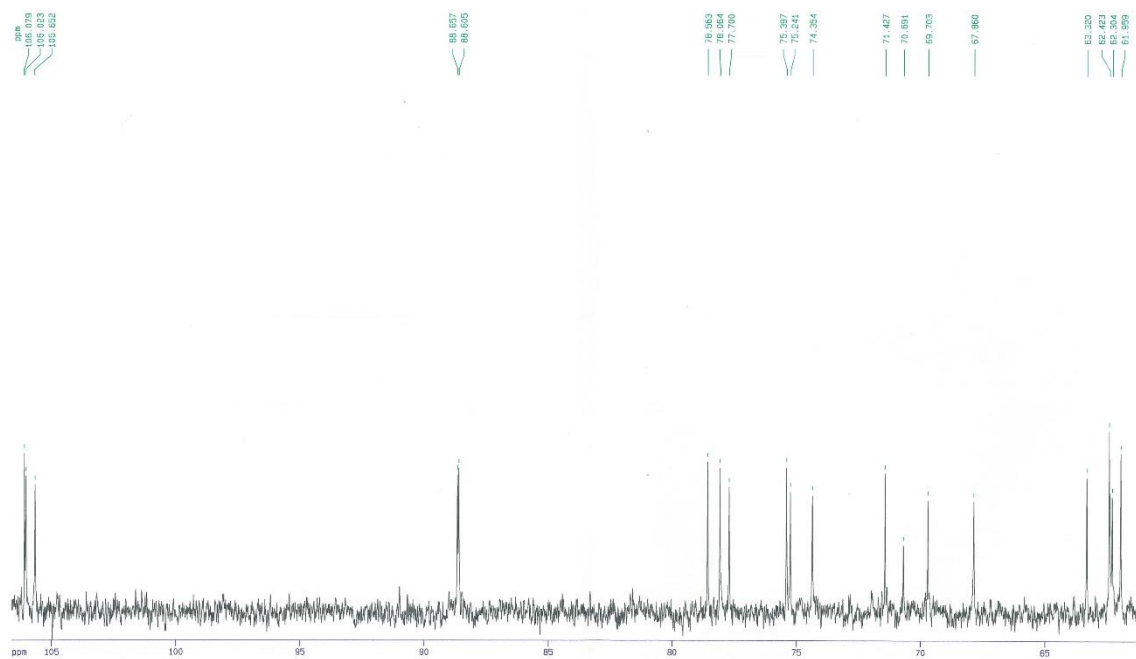

COSY spectrum of **3** in C<sub>5</sub>D<sub>5</sub>N

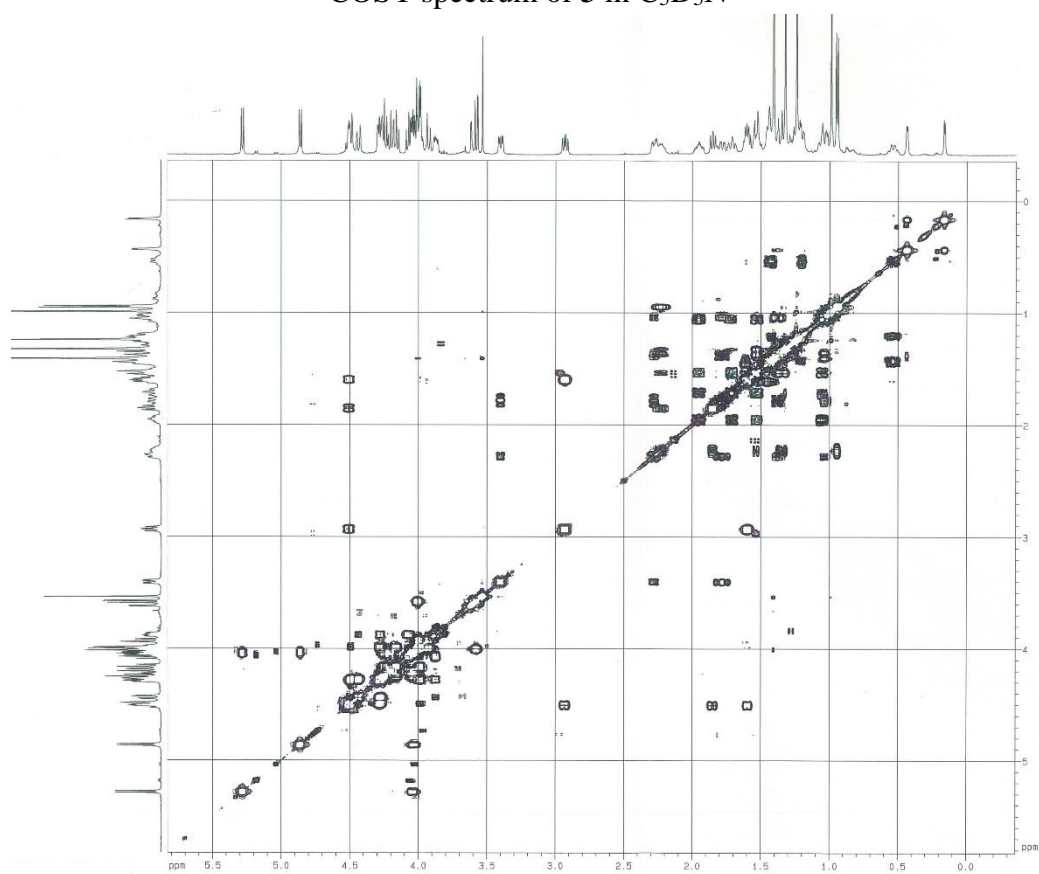

HMQC spectrum of **3** in C<sub>5</sub>D<sub>5</sub>N

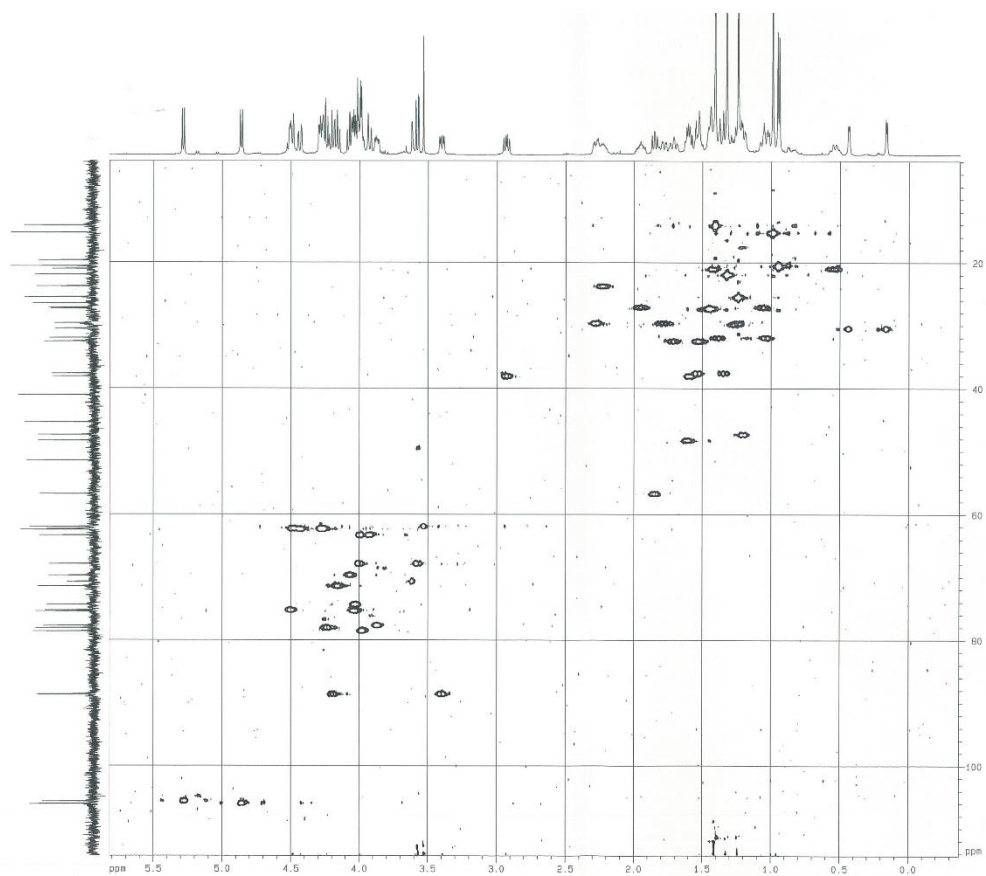

HMBC spectrum of **3** in C<sub>5</sub>D<sub>5</sub>N

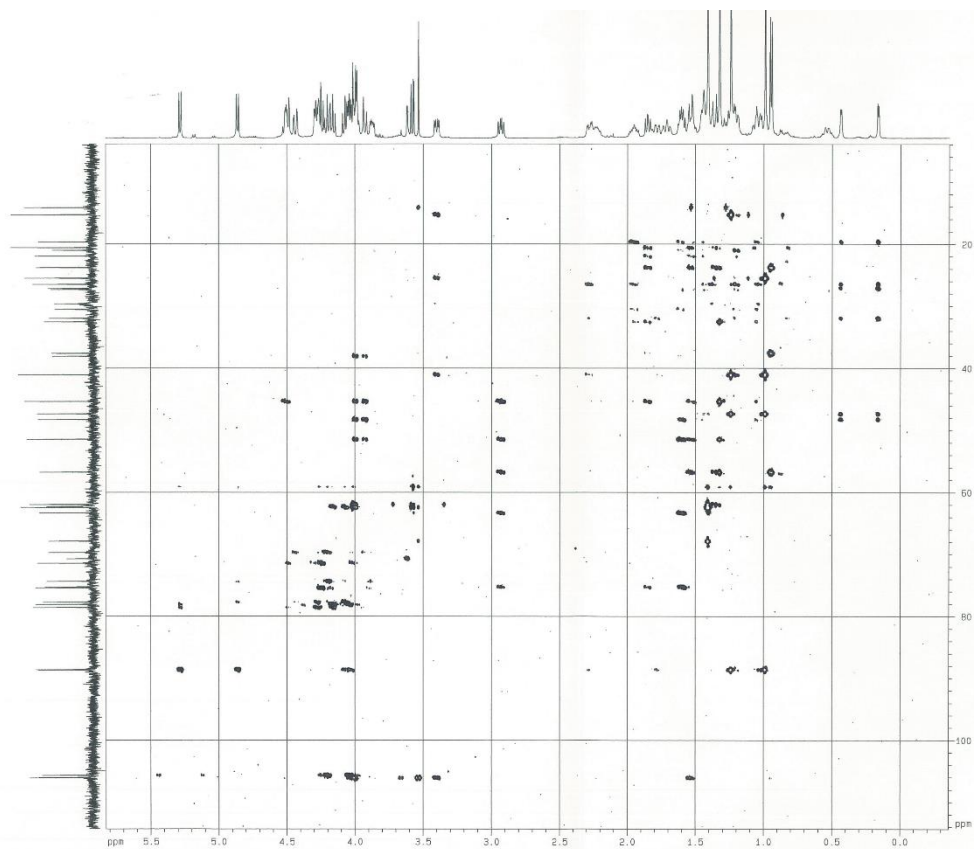



NOESY spectrum of **3** in C<sub>5</sub>D<sub>5</sub>N

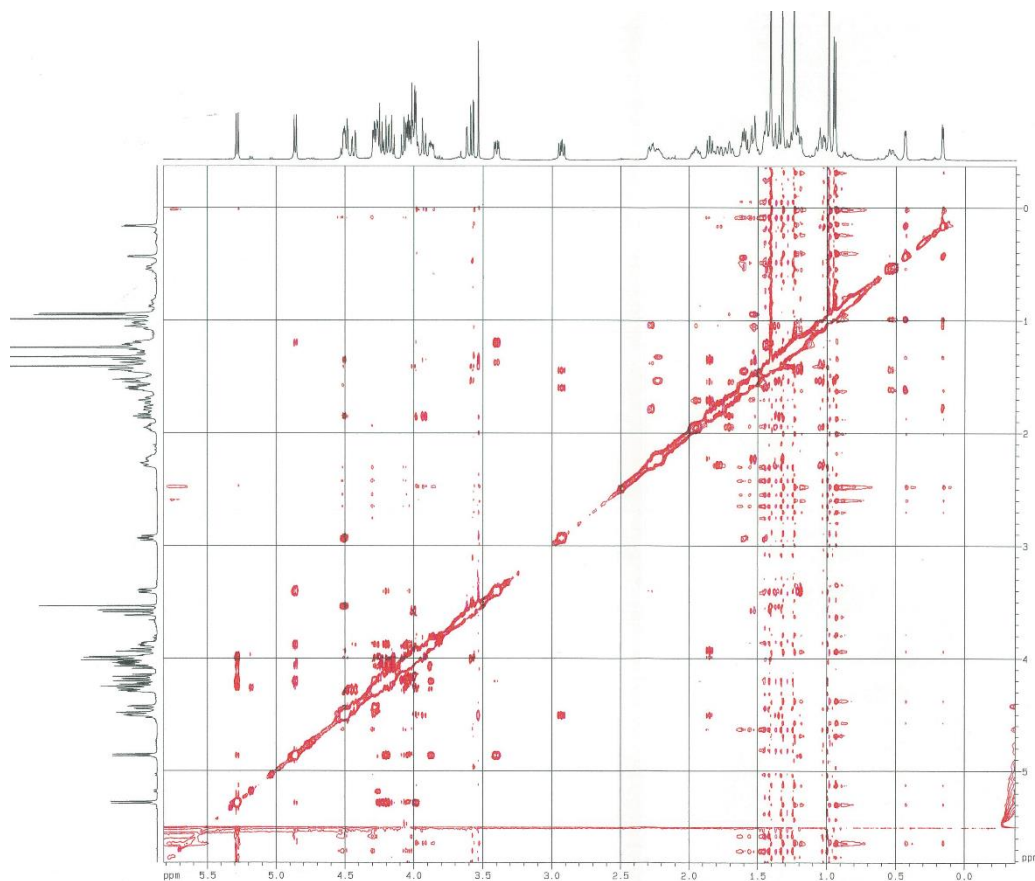

<sup>1</sup>H-NMR spectrum of **4** in C<sub>5</sub>D<sub>5</sub>N

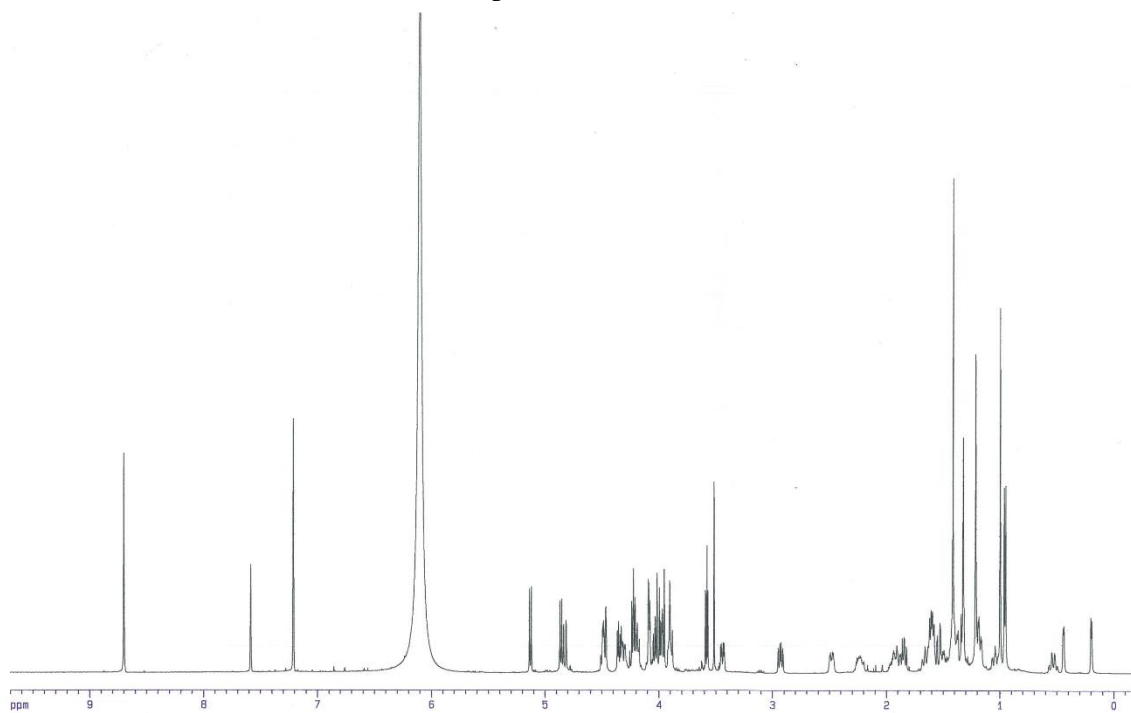

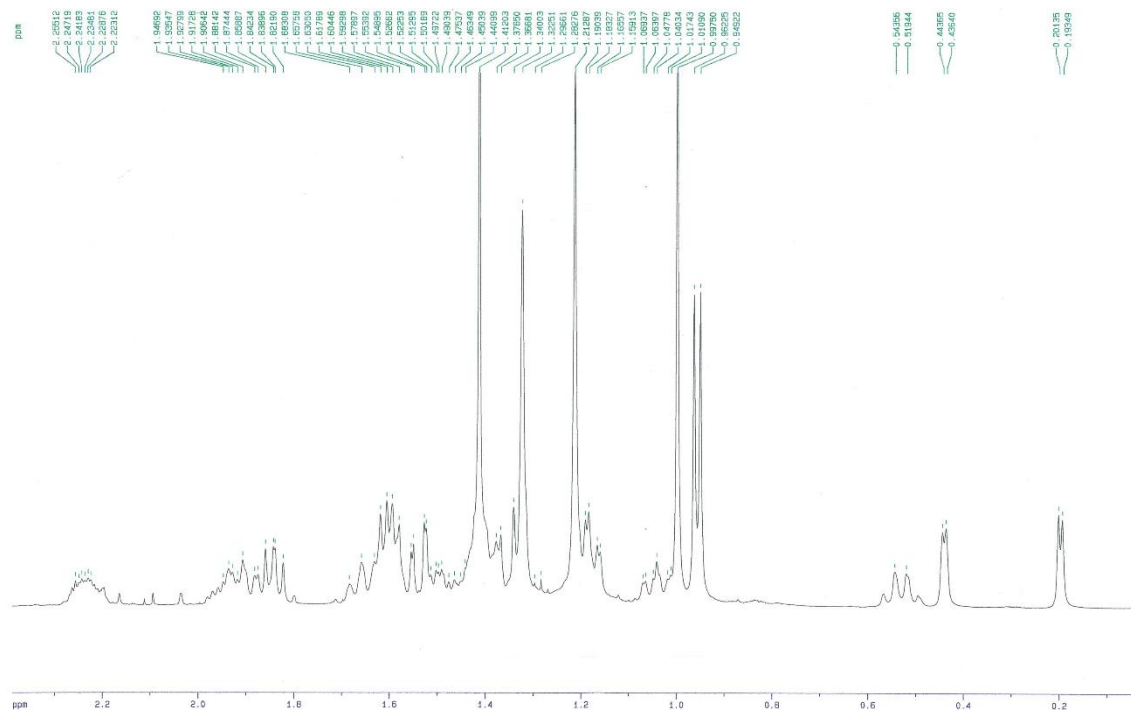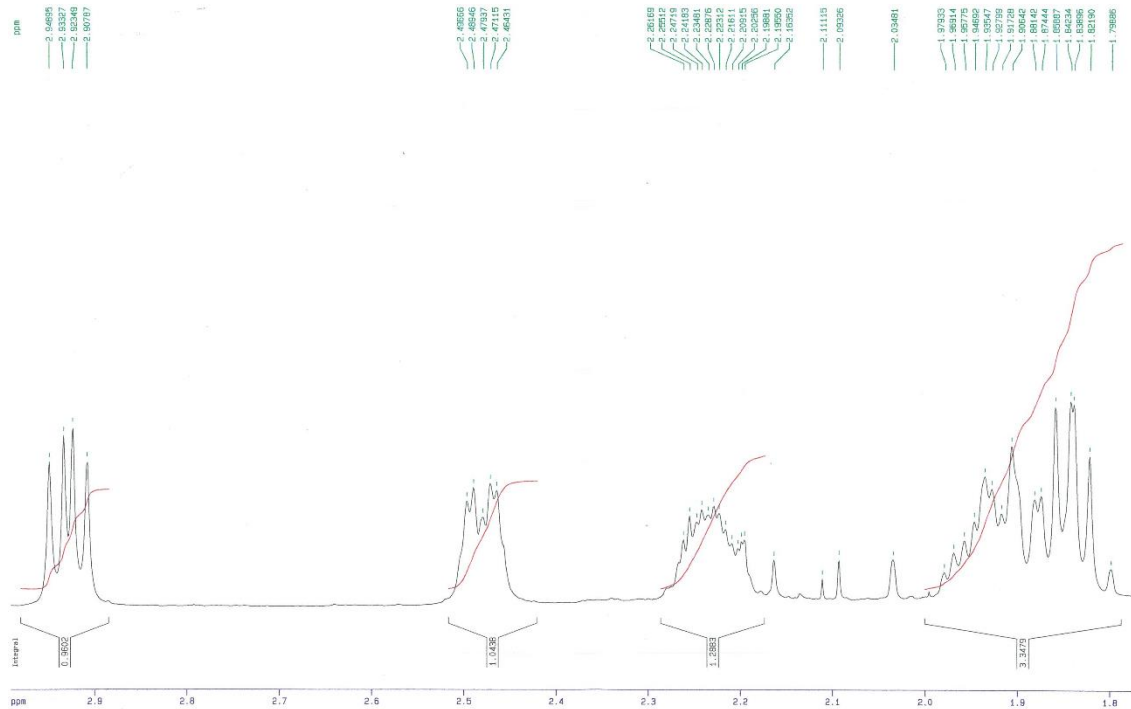



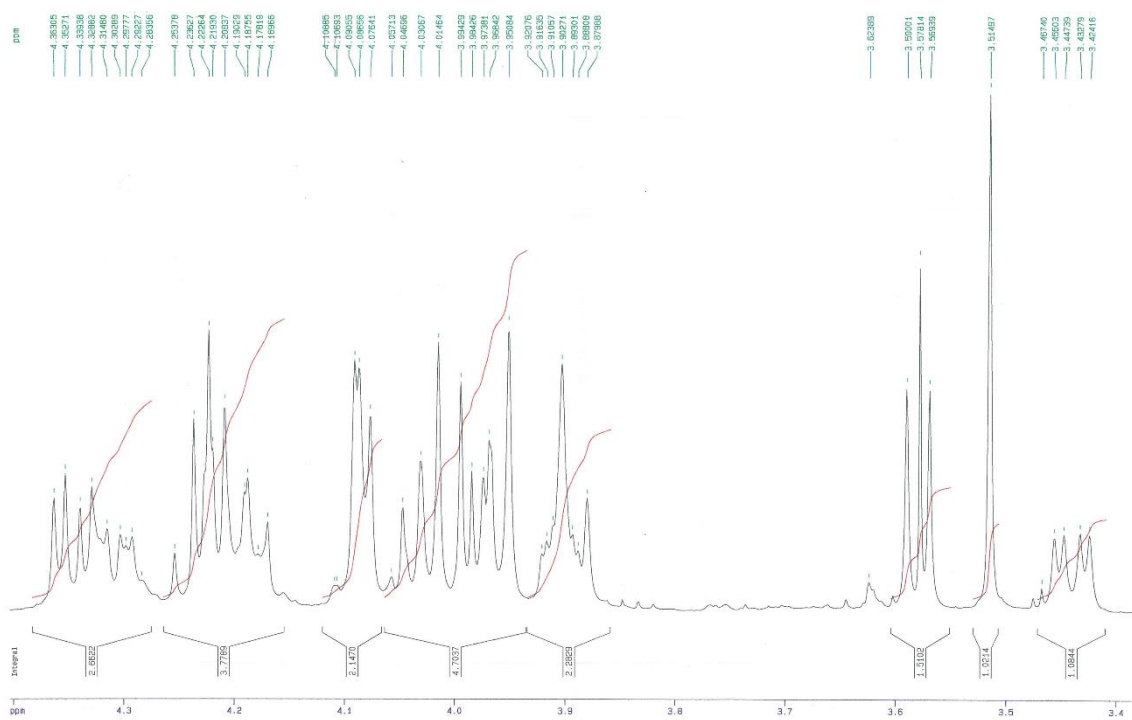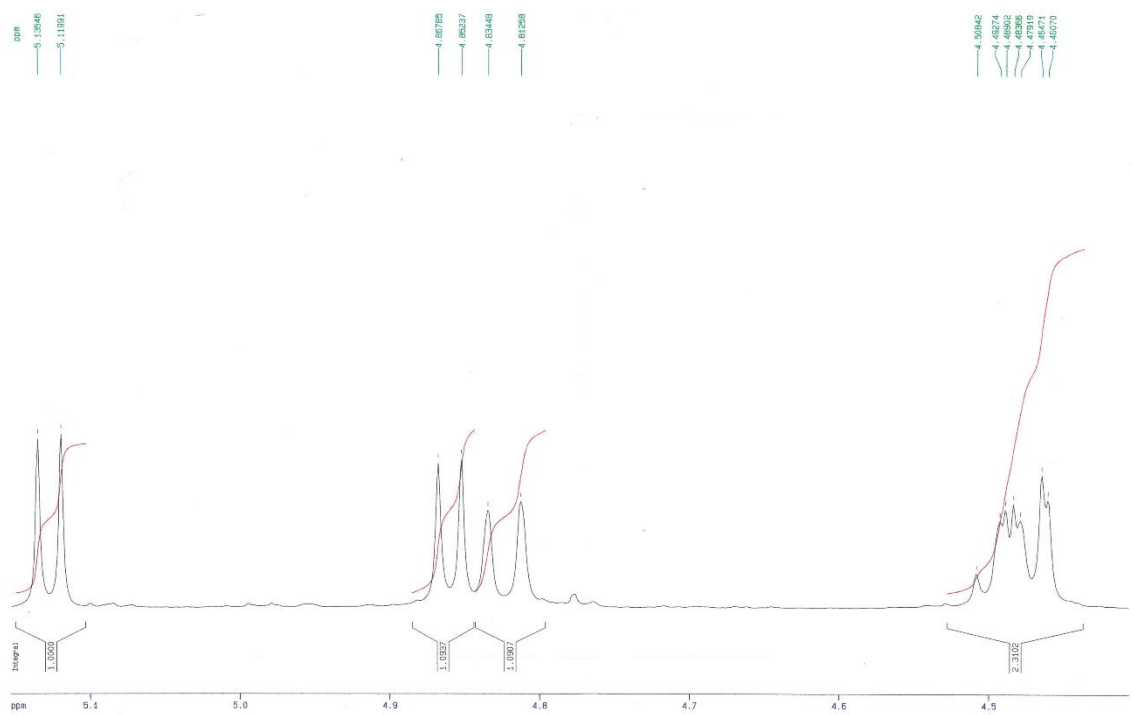

$^{13}\text{C}$ -NMR spectrum of **4** in  $\text{C}_5\text{D}_5\text{N}$

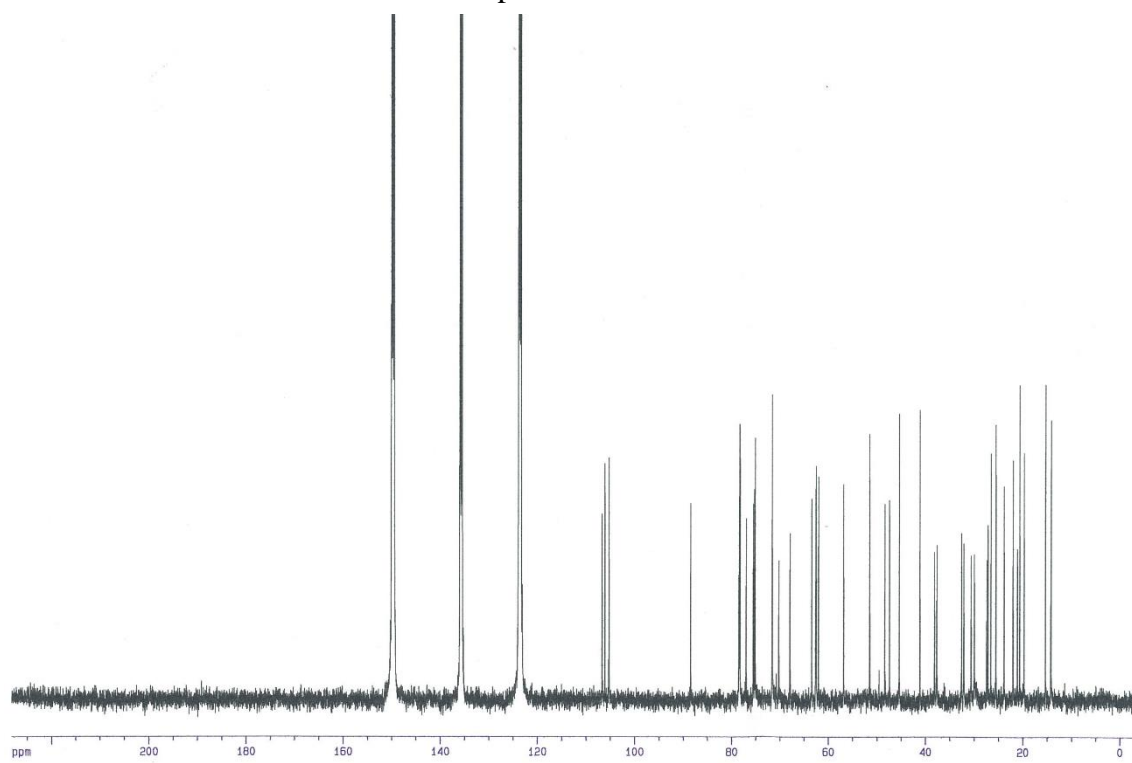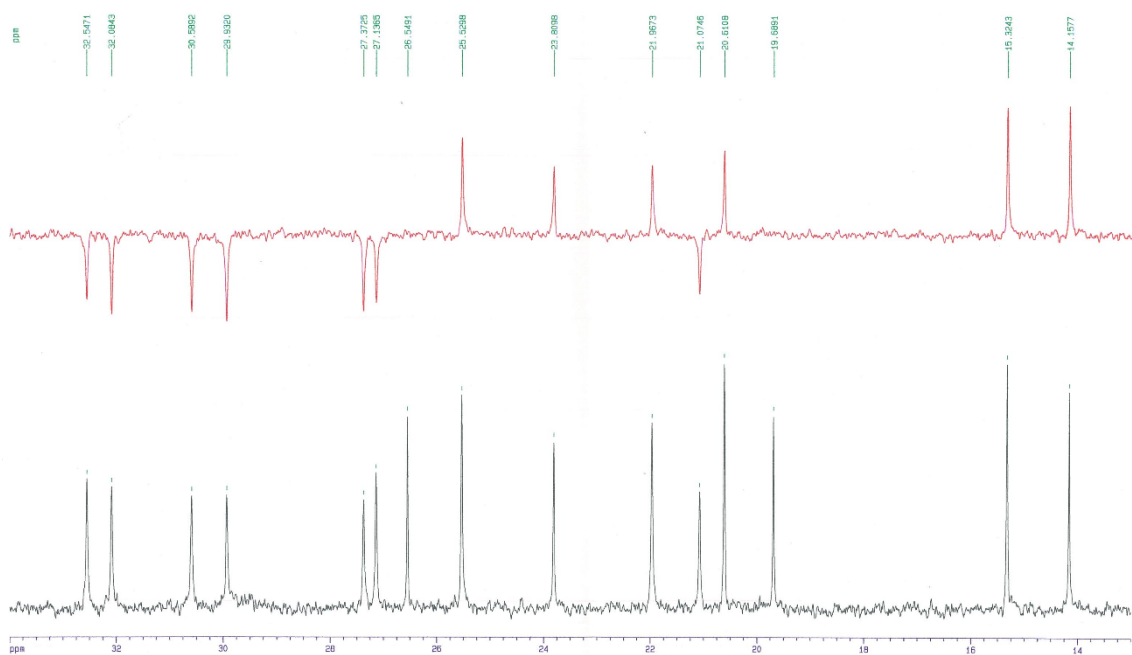

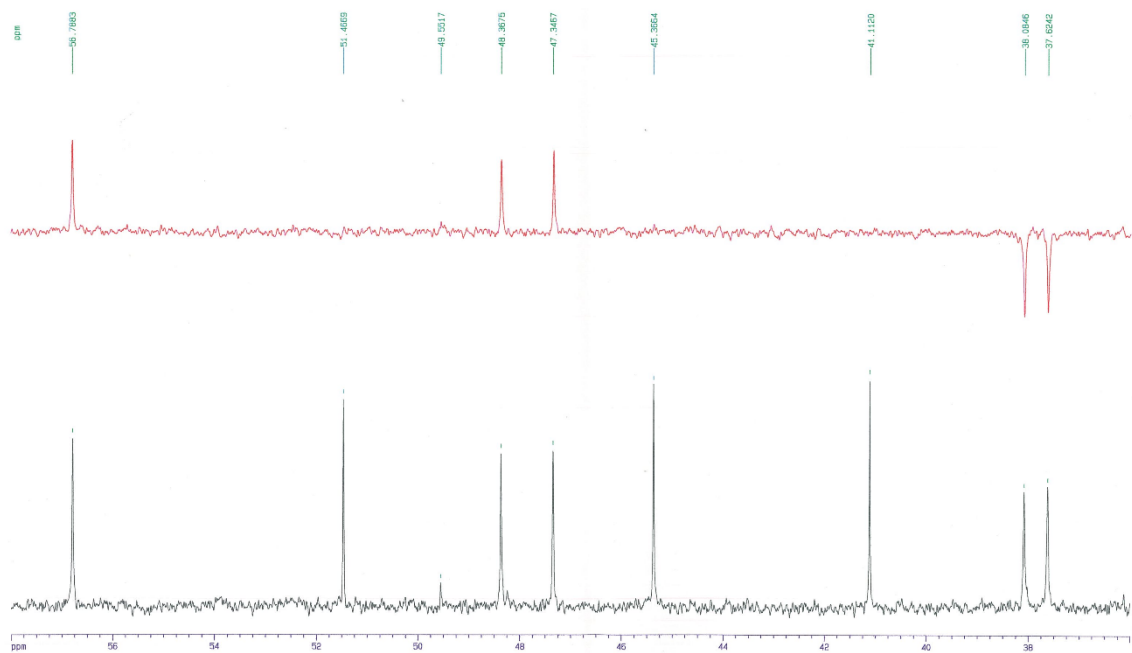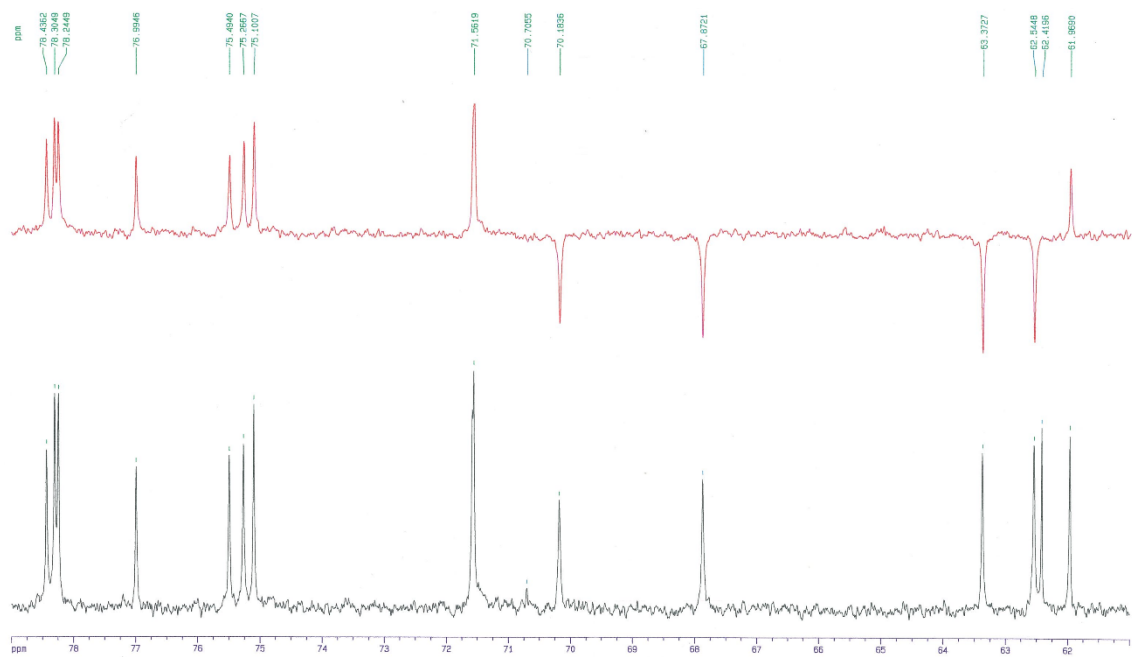

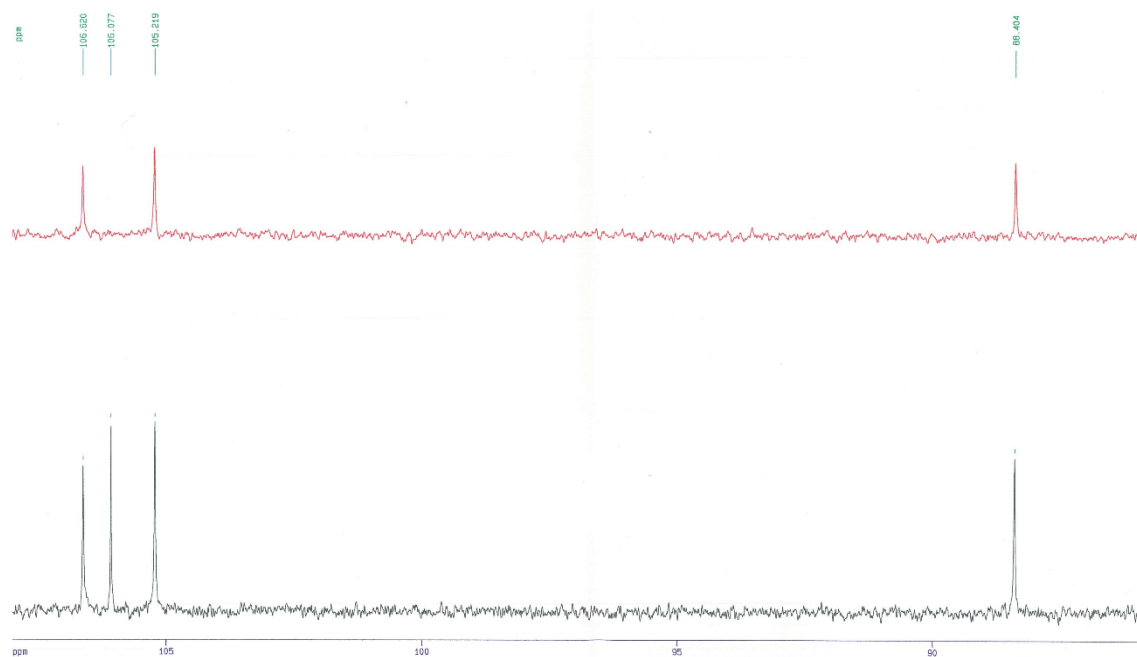

COSY spectrum of **4** in C<sub>5</sub>D<sub>5</sub>N

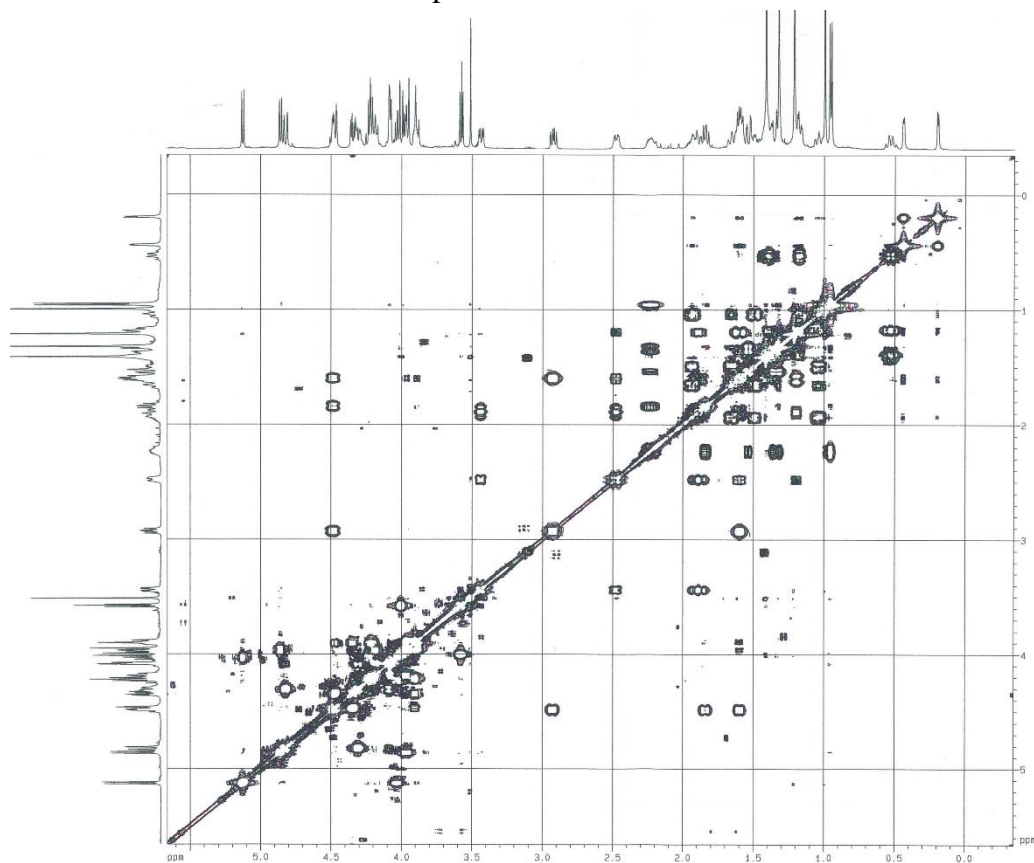

HMQC spectrum of **4** in C<sub>5</sub>D<sub>5</sub>N

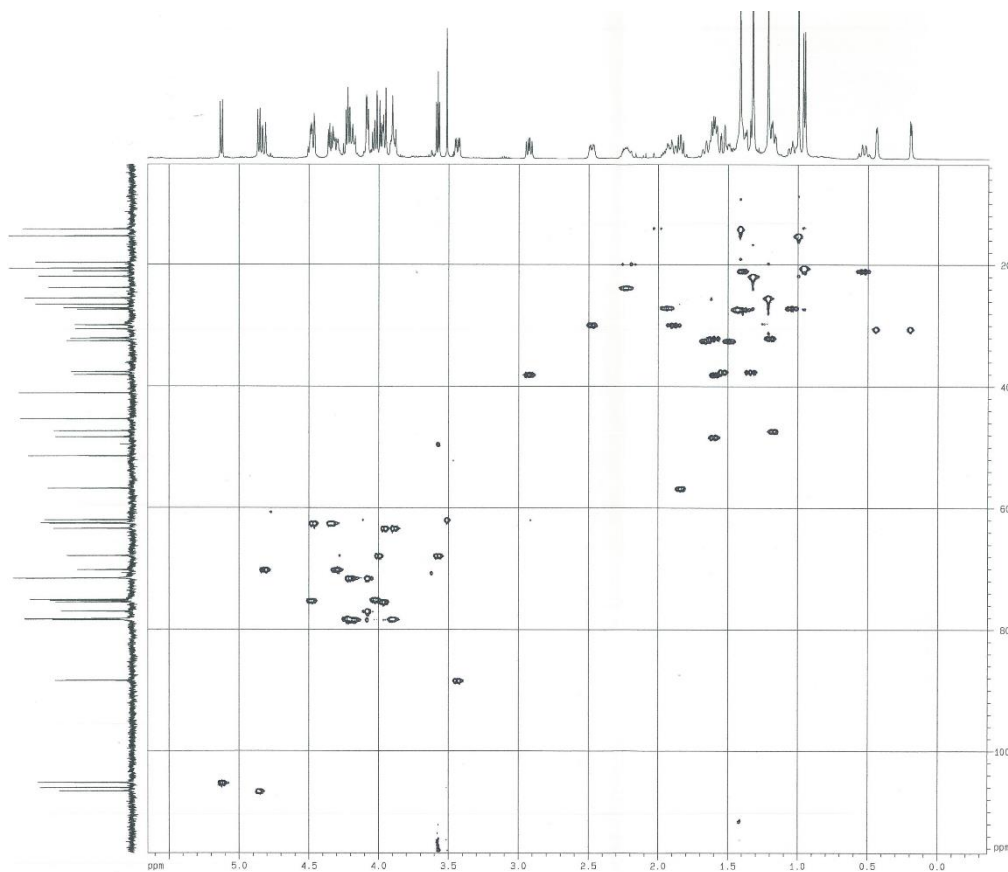

HMBC spectrum of **4** in C<sub>5</sub>D<sub>5</sub>N

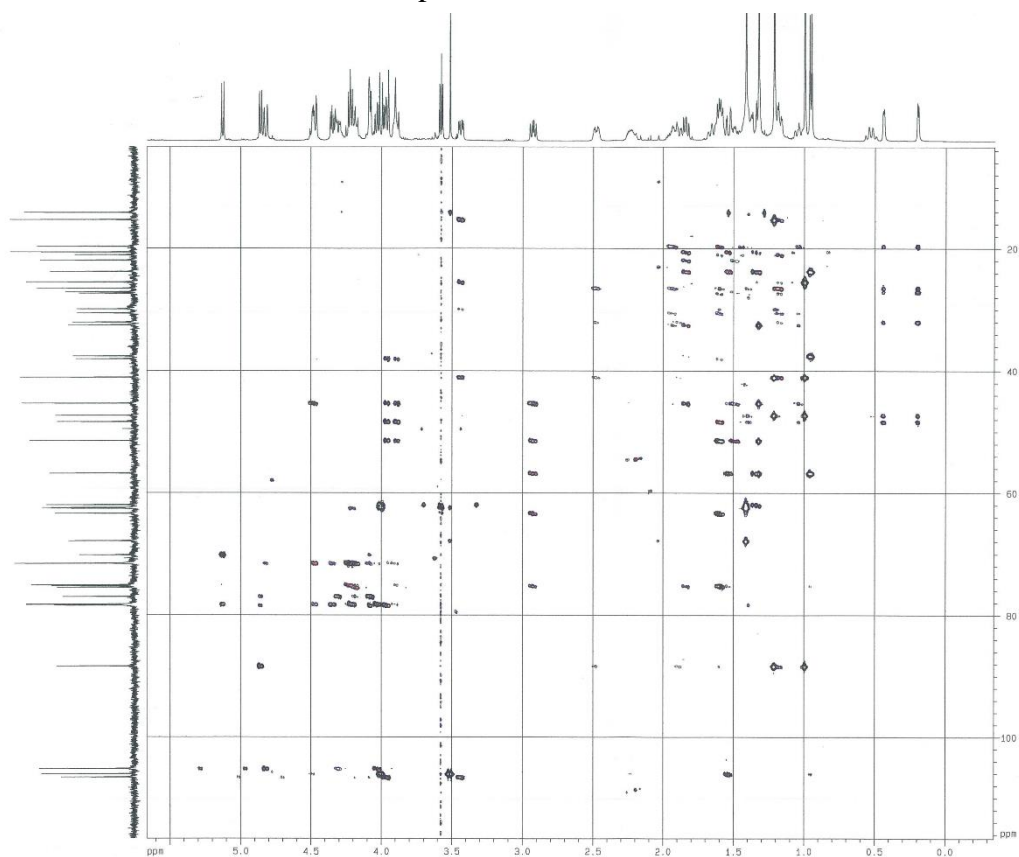

<sup>1</sup>H-NMR spectrum of **5** in C<sub>5</sub>D<sub>5</sub>N

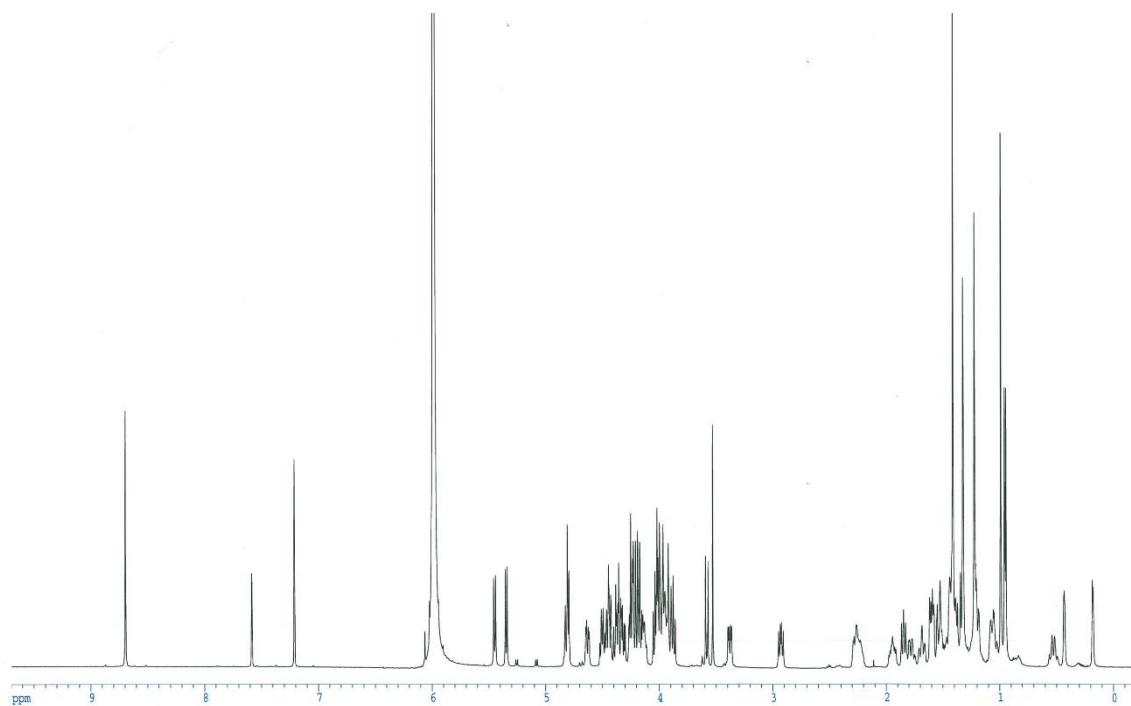



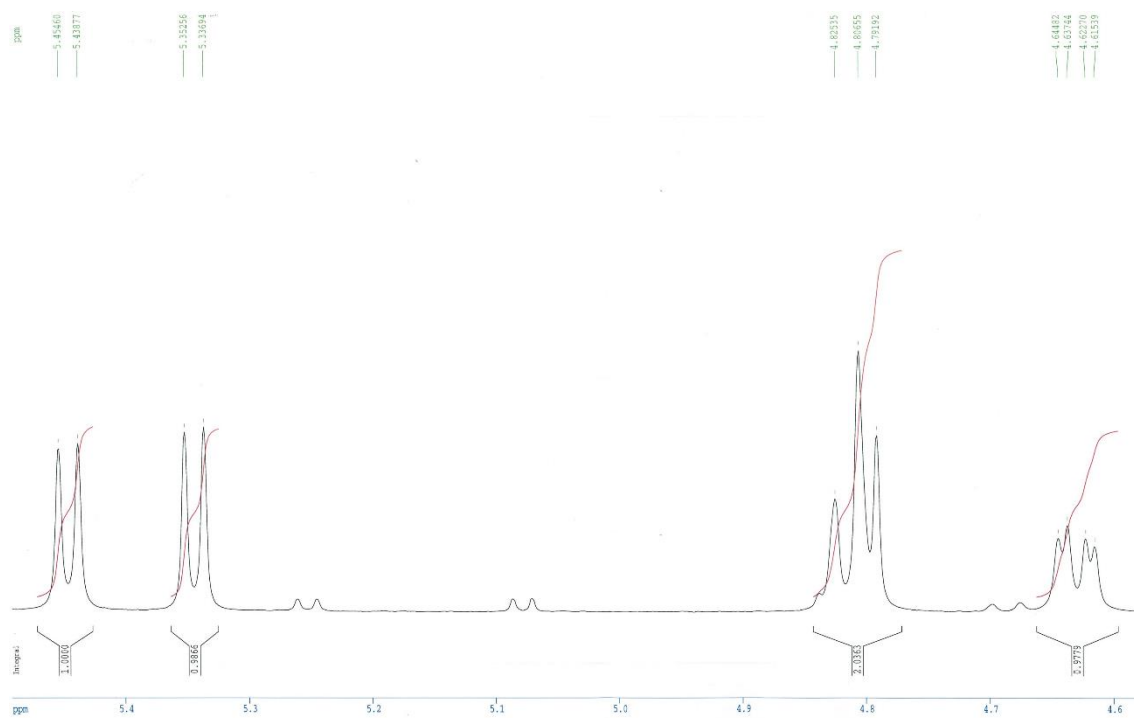

<sup>13</sup>C-NMR spectrum of **5** in C<sub>5</sub>D<sub>5</sub>N

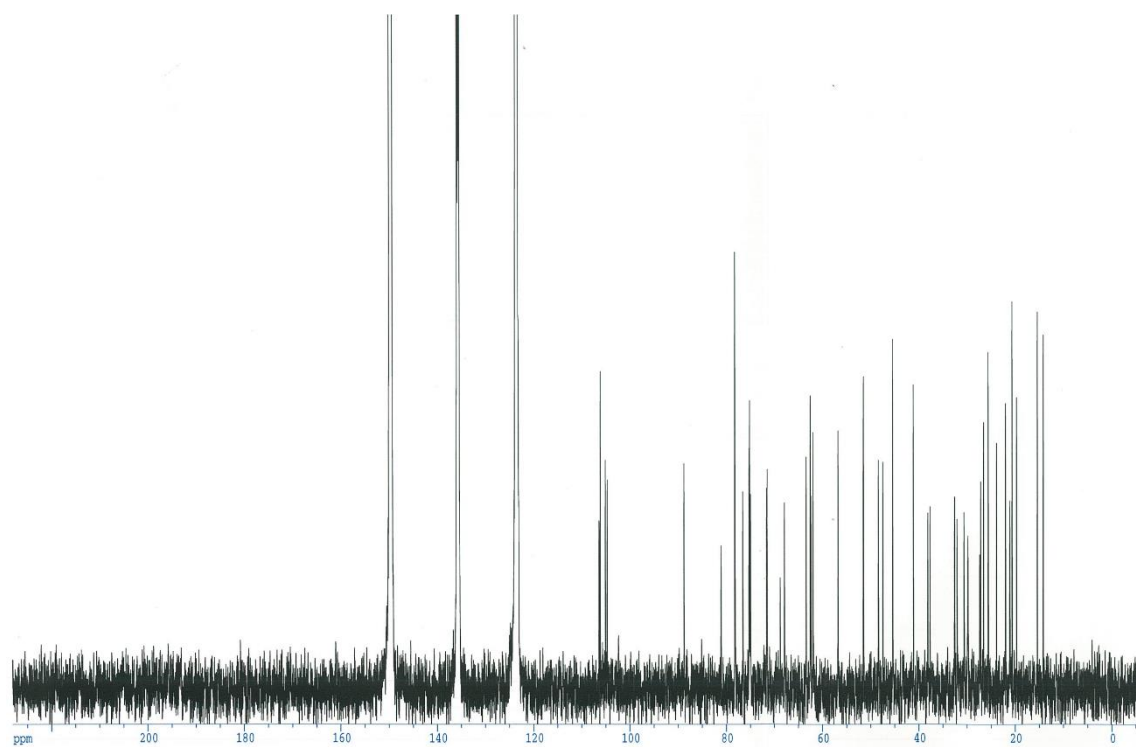



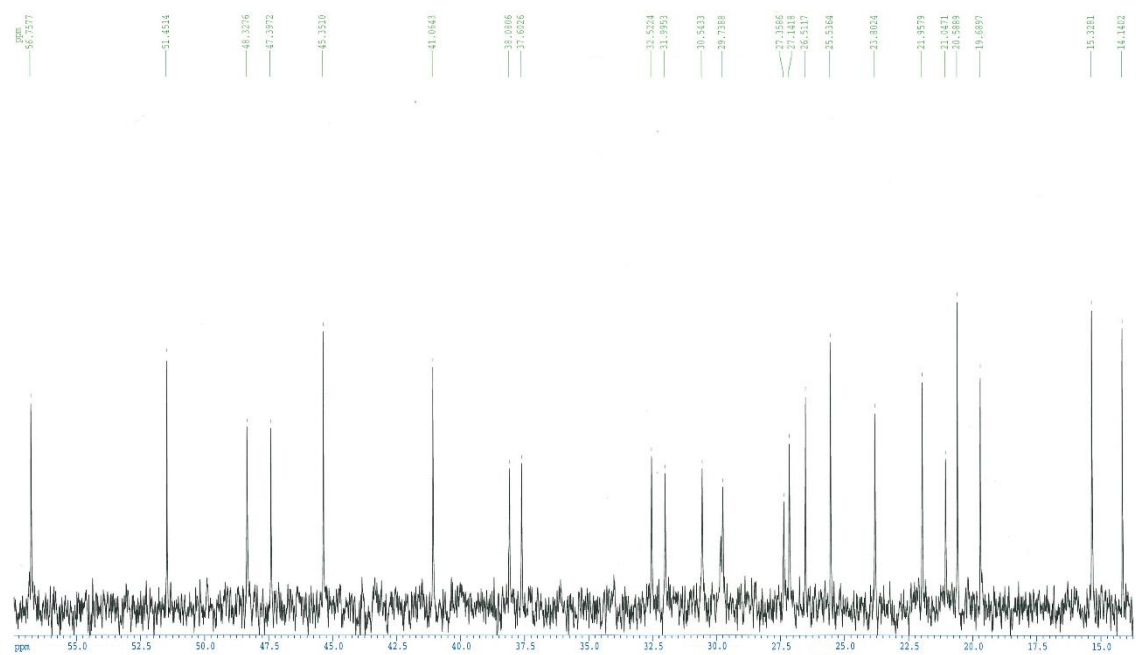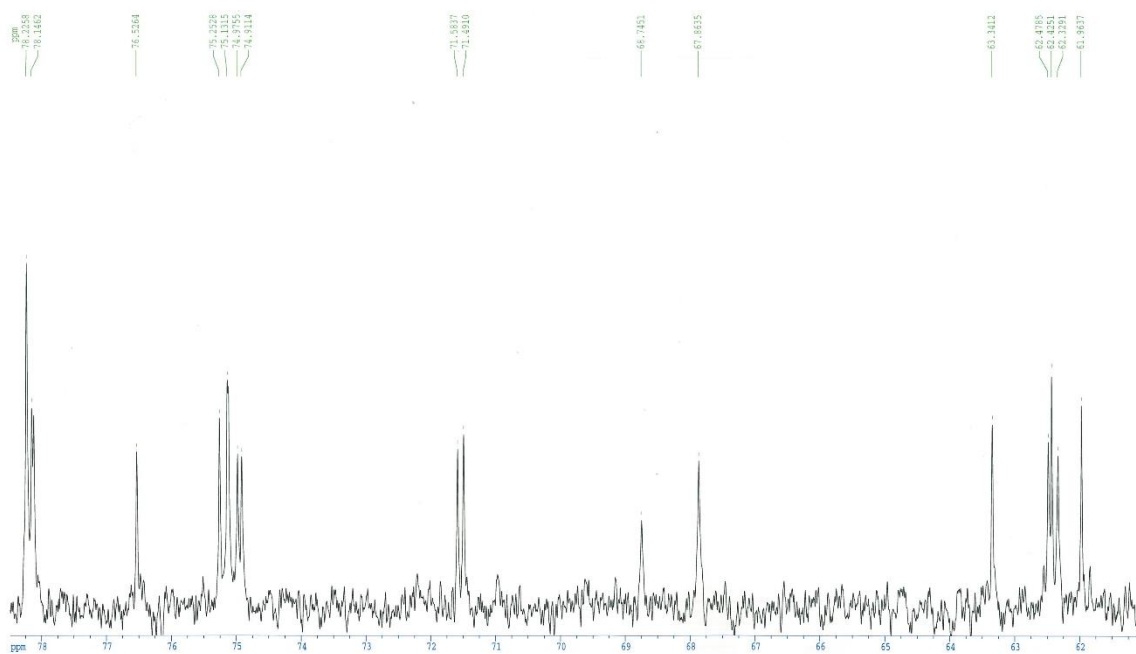

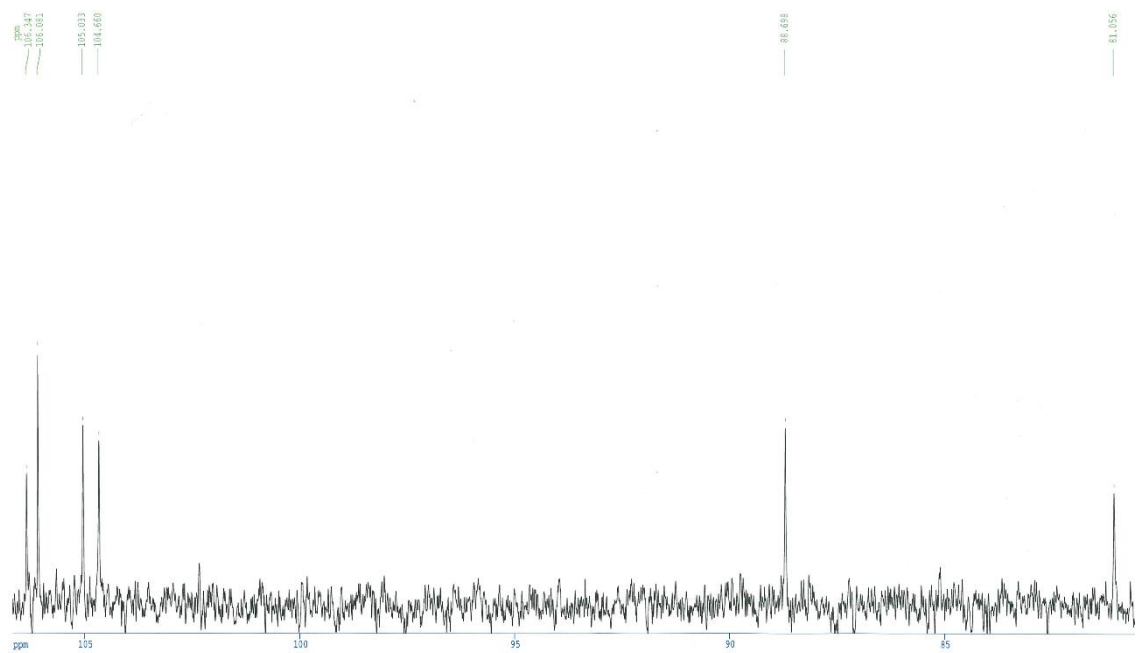

COSY spectrum of **5** in  $\text{C}_5\text{D}_5\text{N}$

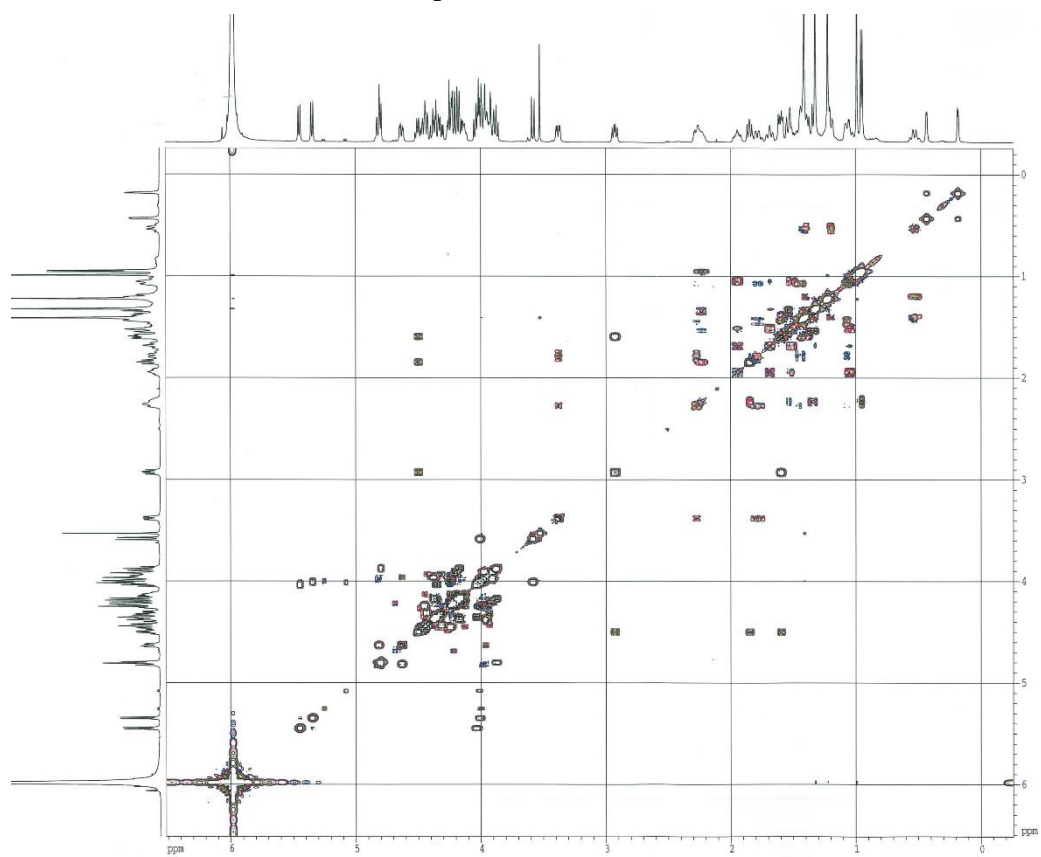

HMQC spectrum of **5** in C<sub>5</sub>D<sub>5</sub>N

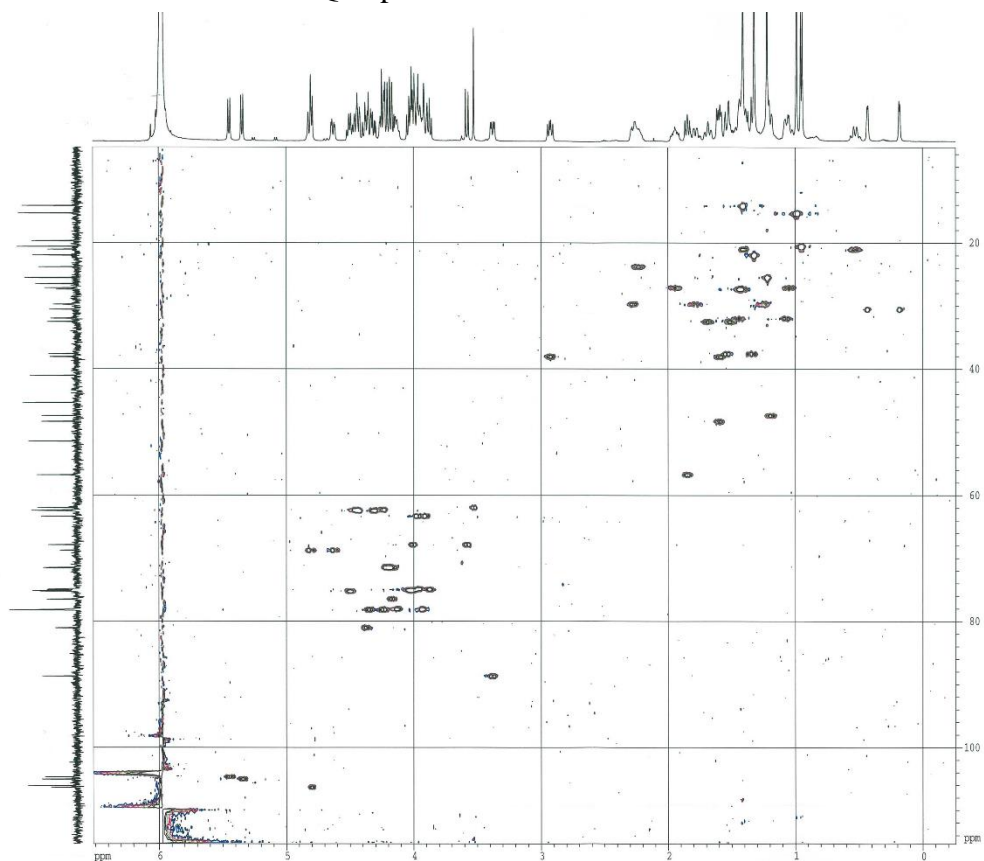

HMBC spectrum of **5** in C<sub>5</sub>D<sub>5</sub>N

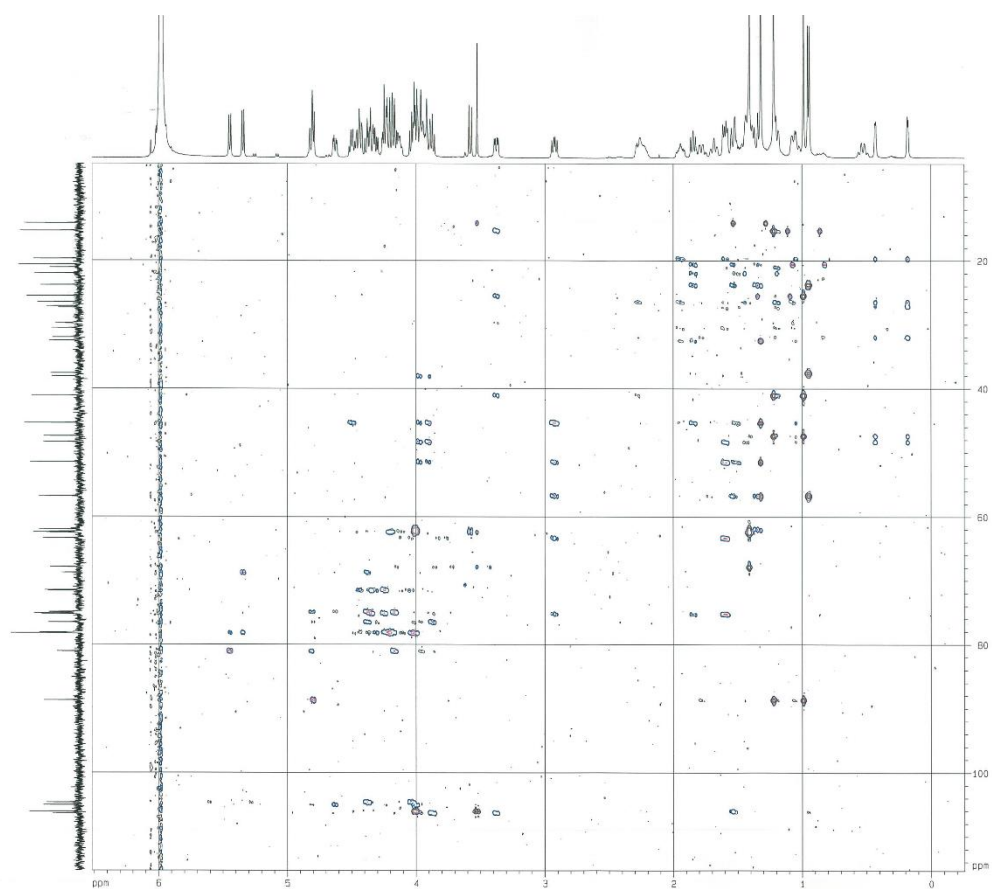

$^1\text{H}$ -NMR spectrum of **6** in  $\text{C}_5\text{D}_5\text{N}$

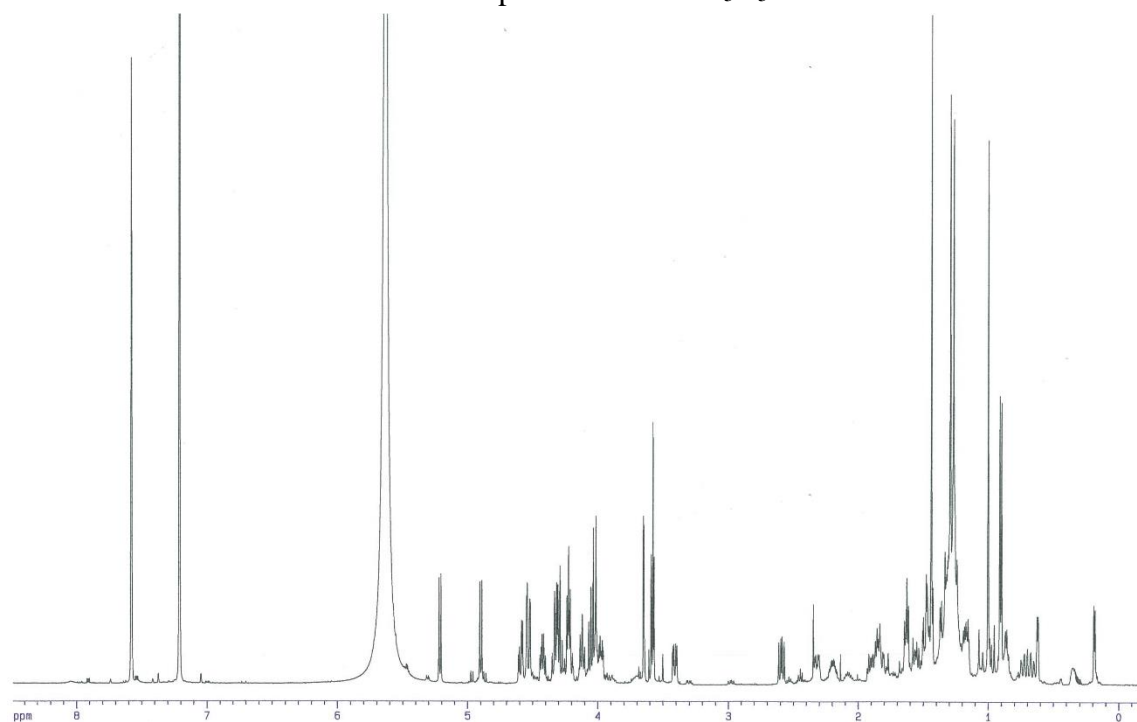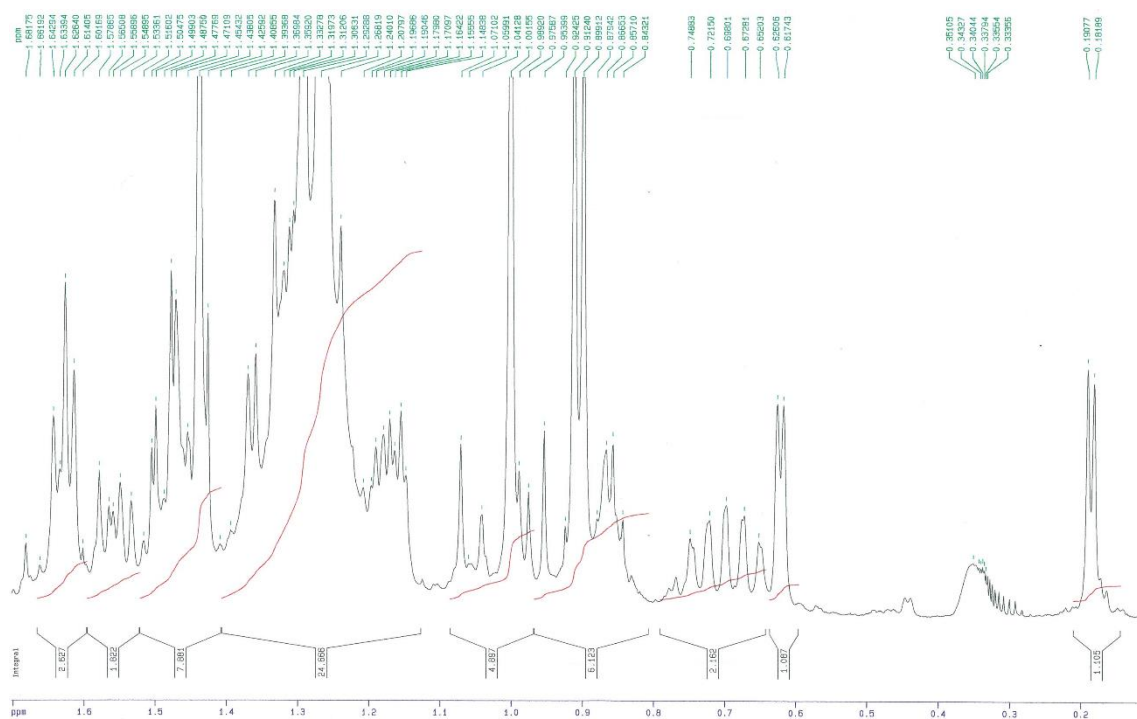

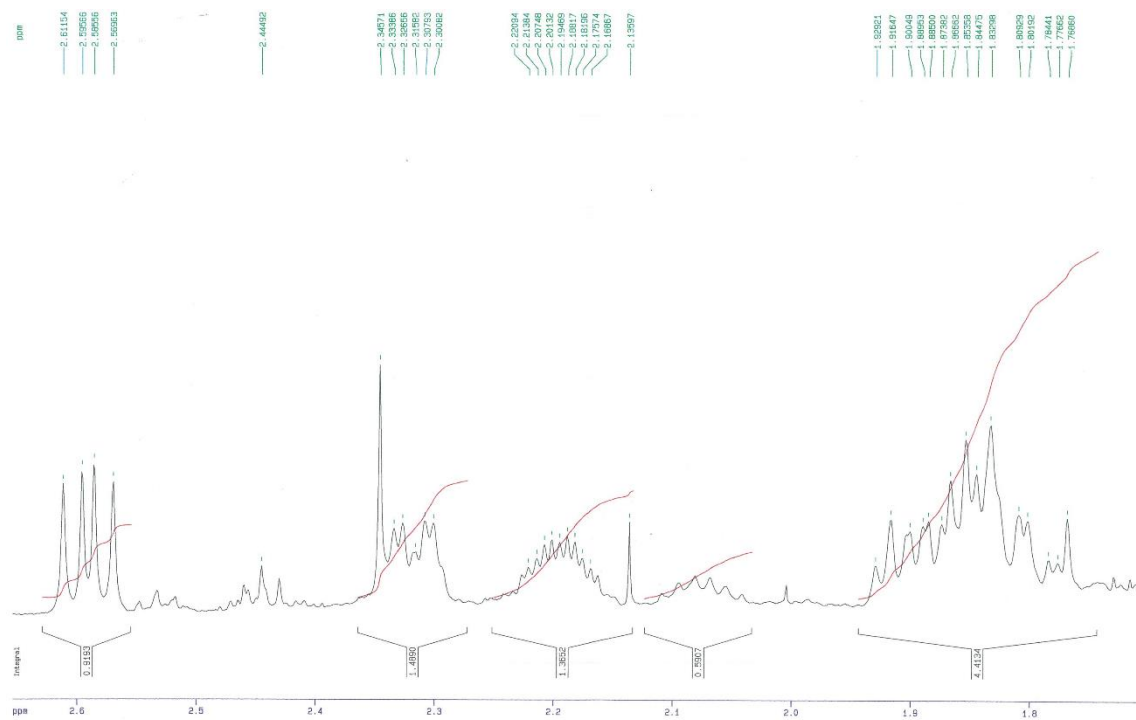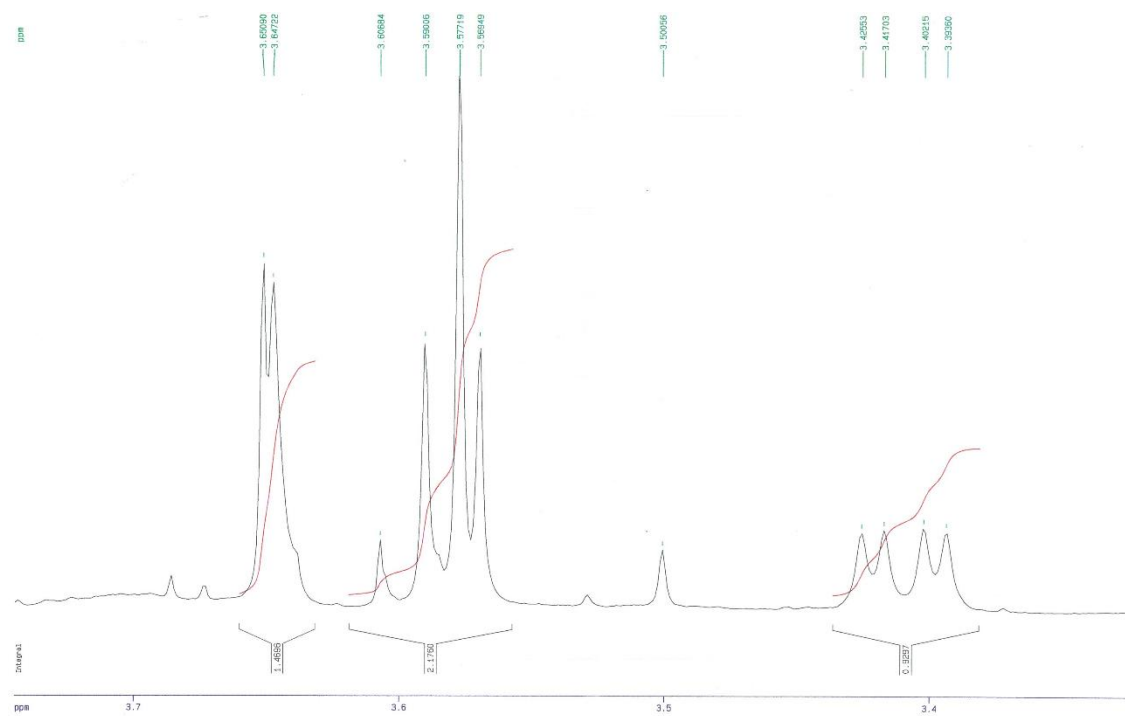

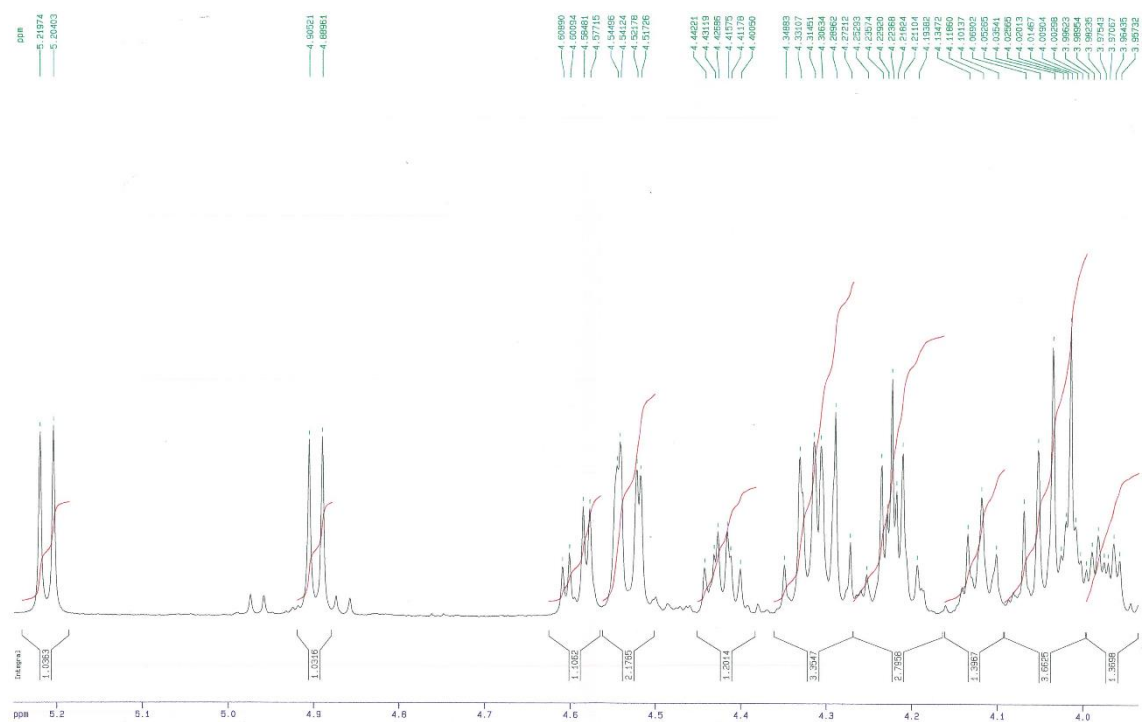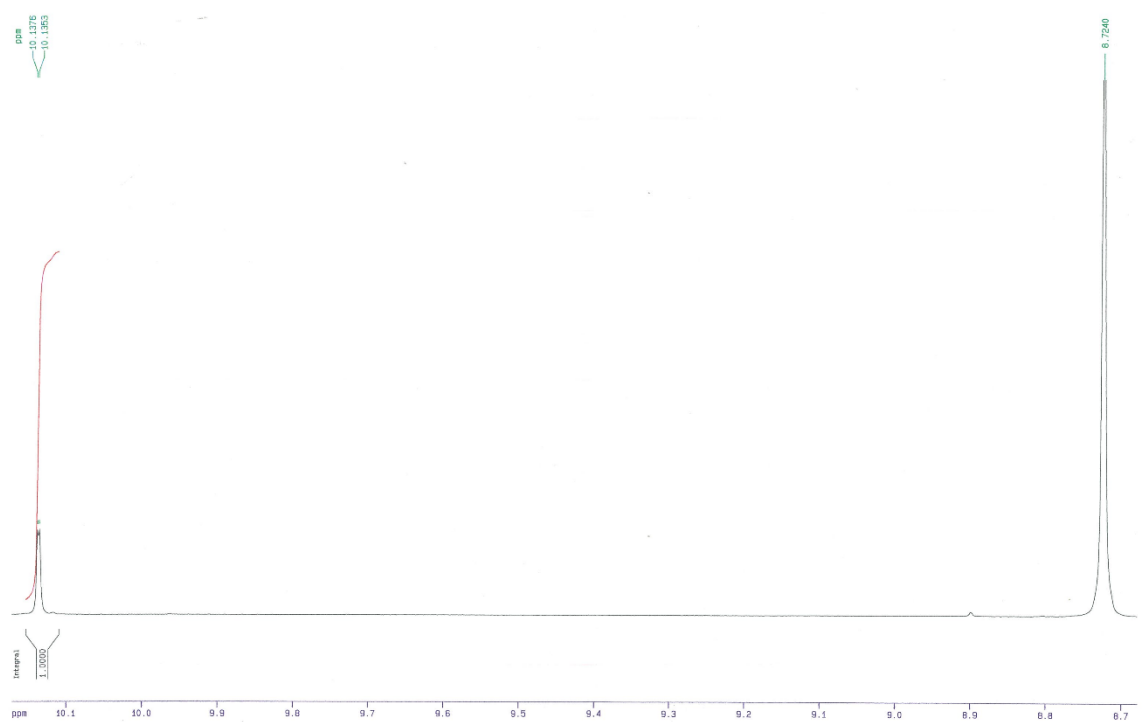

$^{13}\text{C}$ -NMR spectrum of **6** in  $\text{C}_5\text{D}_5\text{N}$

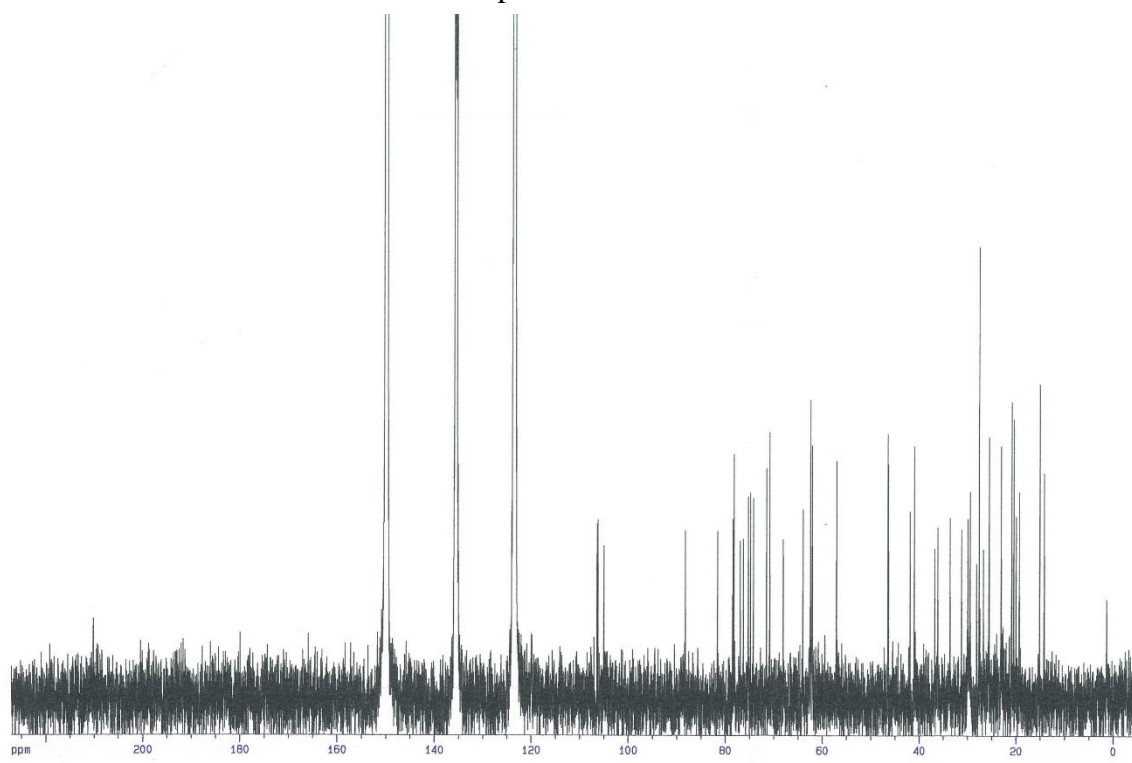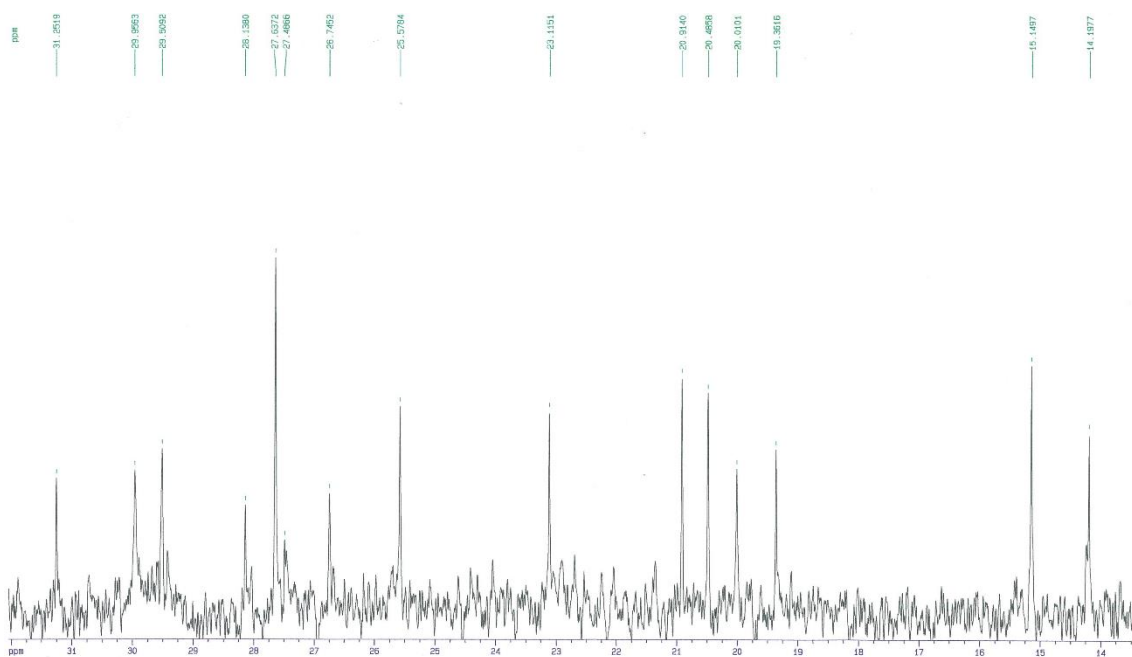



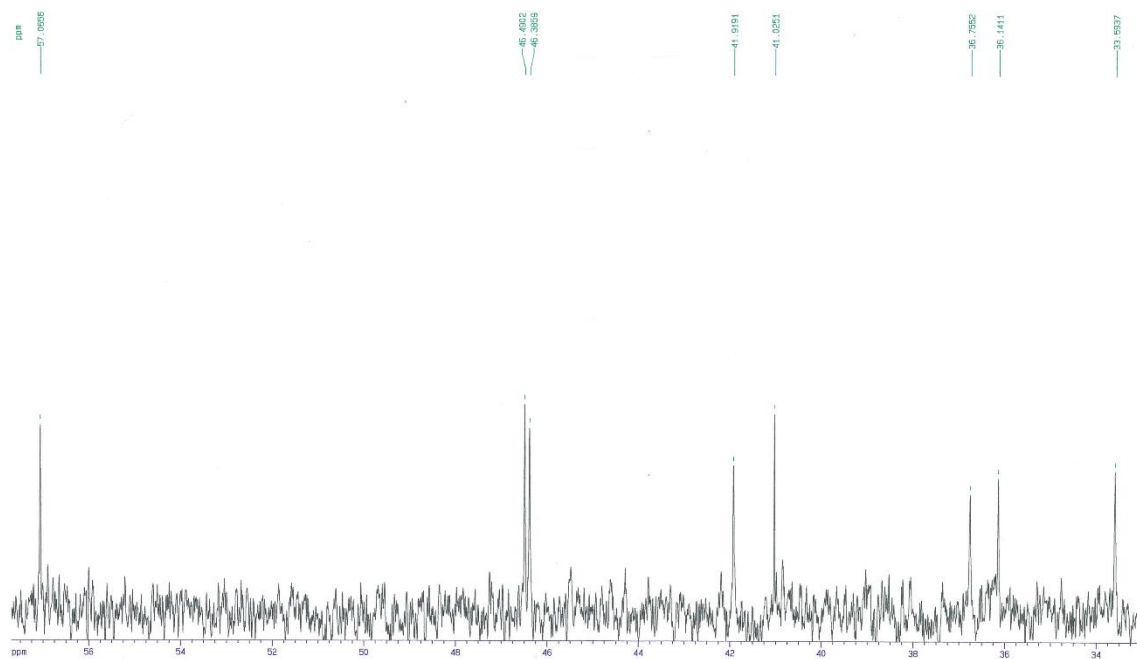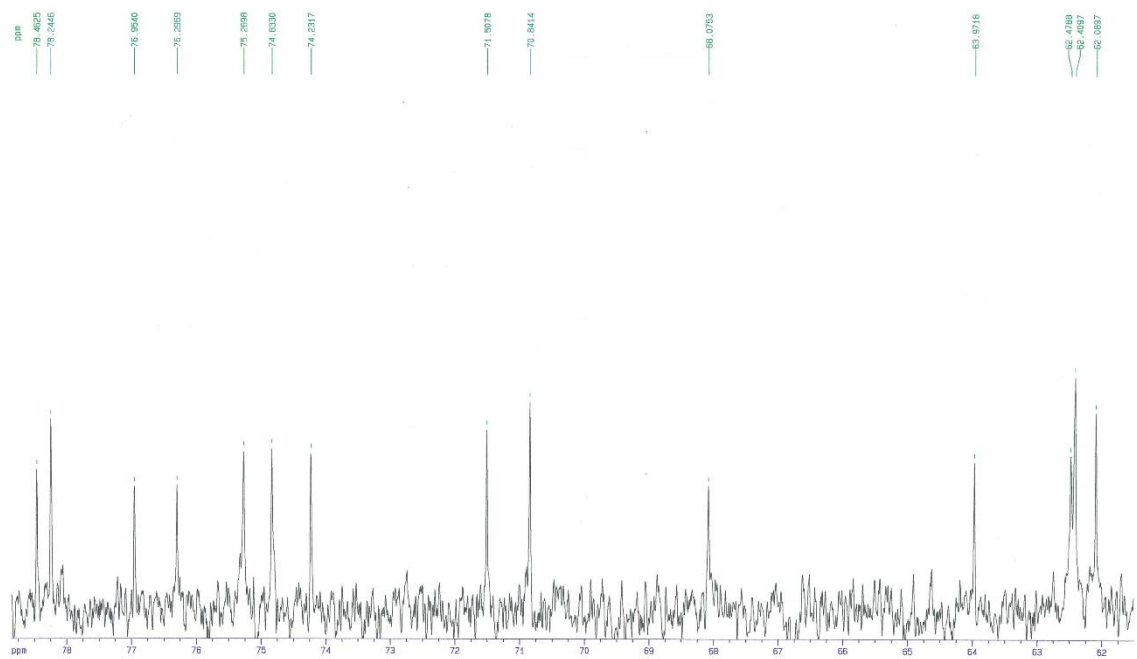

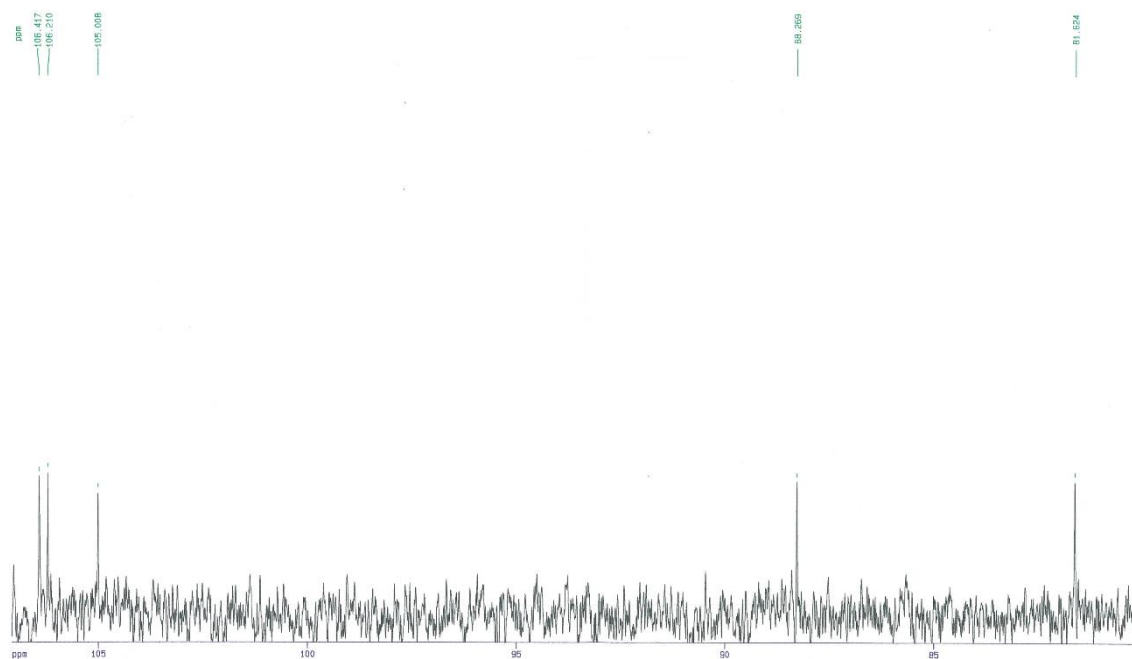

COSY spectrum of **6** in  $\text{C}_5\text{D}_5\text{N}$

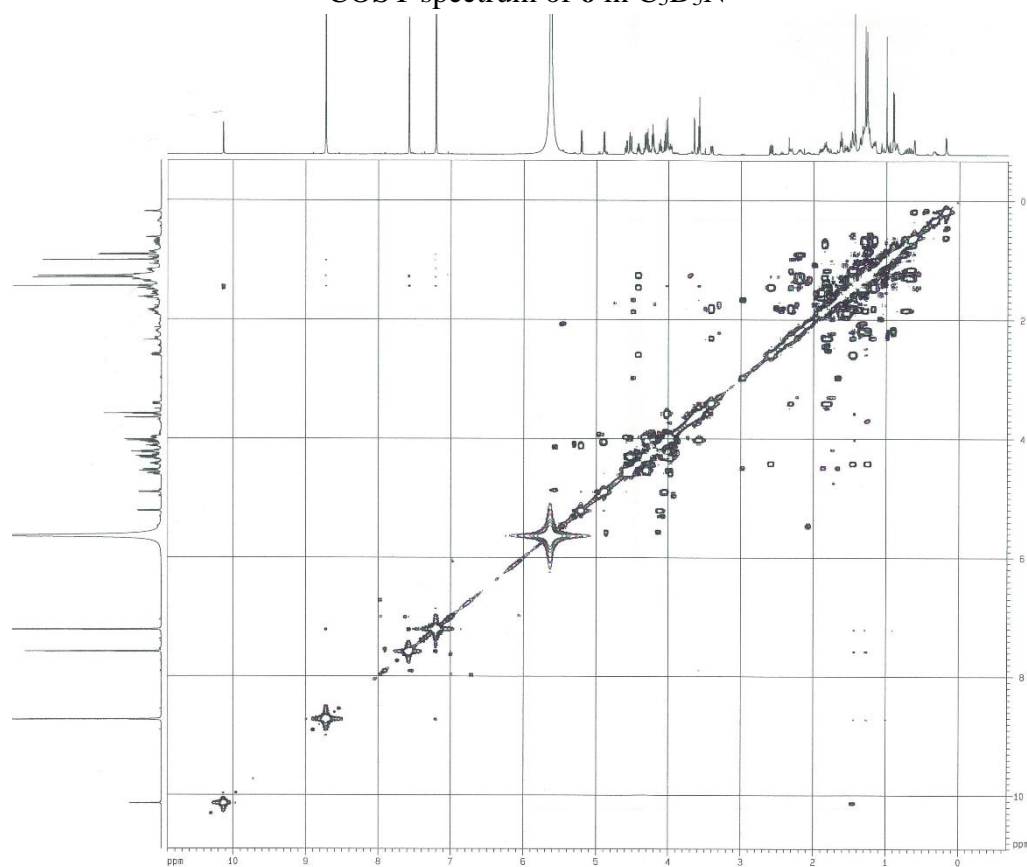

HMQC spectrum of **6** in C<sub>5</sub>D<sub>5</sub>N

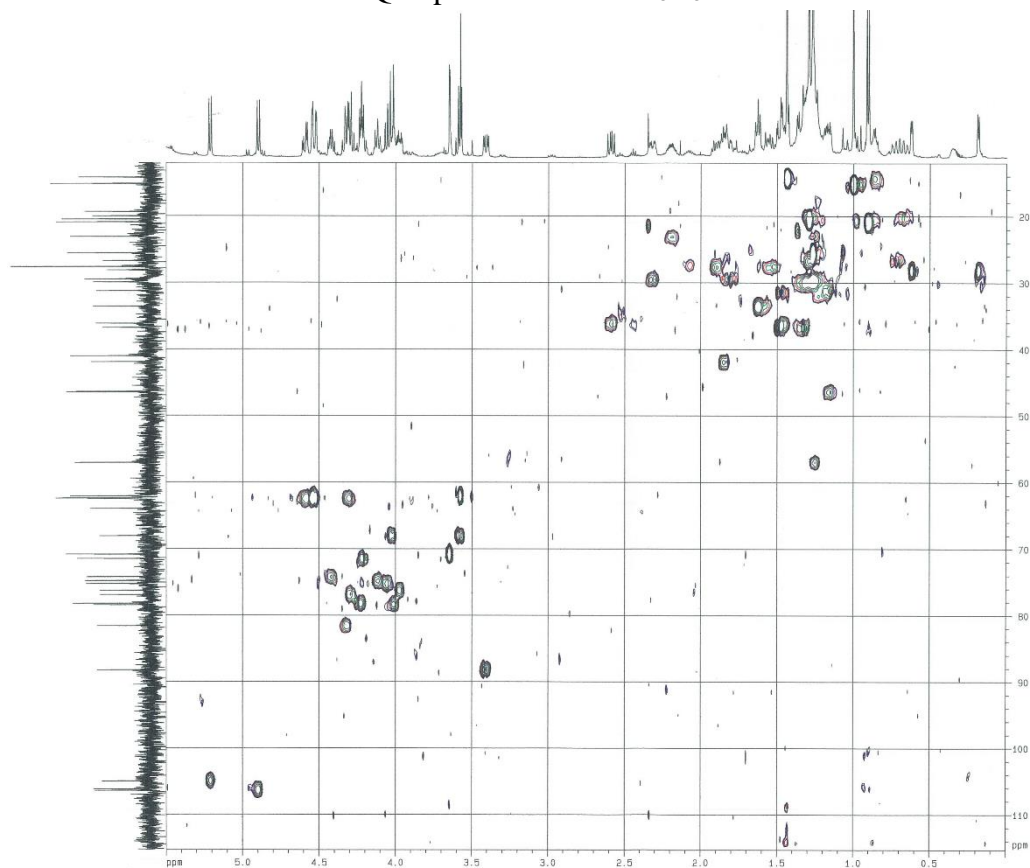

HMBC spectrum of **6** in C<sub>5</sub>D<sub>5</sub>N

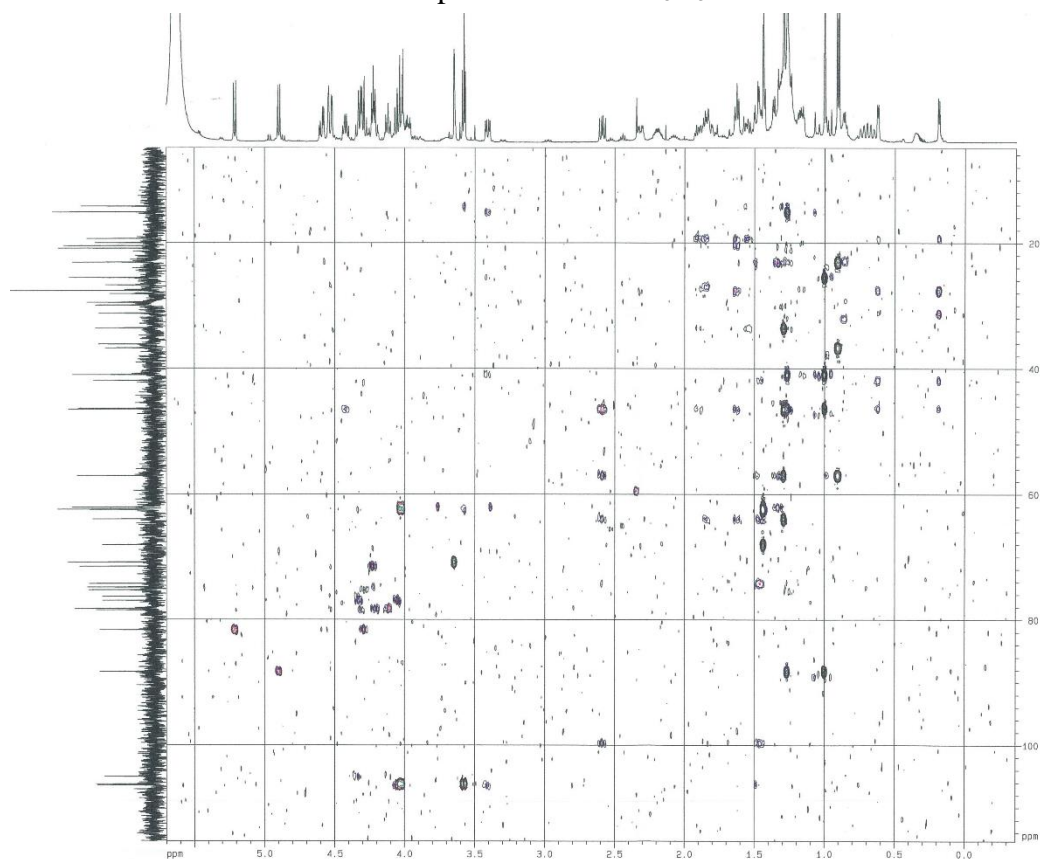

$^1\text{H}$ -NMR spectrum of **7** in  $\text{C}_5\text{D}_5\text{N}$

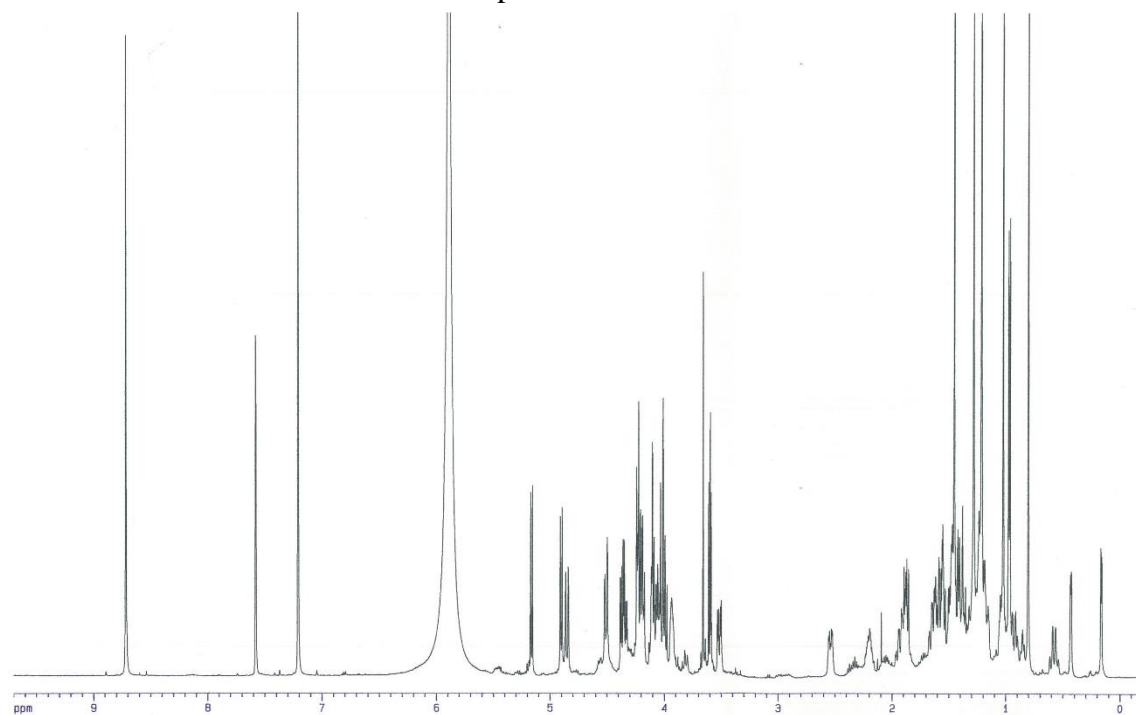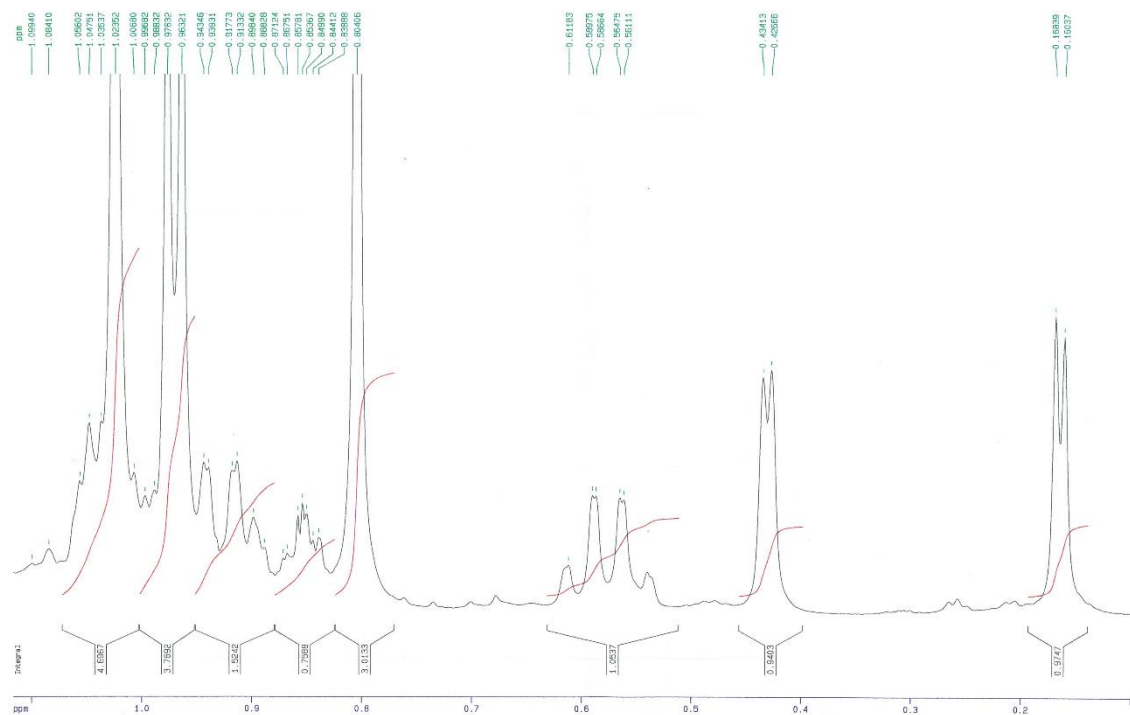

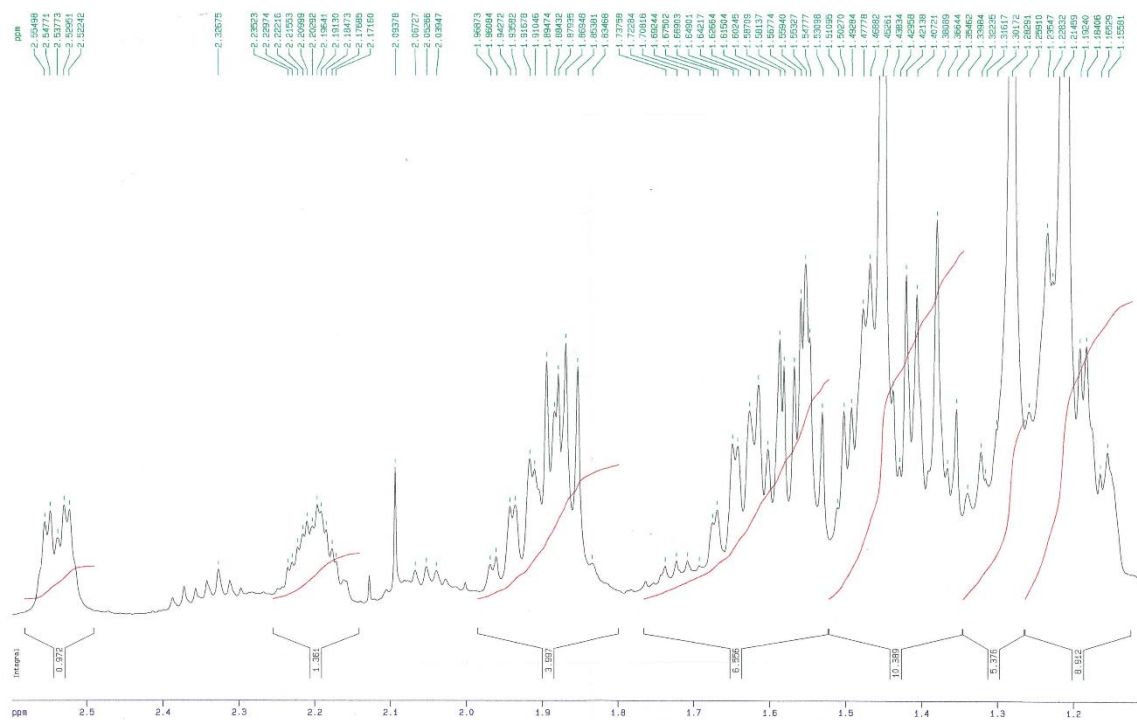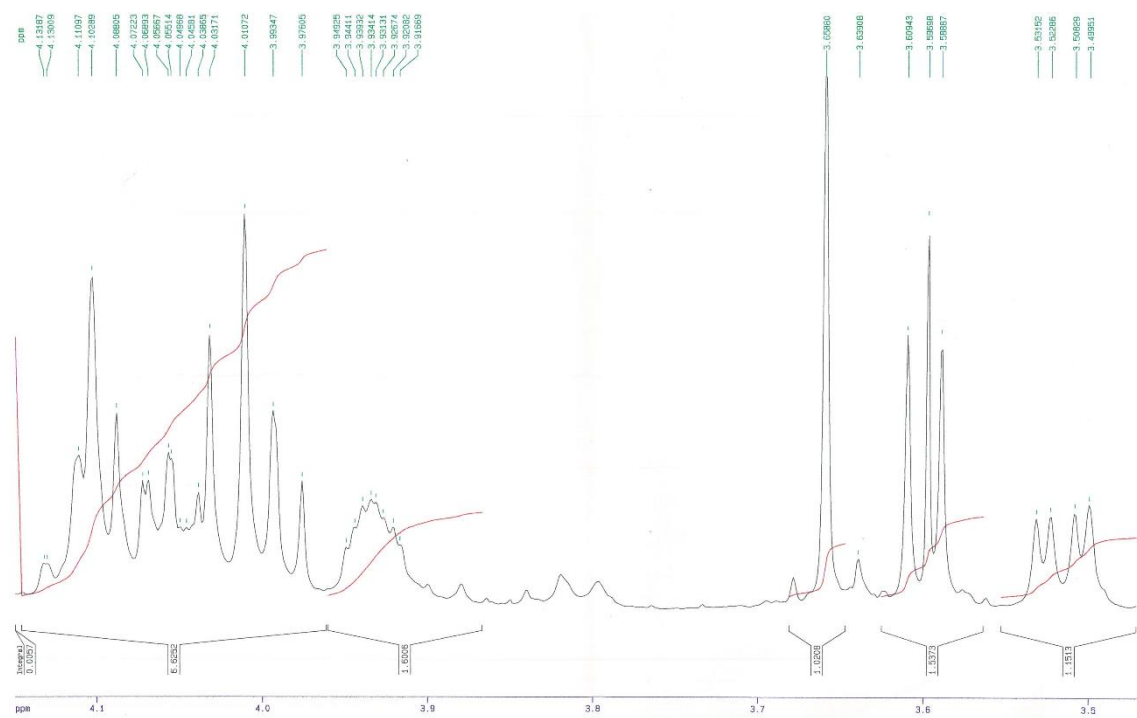

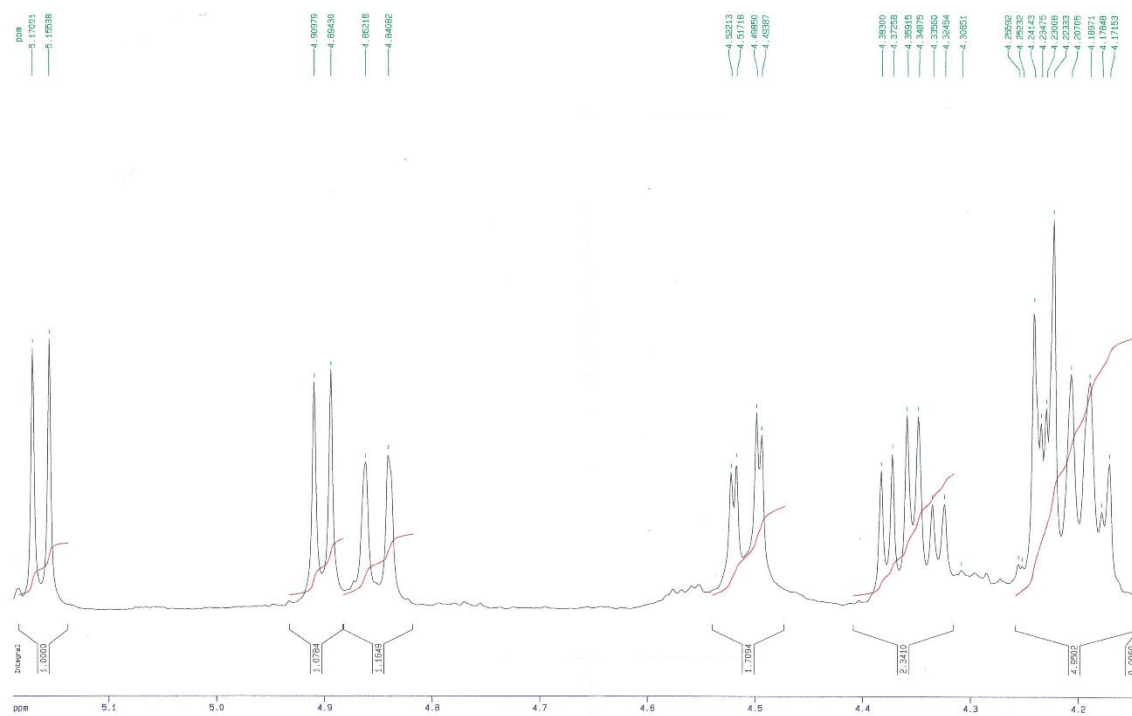

<sup>13</sup>C-NMR spectrum of **7** in C<sub>5</sub>D<sub>5</sub>N

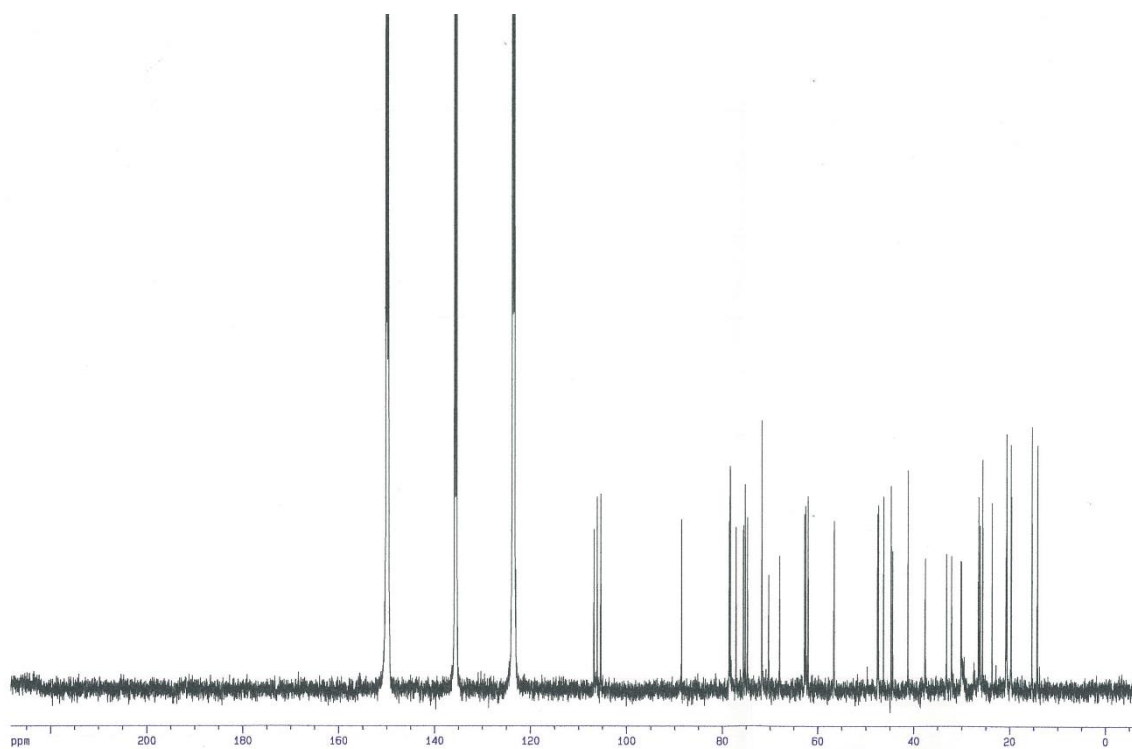

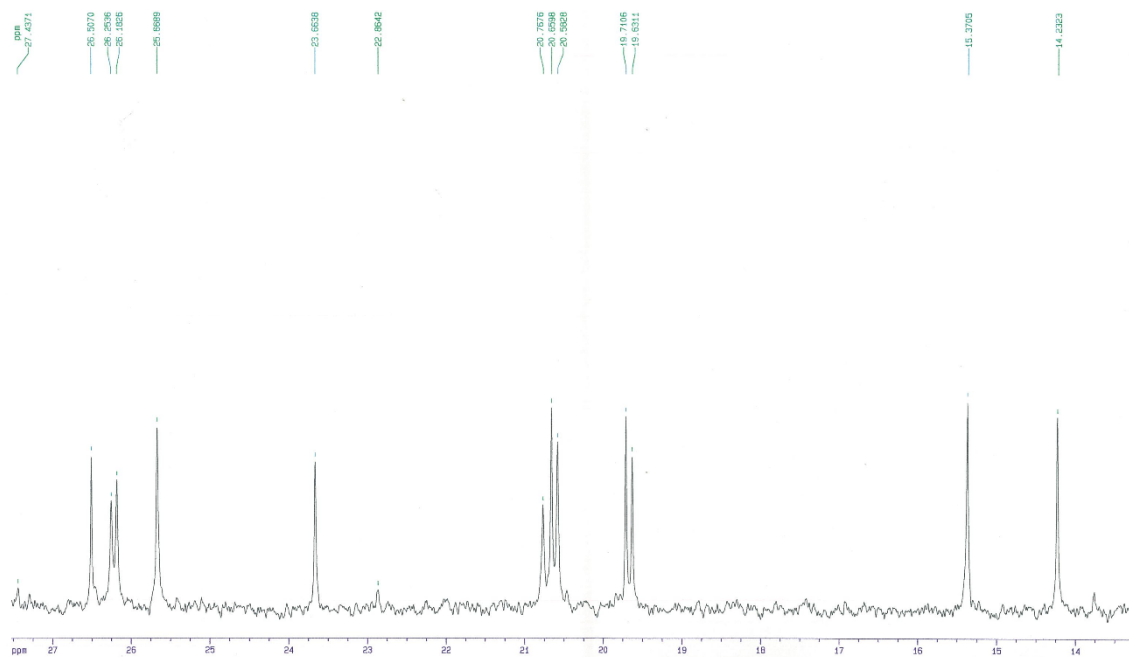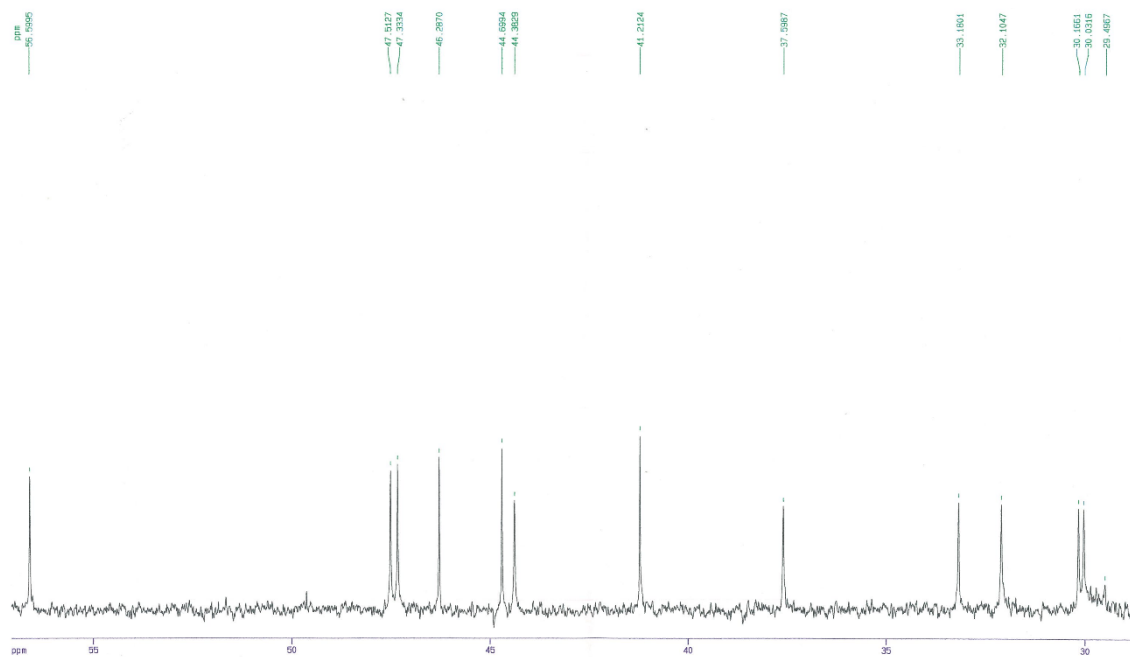



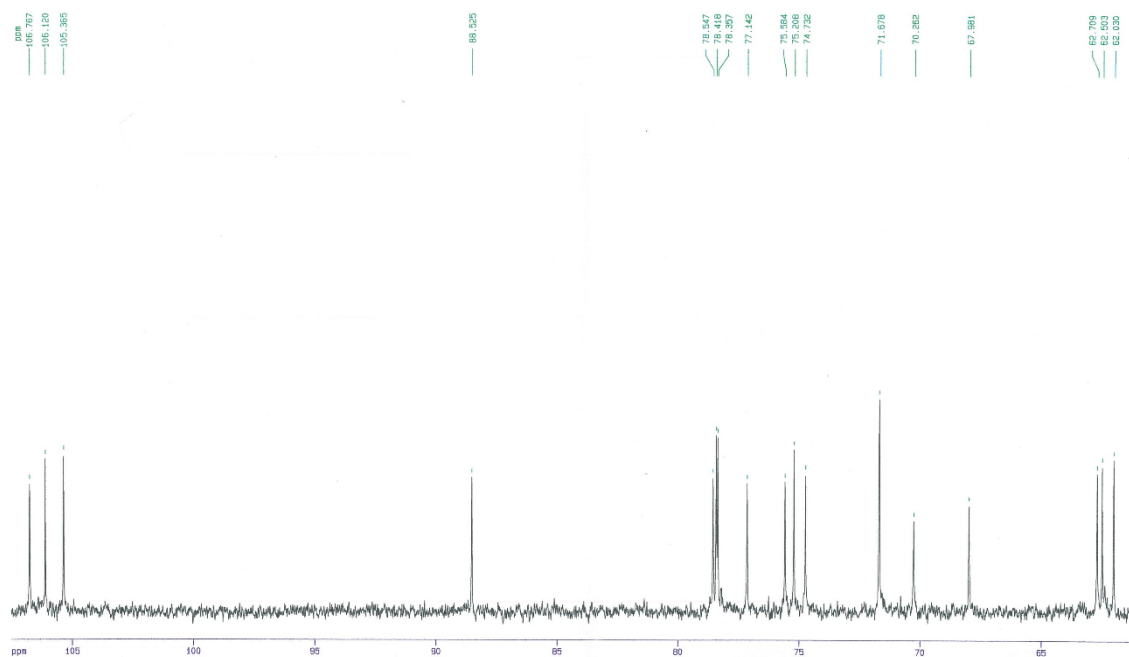

COSY spectrum of **7** in C<sub>5</sub>D<sub>5</sub>N

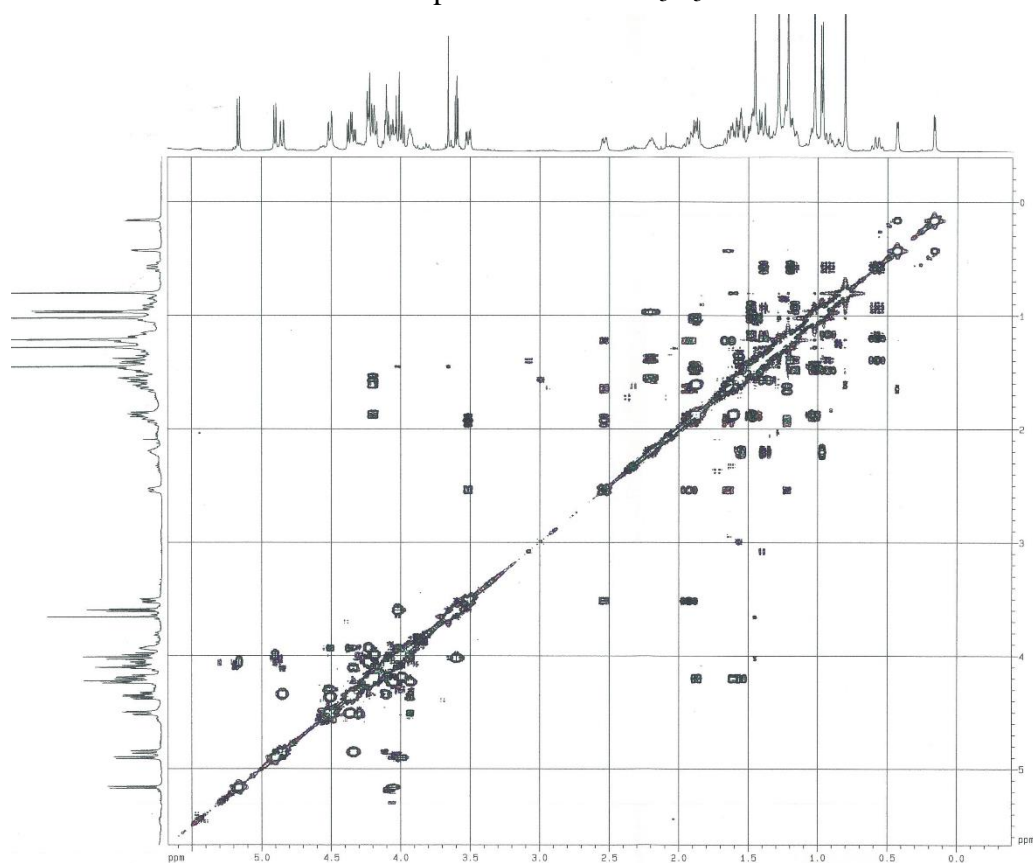

HMQC spectrum of **7** in C<sub>5</sub>D<sub>5</sub>N

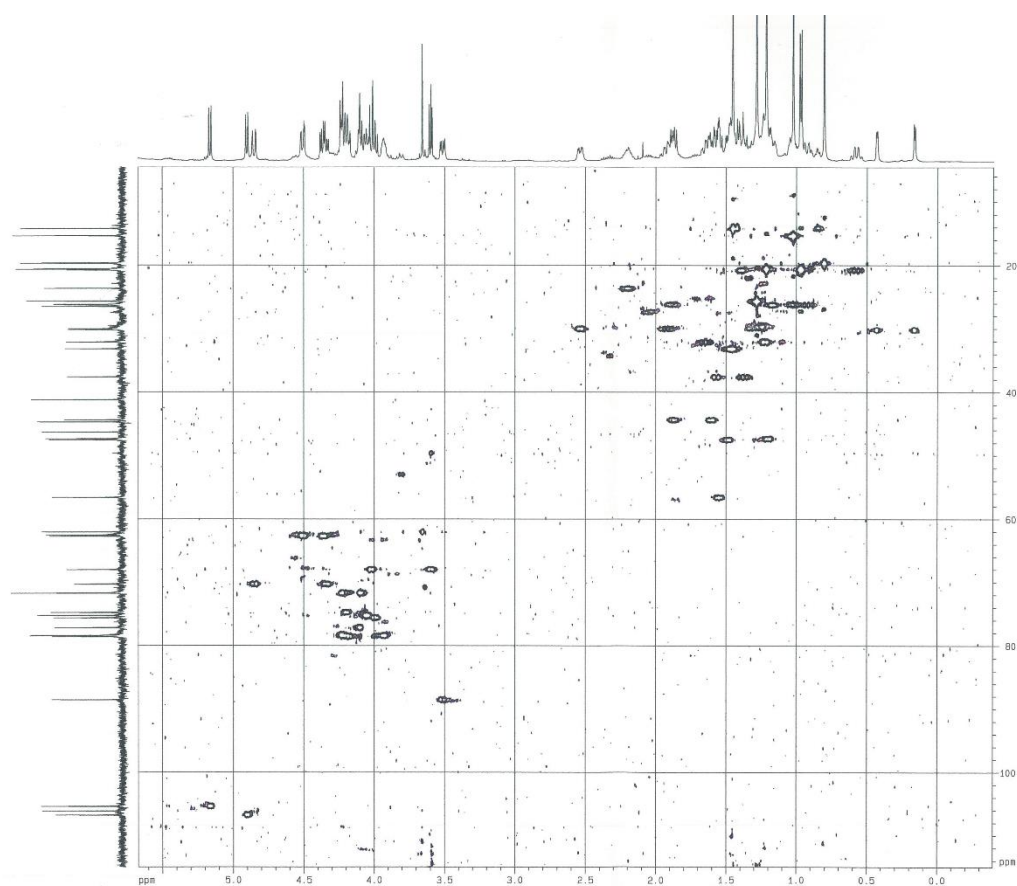

HMBC spectrum of **7** in C<sub>5</sub>D<sub>5</sub>N

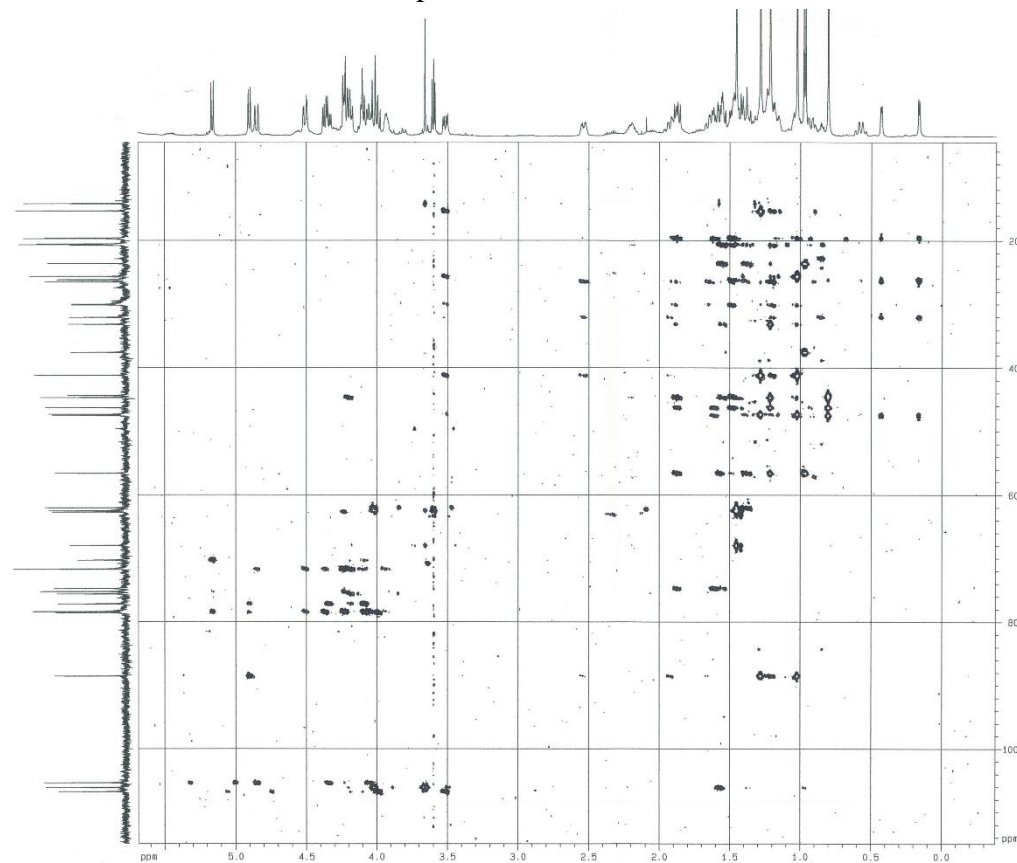

NOESY spectrum of **7** in C<sub>5</sub>D<sub>5</sub>N

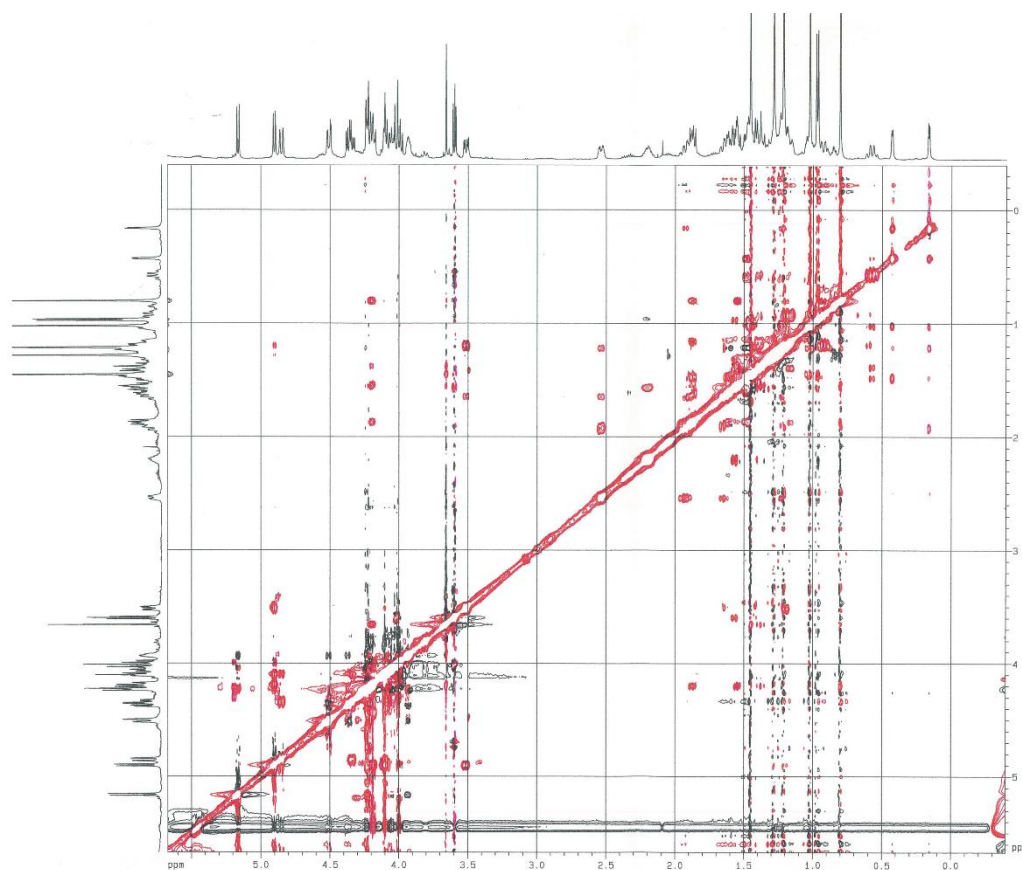

<sup>1</sup>H-NMR spectrum of **8** in C<sub>5</sub>D<sub>5</sub>N

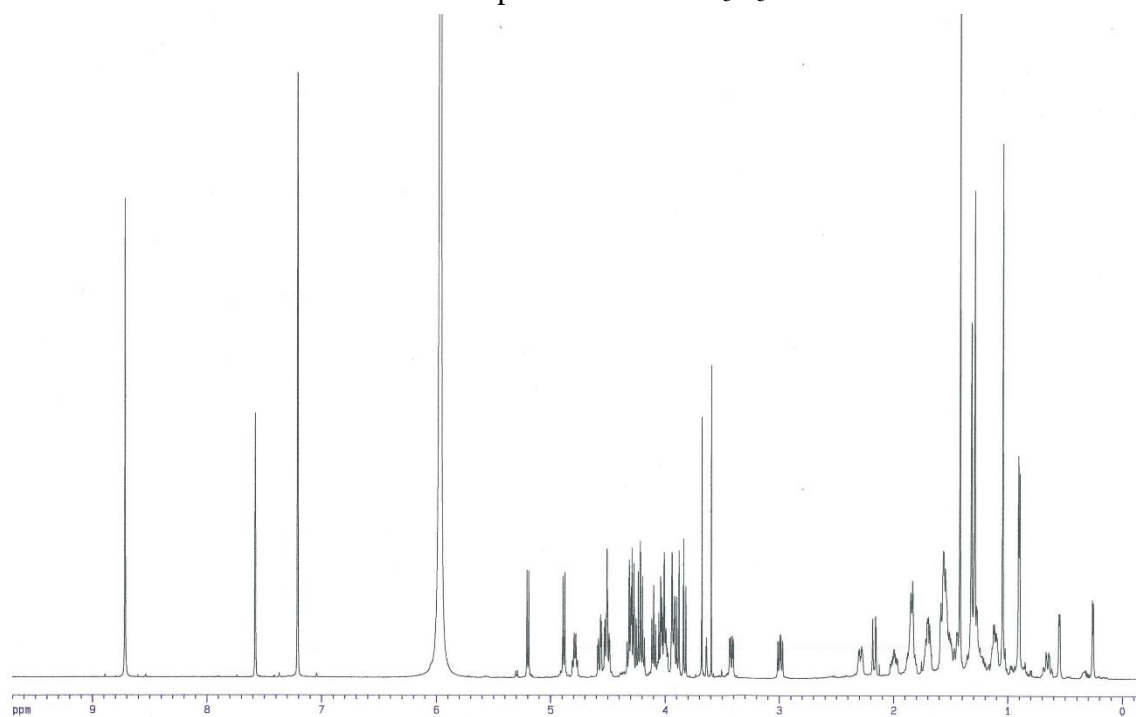

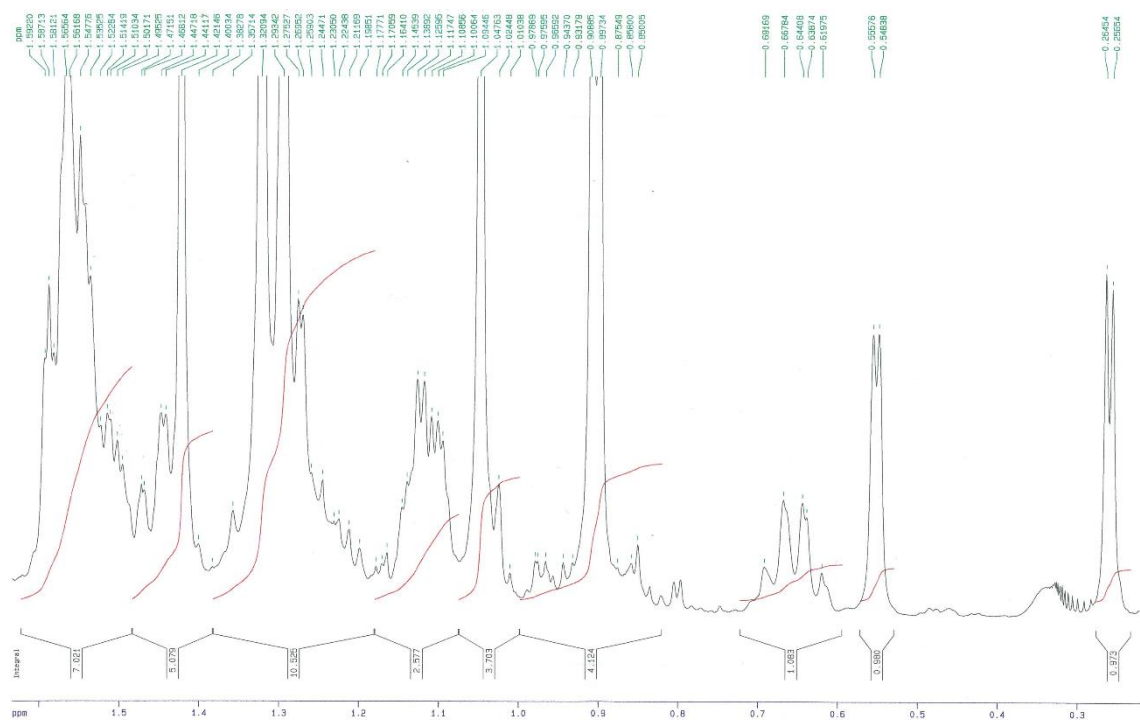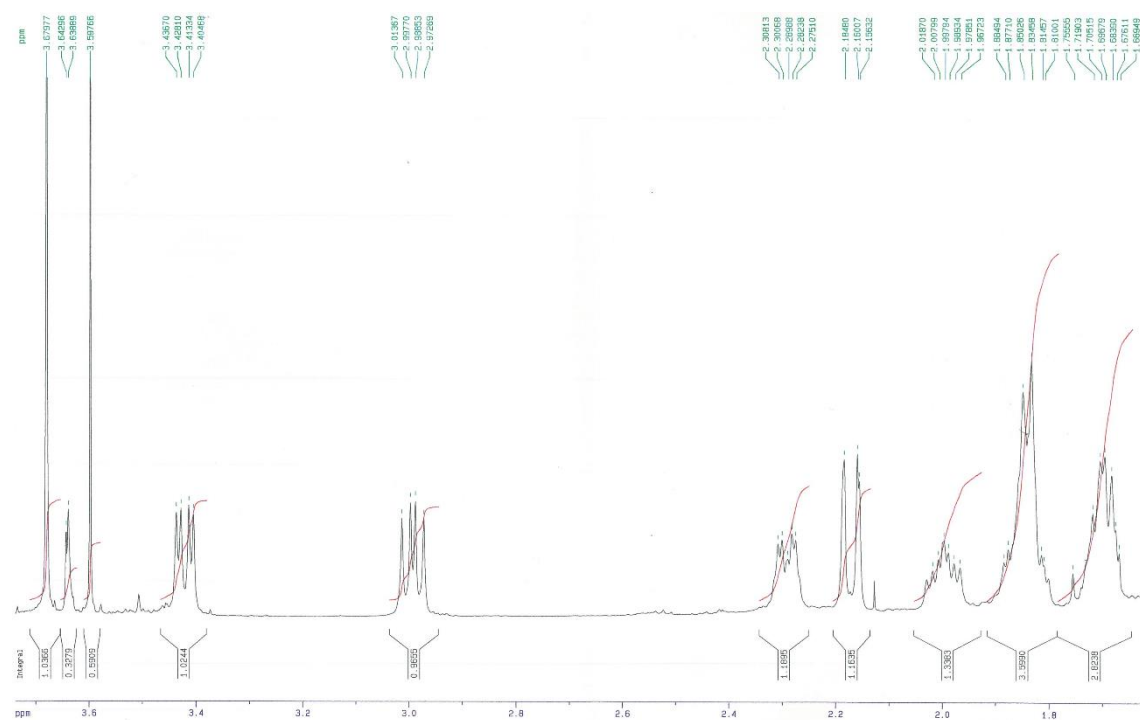

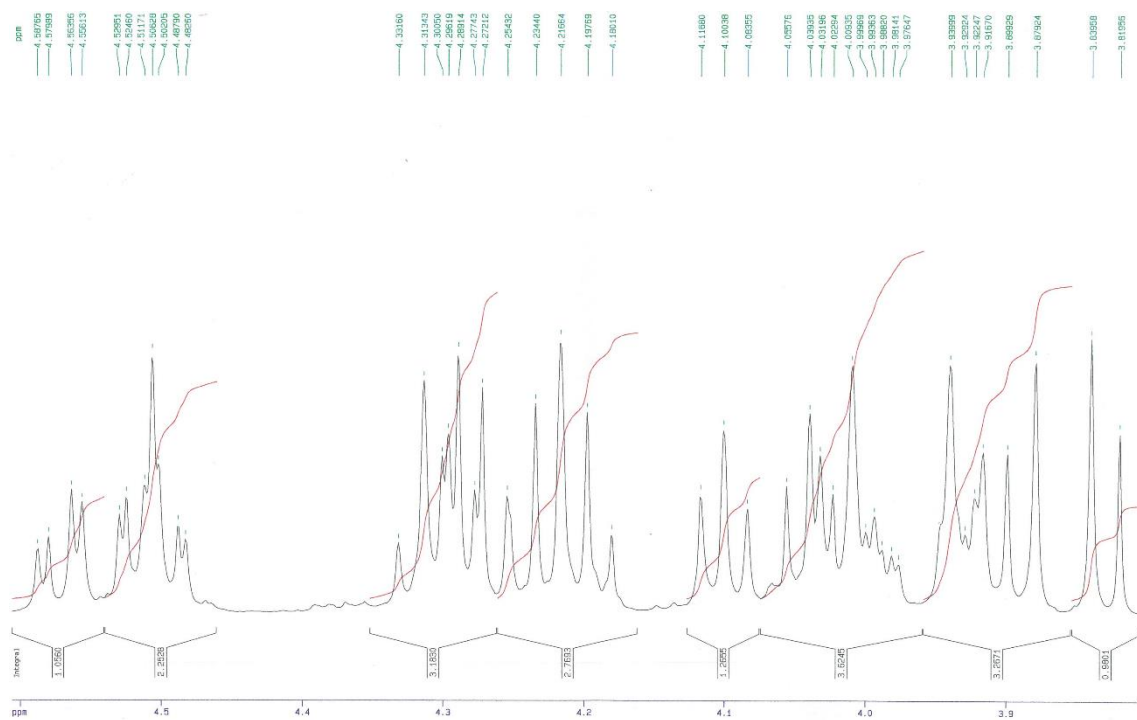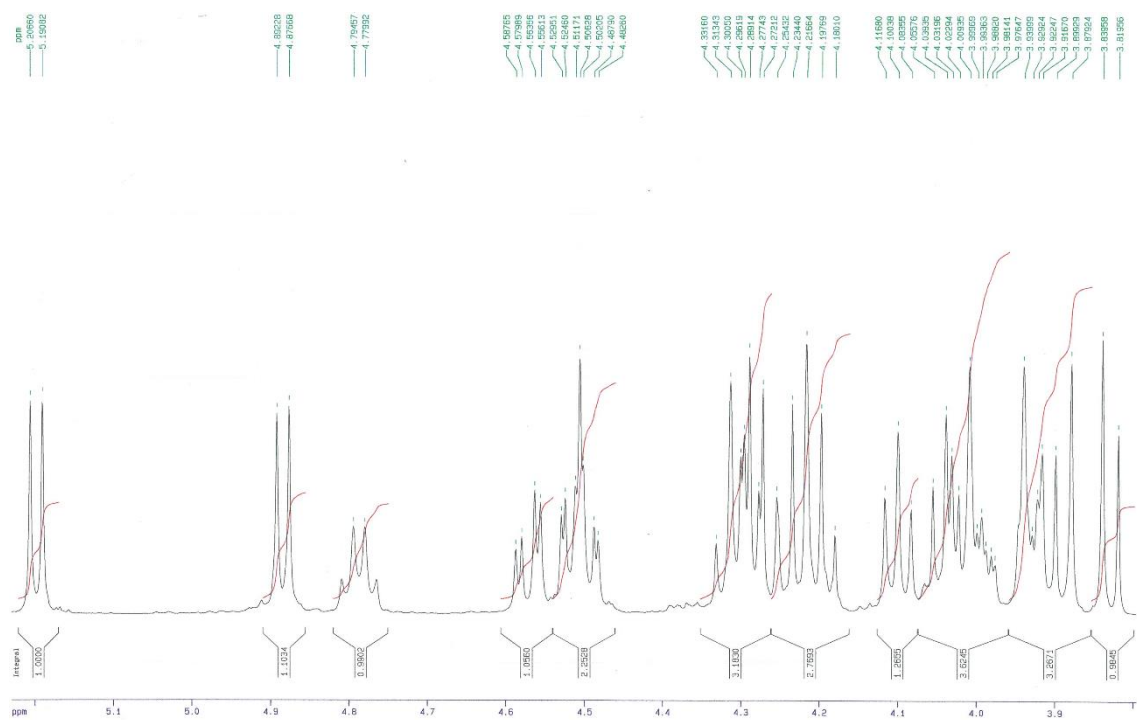

$^{13}\text{C}$ -NMR spectrum of **8** in  $\text{C}_5\text{D}_5\text{N}$

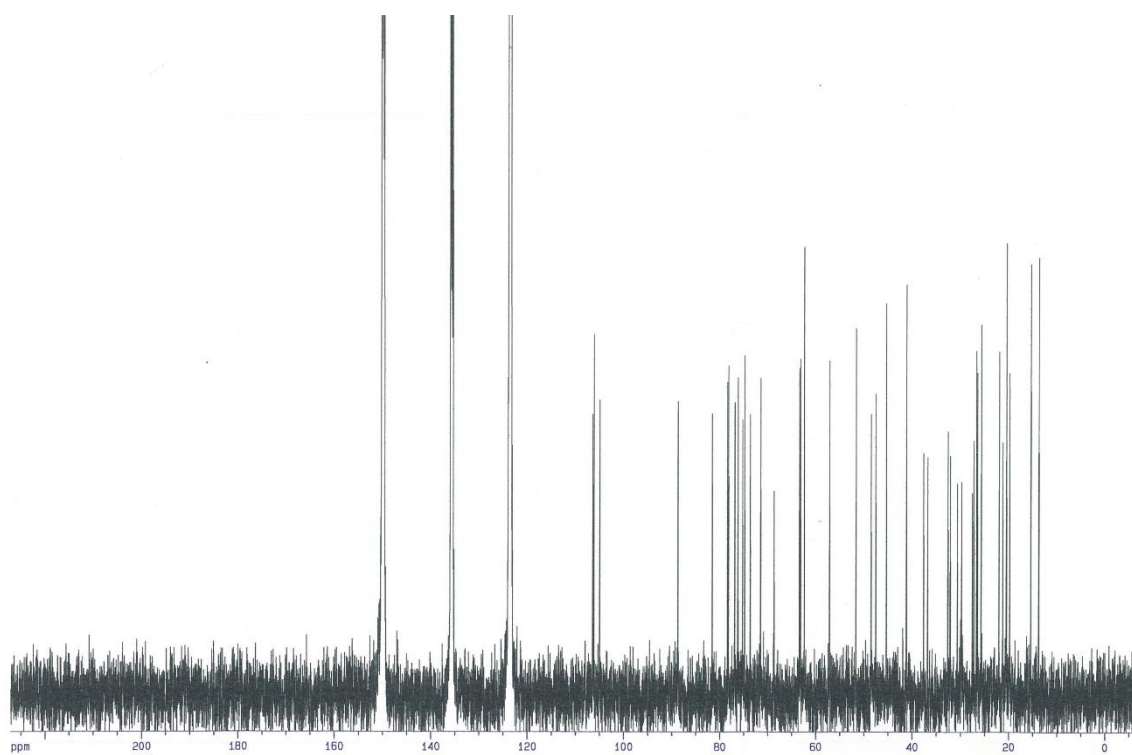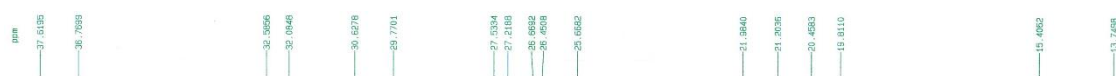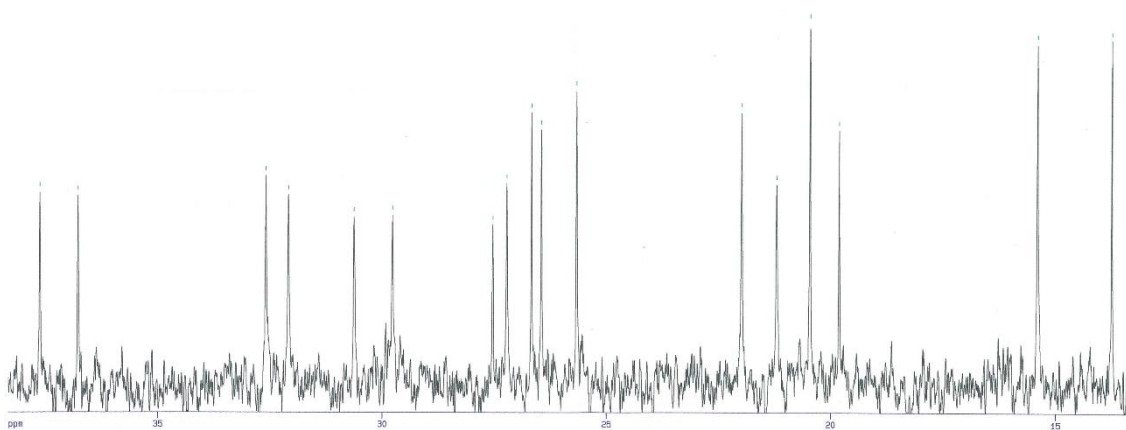

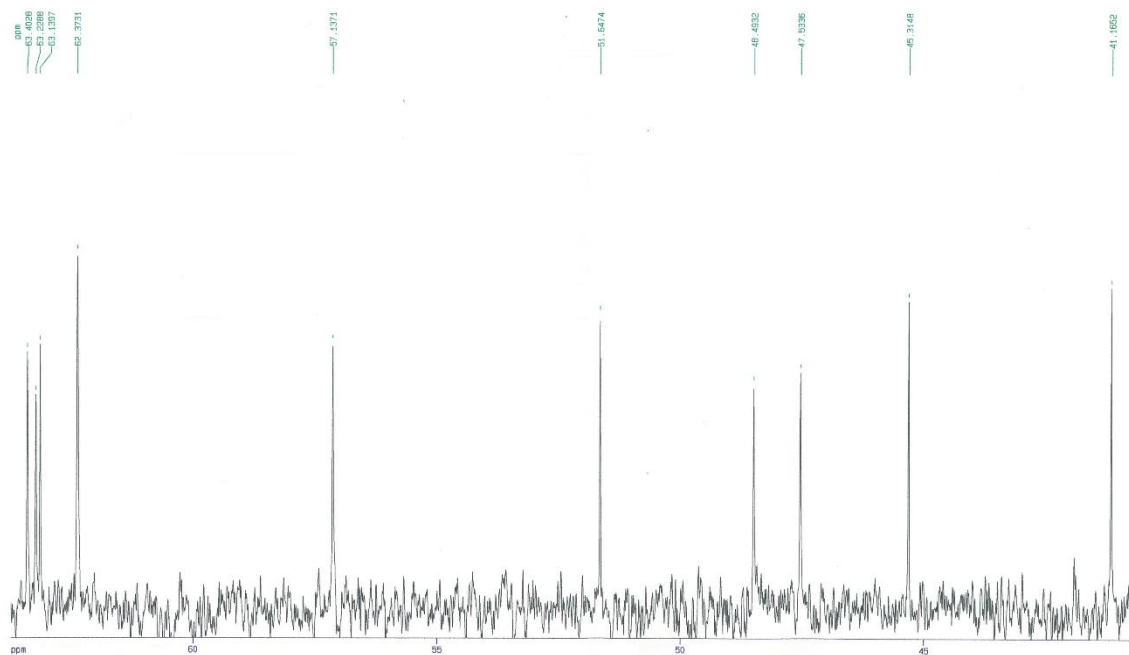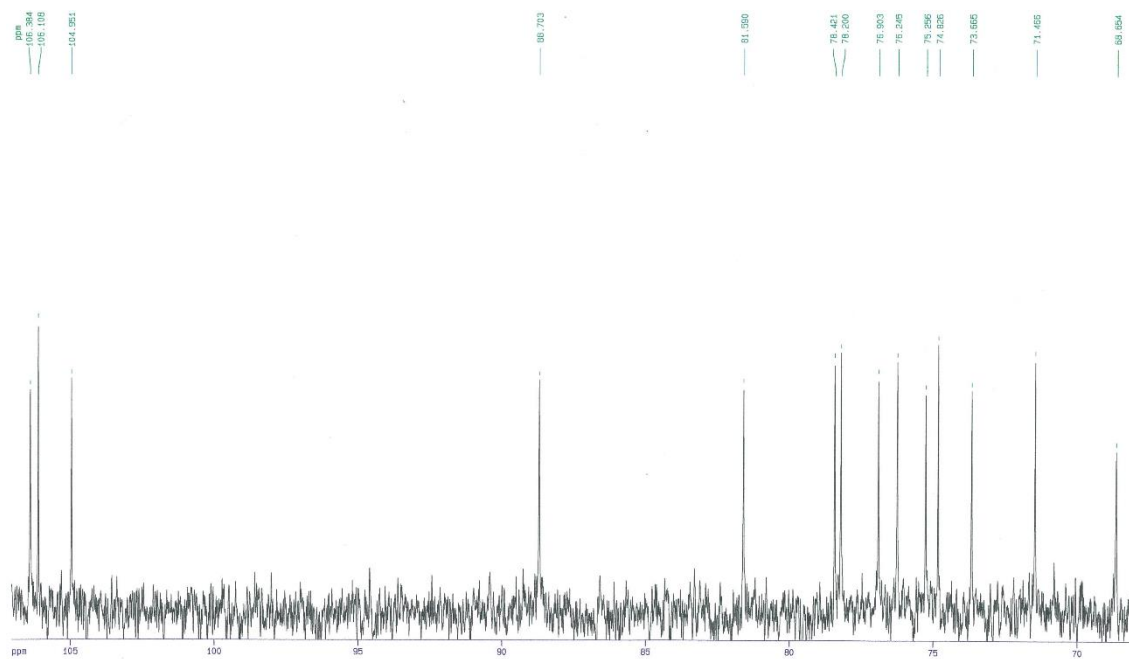



COSY spectrum of **8** in C<sub>5</sub>D<sub>5</sub>N

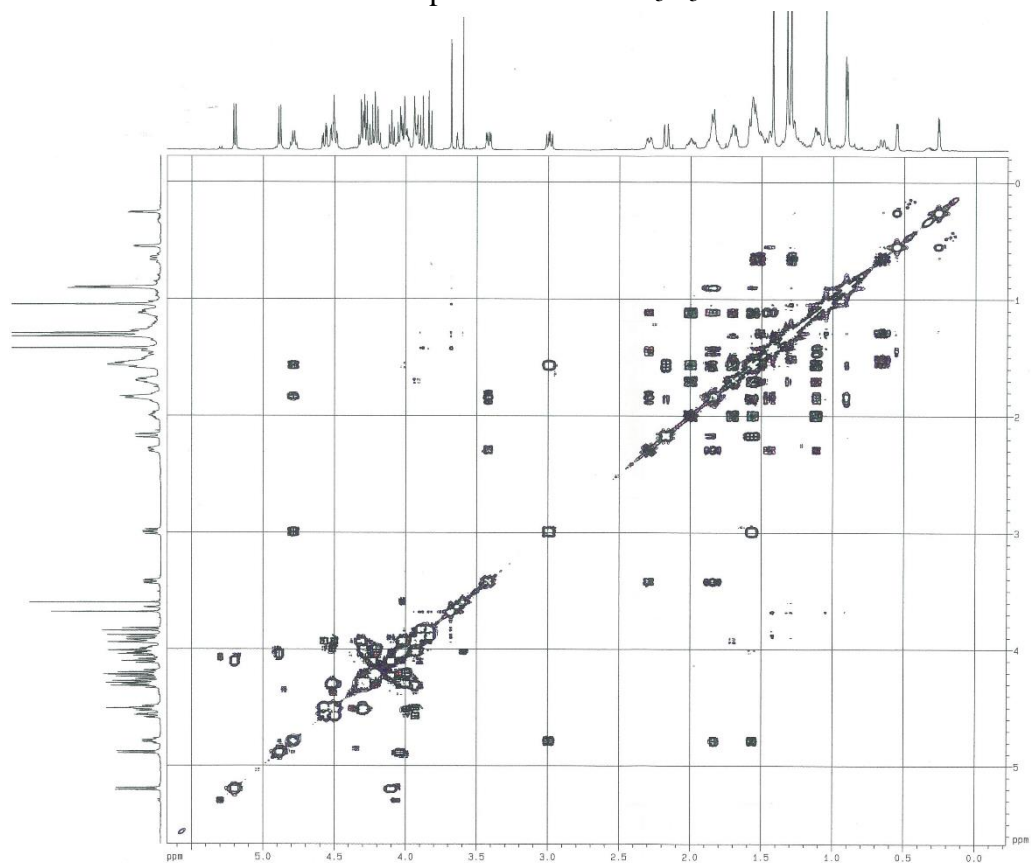

HMQC spectrum of **8** in C<sub>5</sub>D<sub>5</sub>N

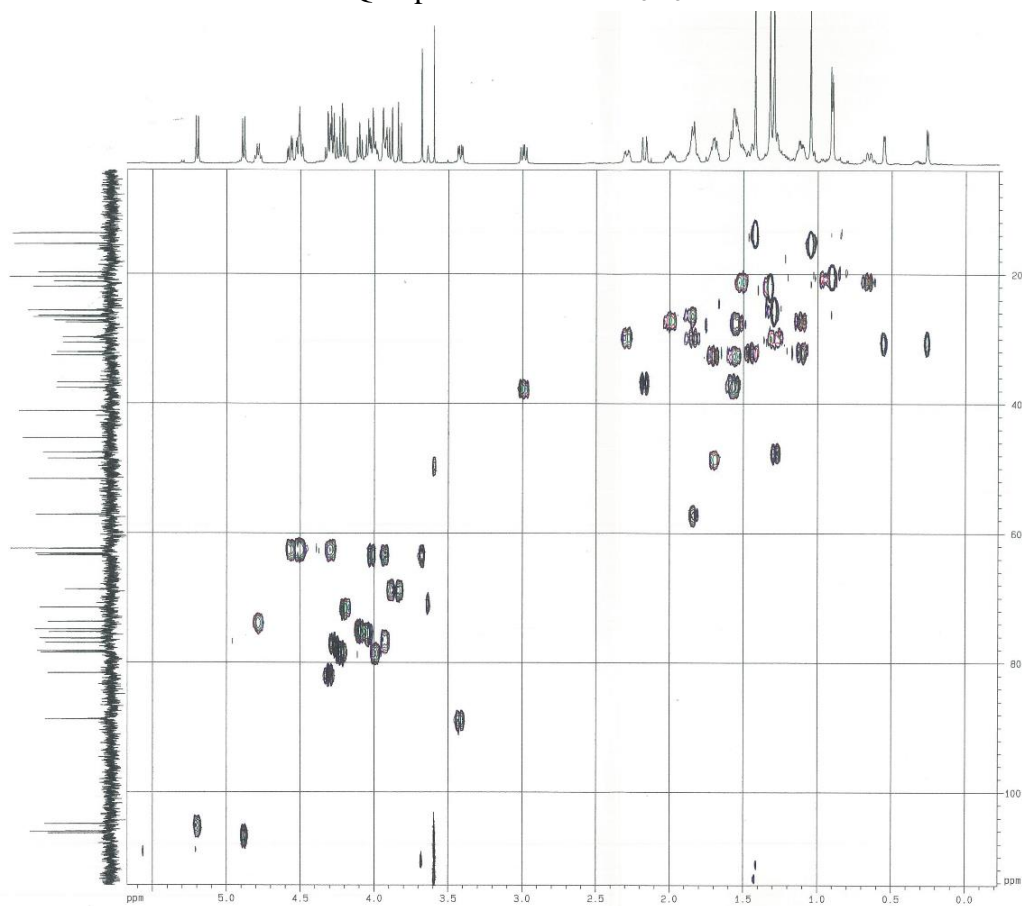



HMBC spectrum of **8** in C<sub>5</sub>D<sub>5</sub>N

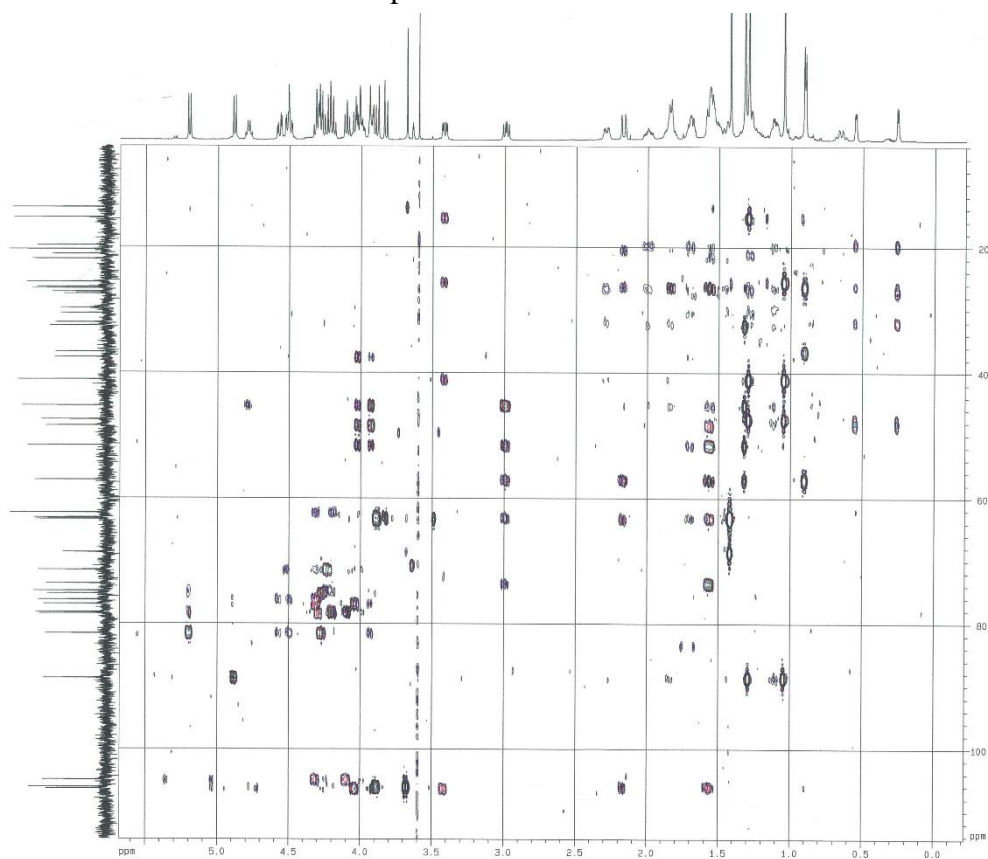

<sup>1</sup>H-NMR spectrum of **8a** in C<sub>5</sub>D<sub>5</sub>N

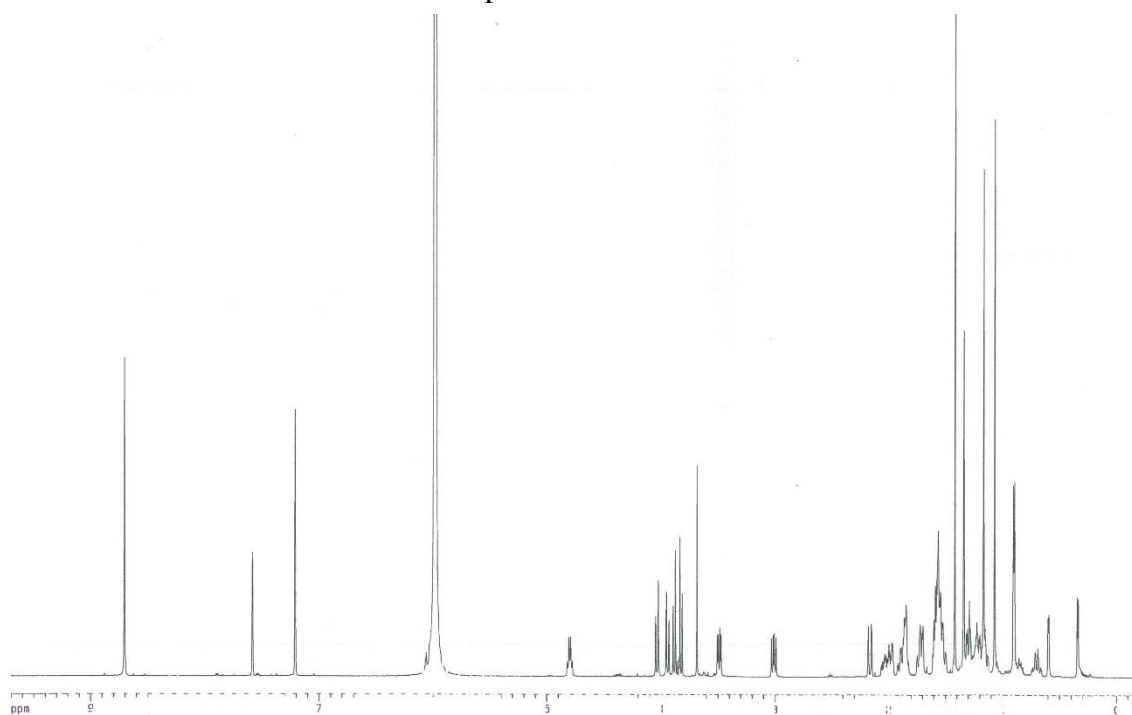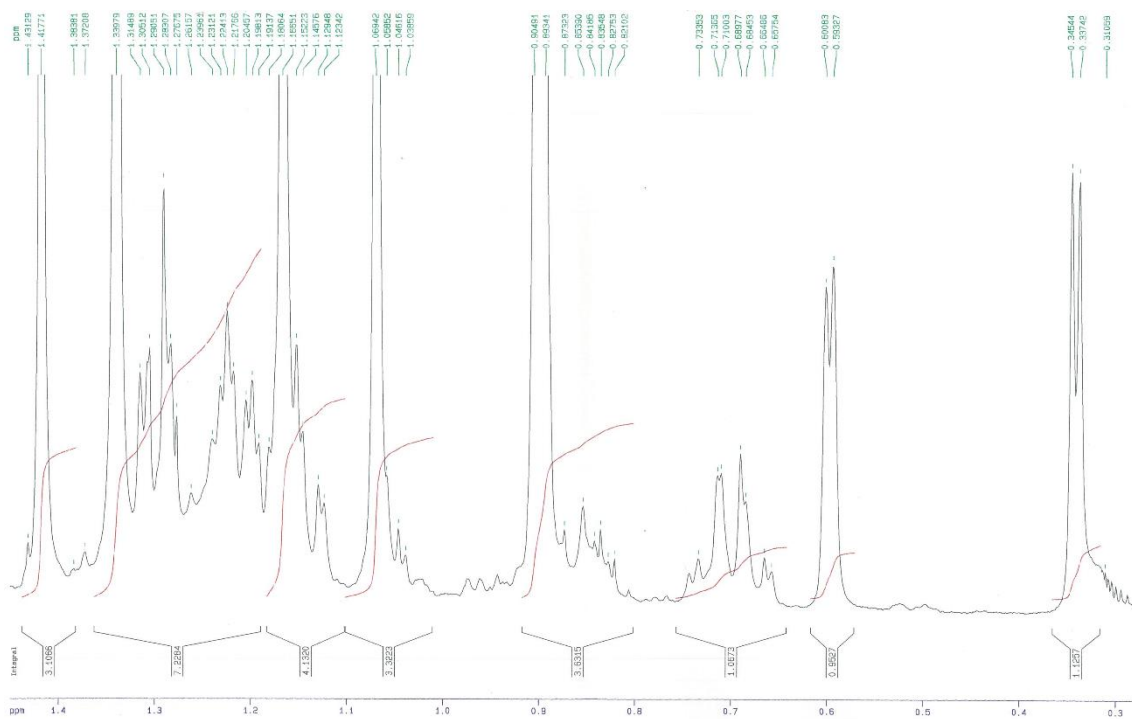

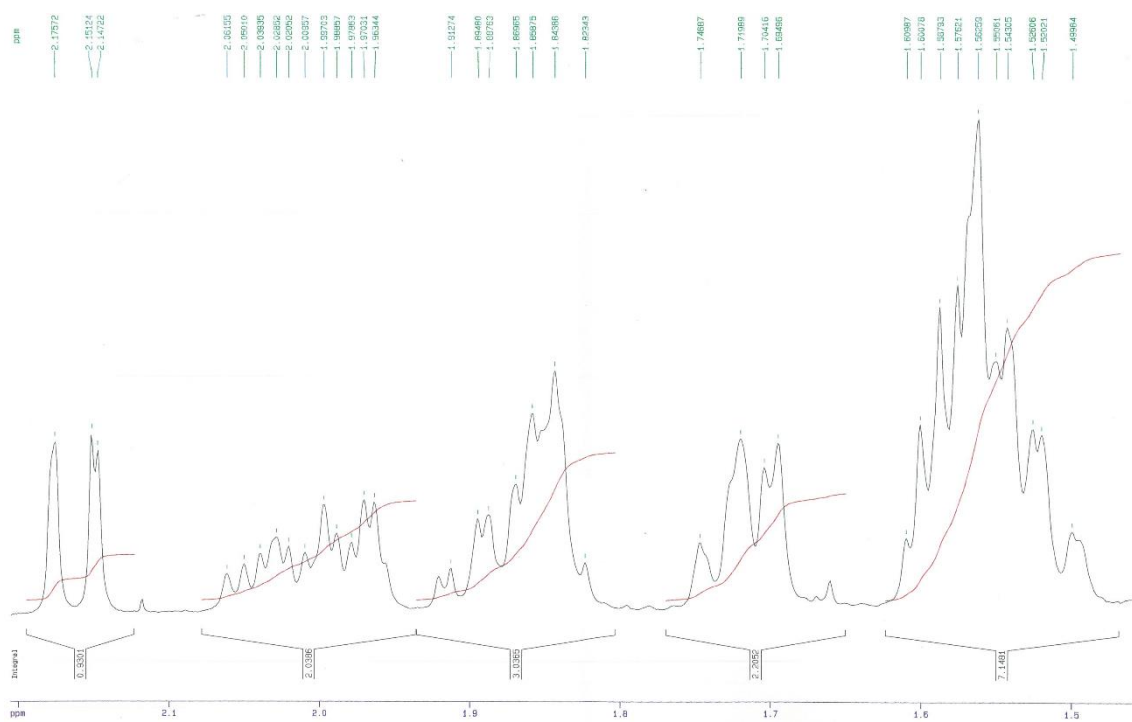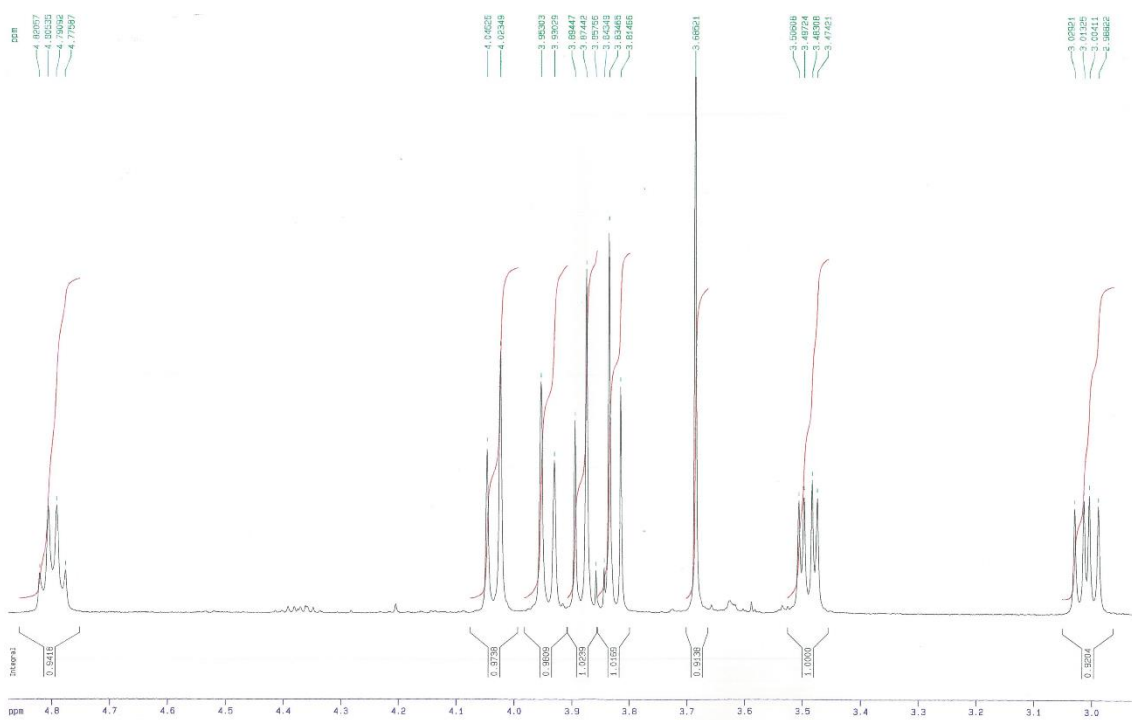

$^{13}\text{C}$ -NMR spectrum of **8a** in  $\text{C}_5\text{D}_5\text{N}$

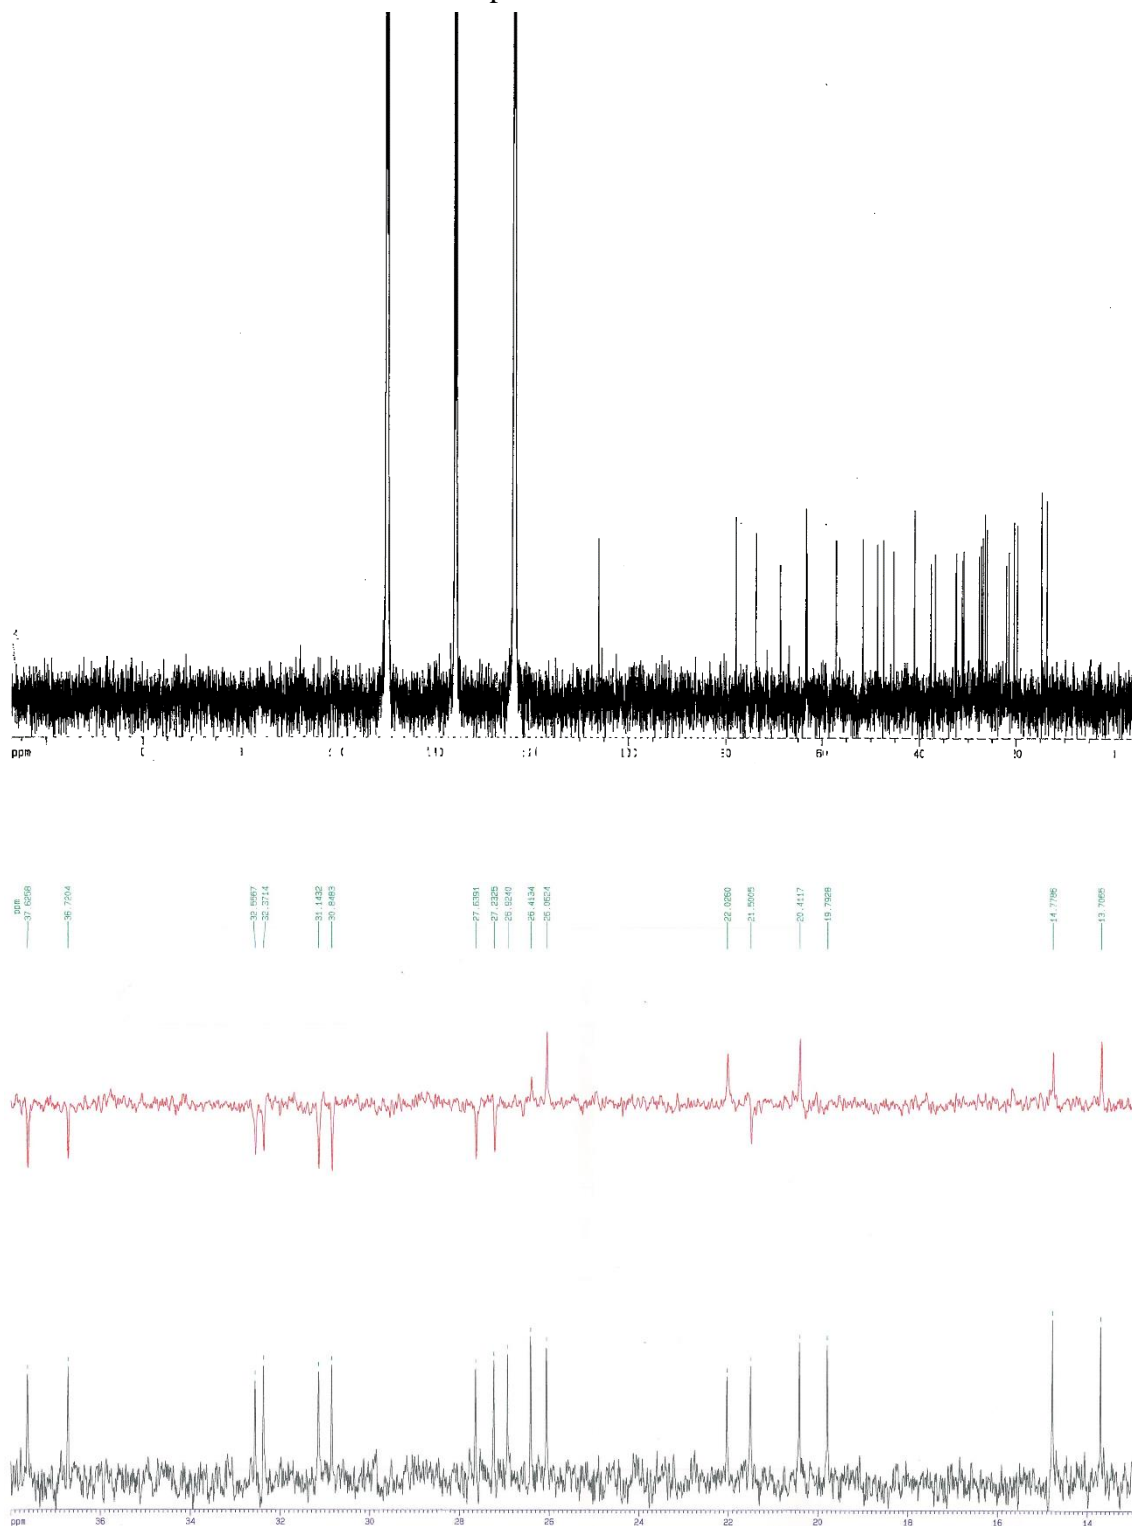

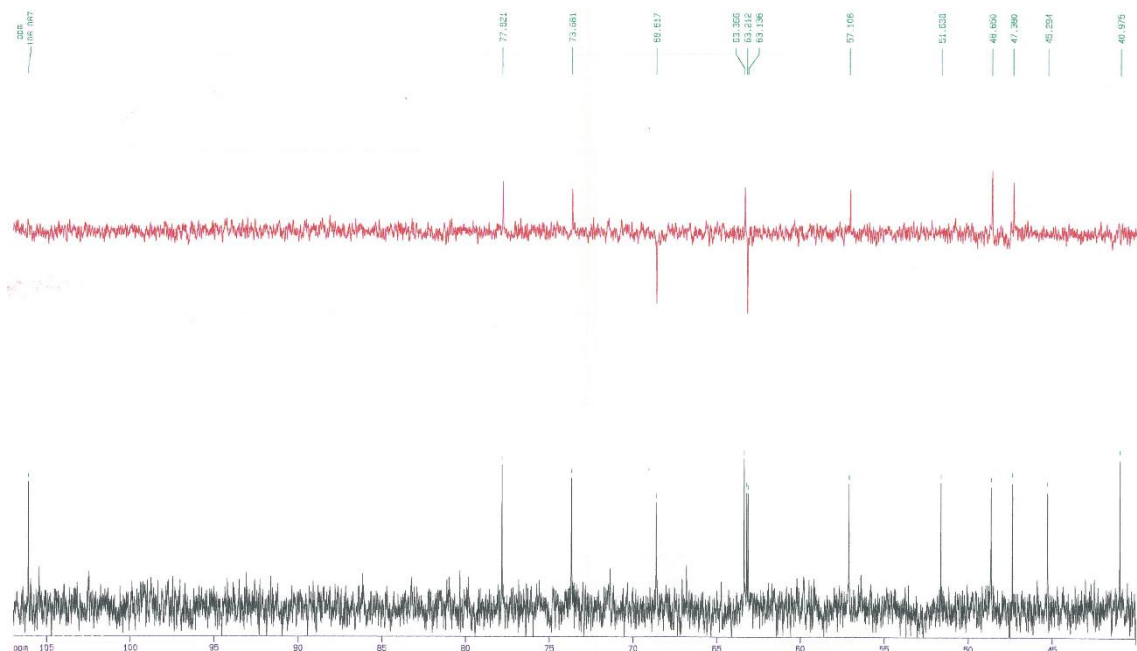

COSY spectrum of **8a** in  $C_5D_5N$

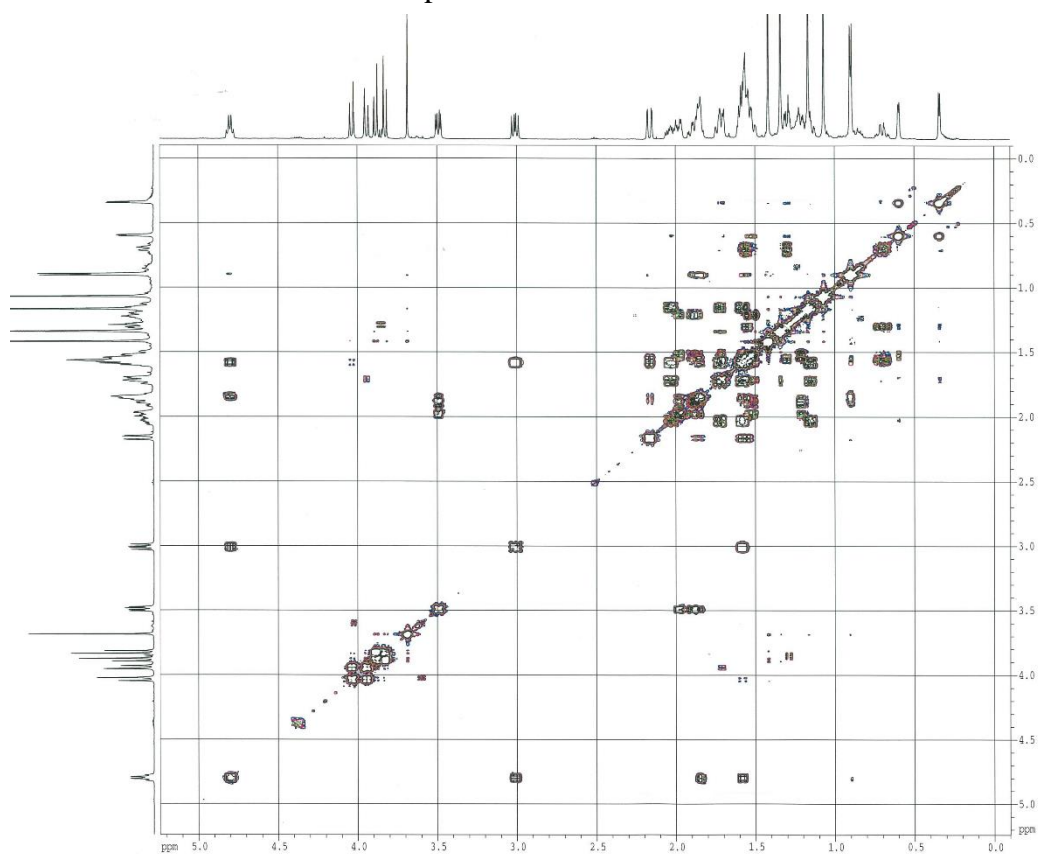

HMQC spectrum of **8a** in C<sub>5</sub>D<sub>5</sub>N

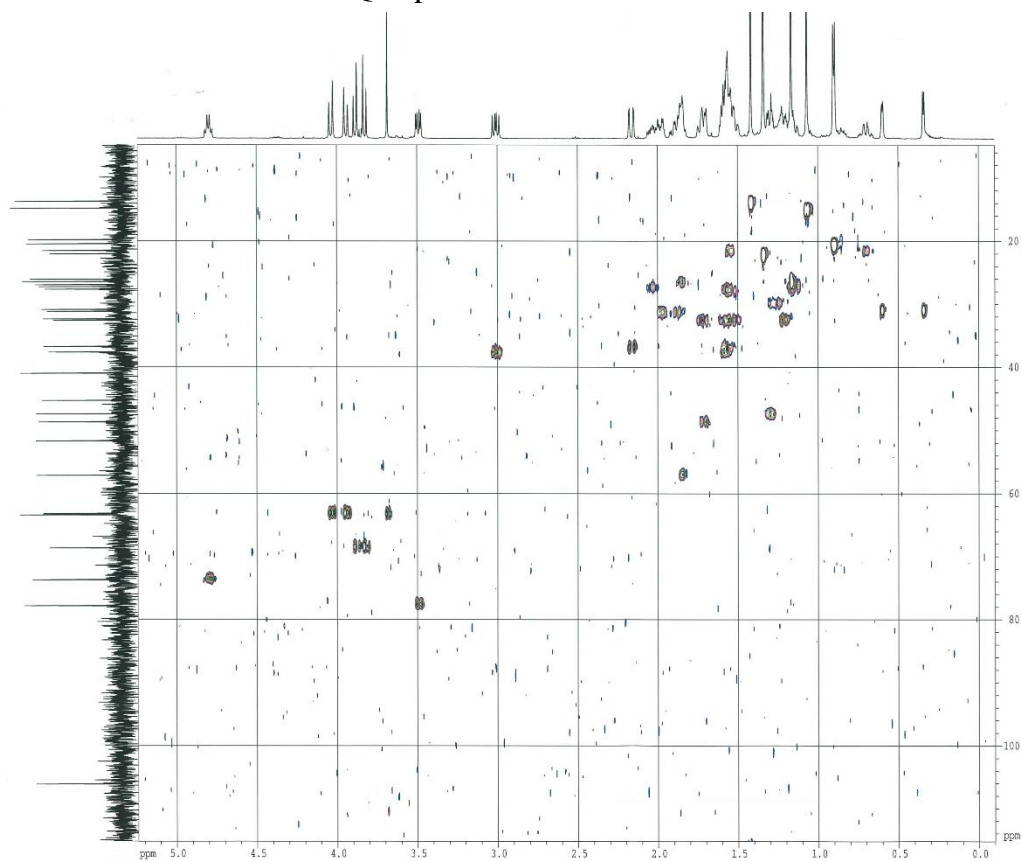

HMBC spectrum of **8a** in C<sub>5</sub>D<sub>5</sub>N

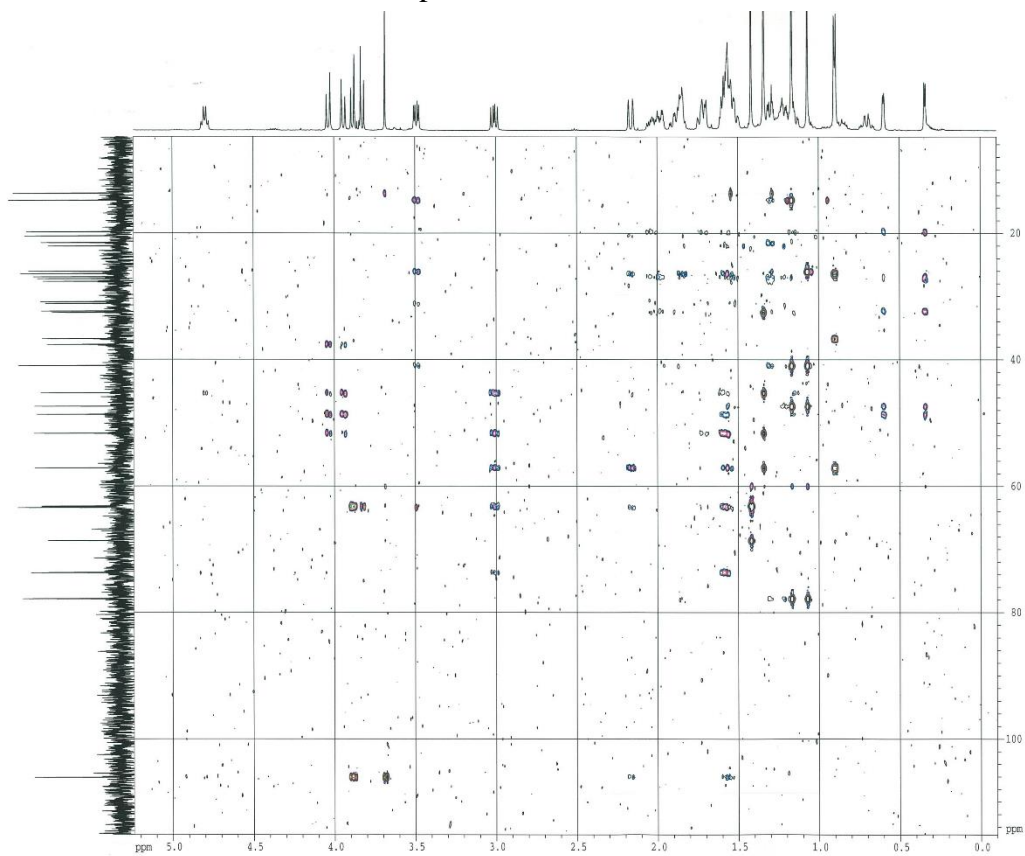

NOESY spectrum of **8a** in C<sub>5</sub>D<sub>5</sub>N

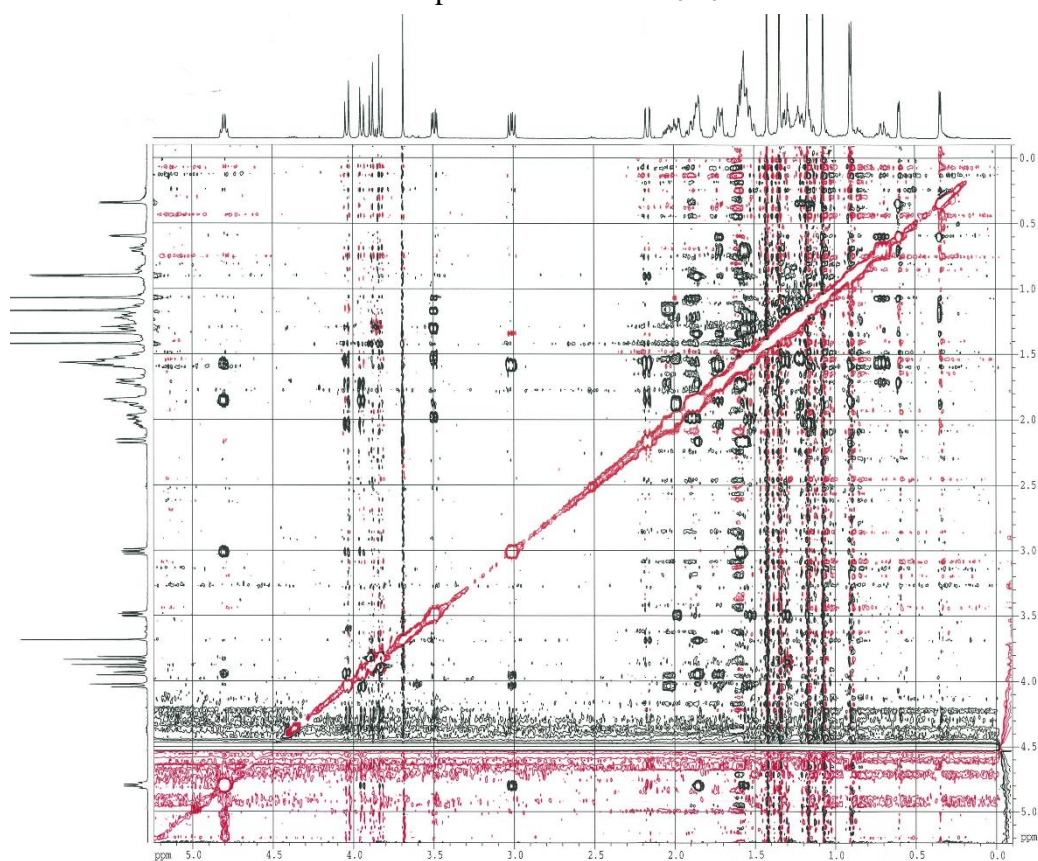



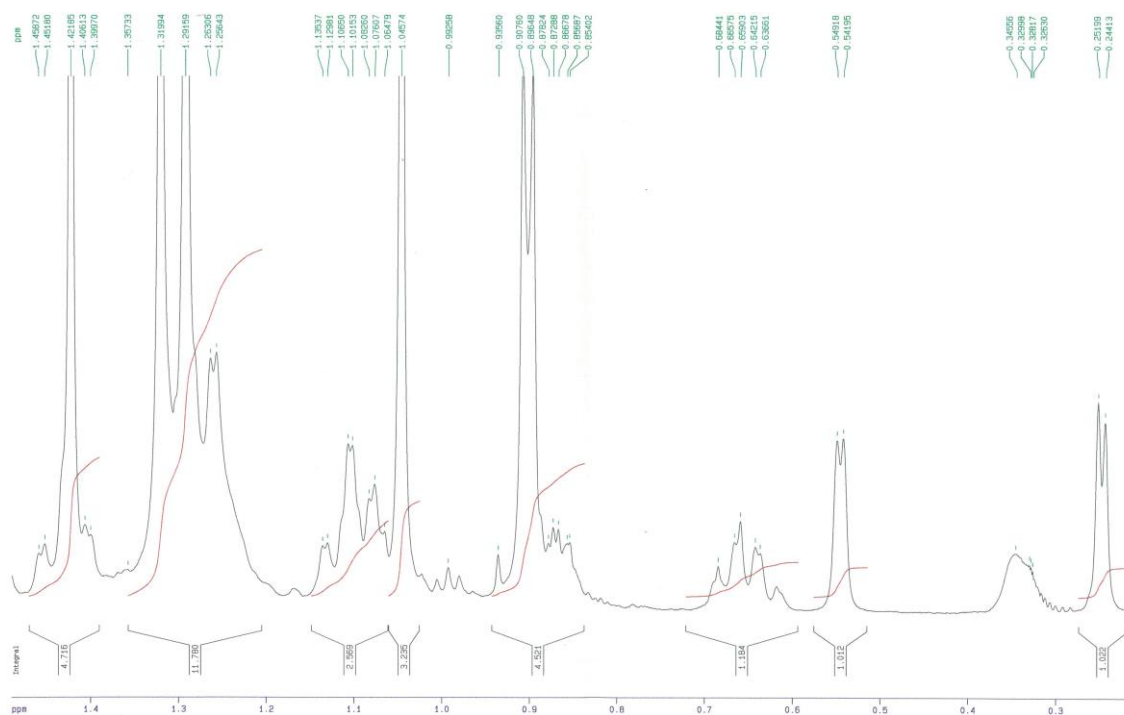



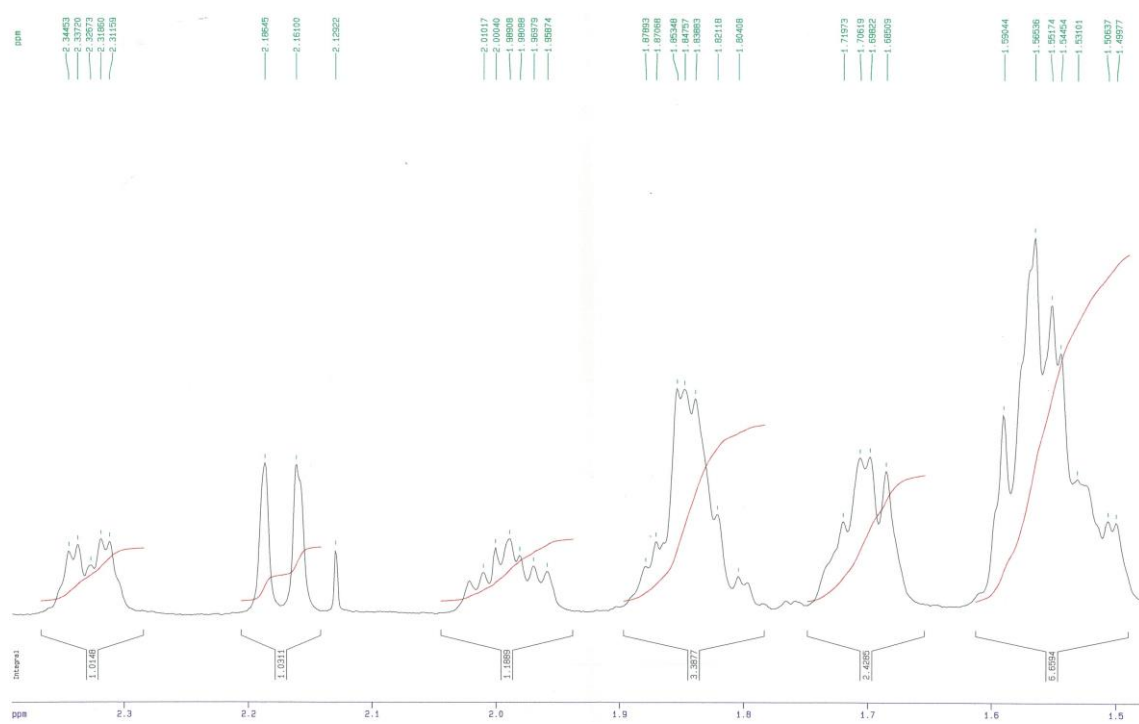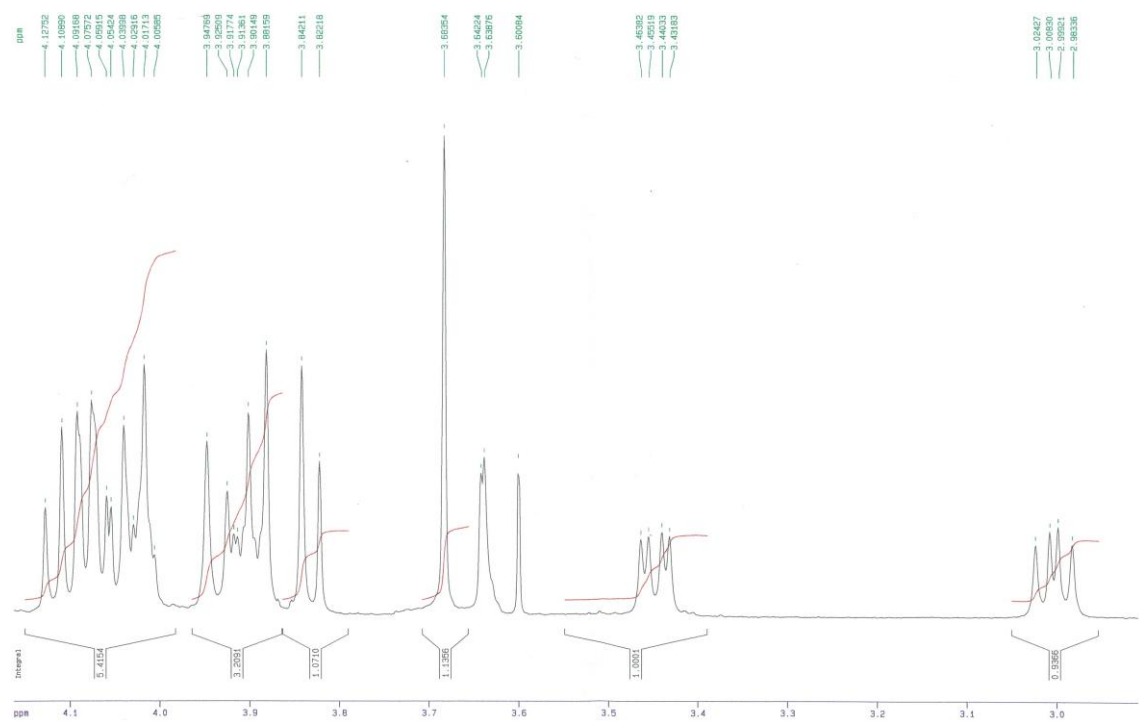

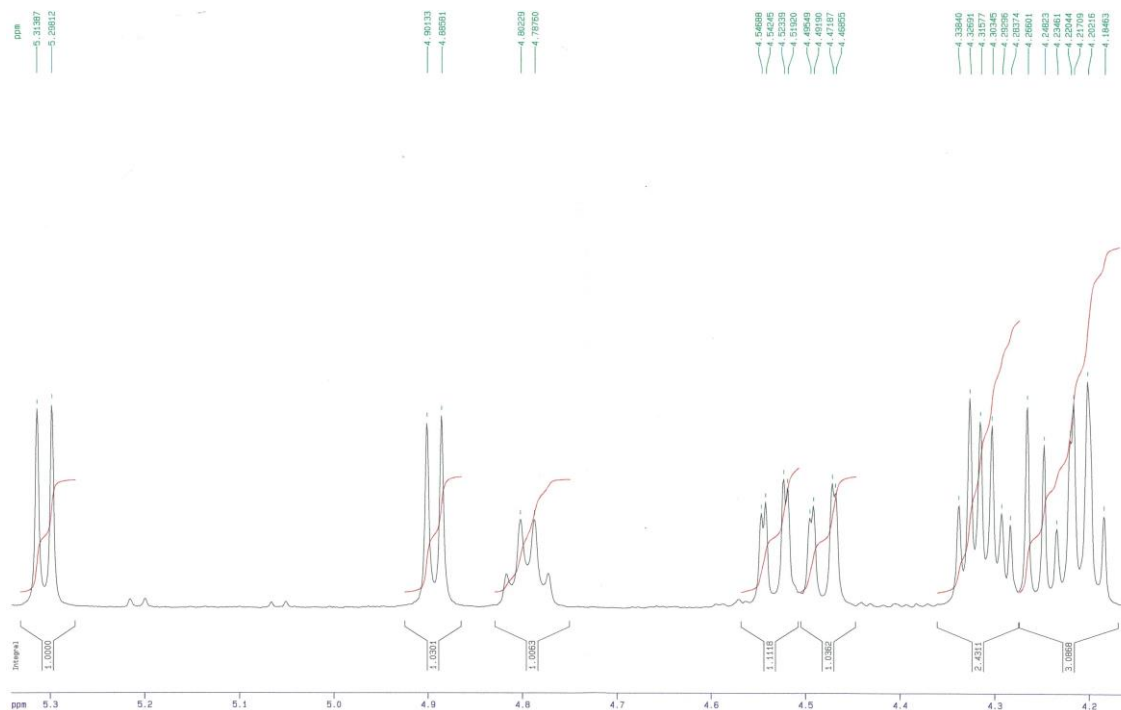

$^{13}\text{C}$ -NMR spectrum of **9** in  $\text{C}_5\text{D}_5\text{N}$

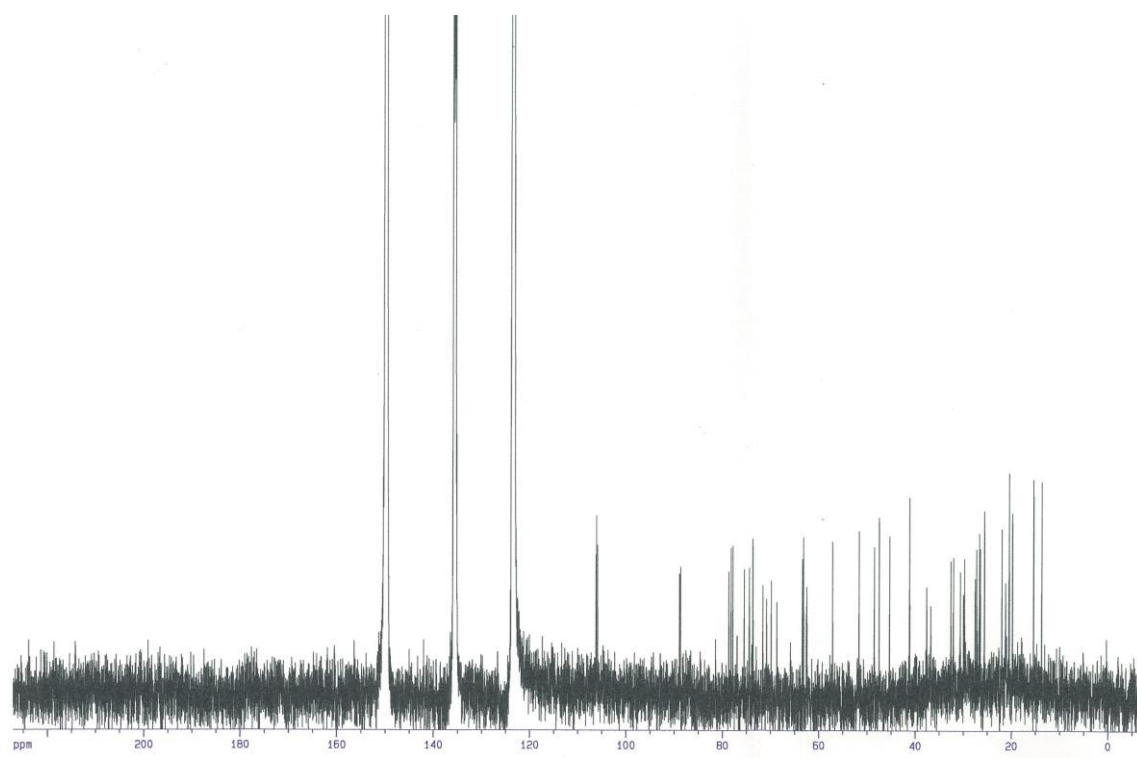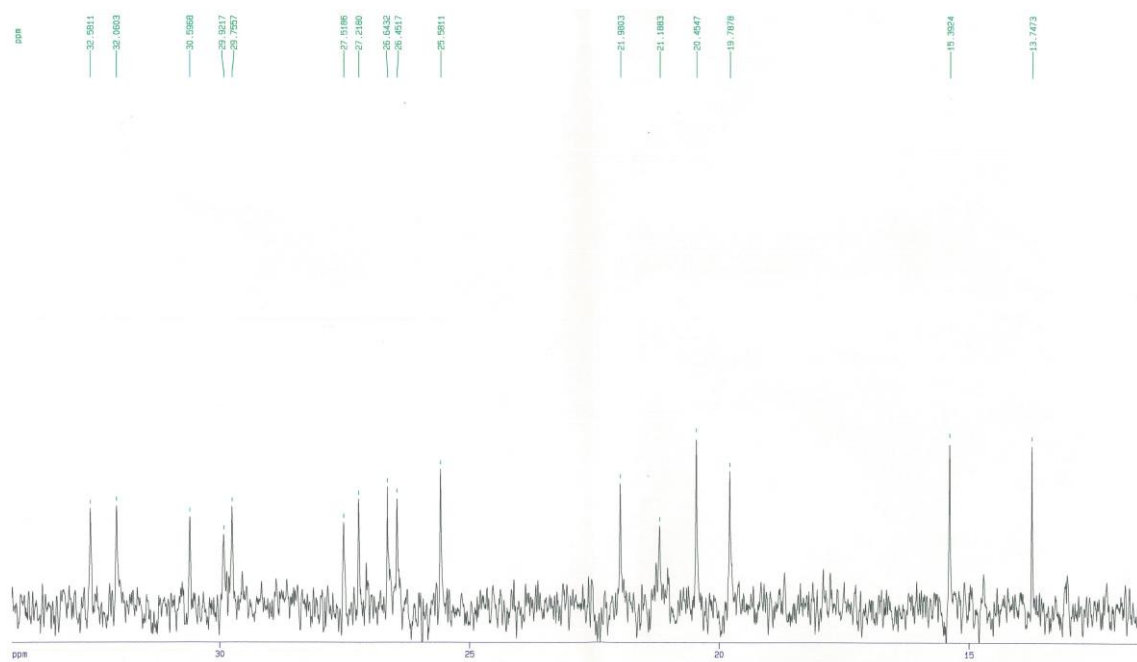

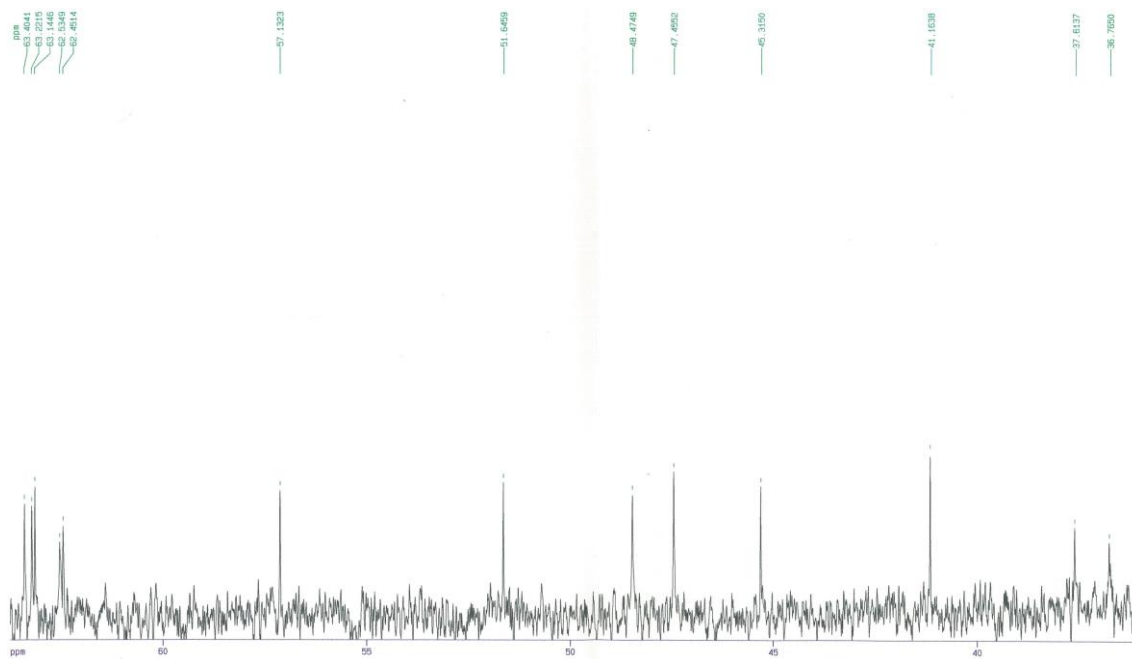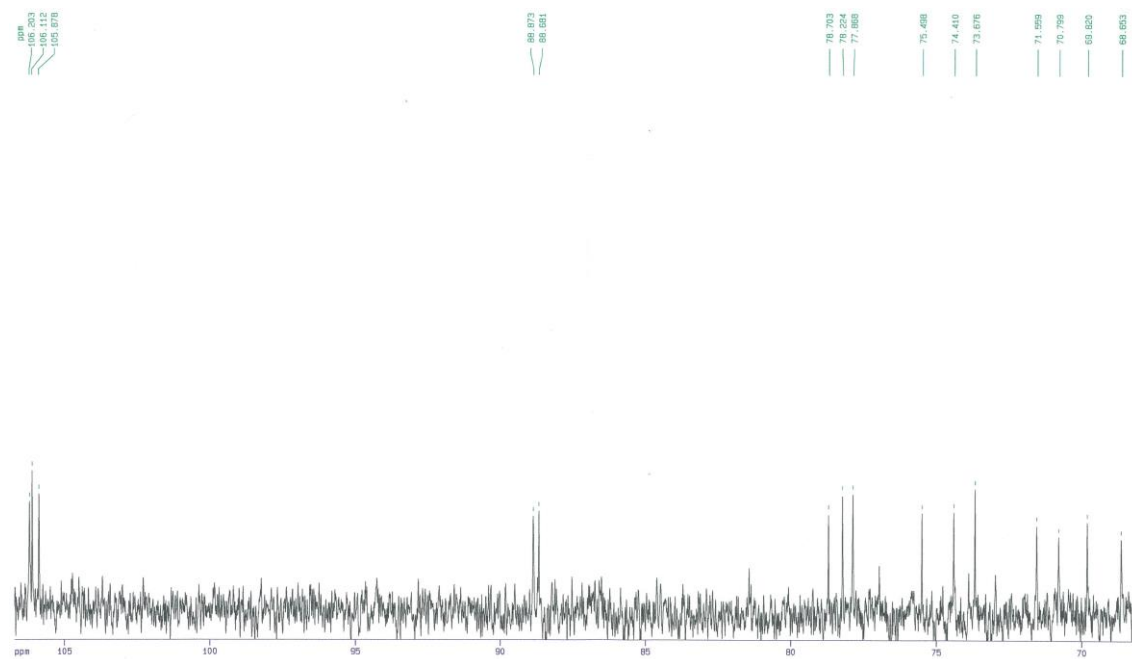

COSY spectrum of **9** in C<sub>5</sub>D<sub>5</sub>N

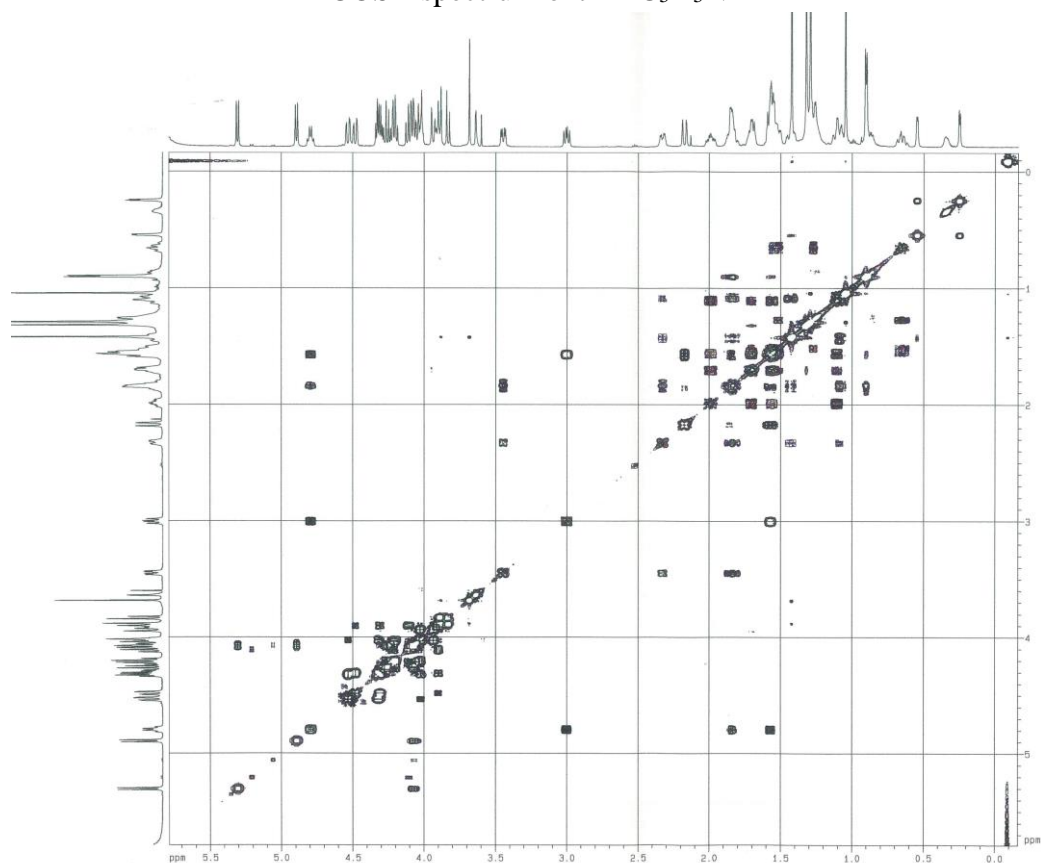

HMQC spectrum of **9** in C<sub>5</sub>D<sub>5</sub>N

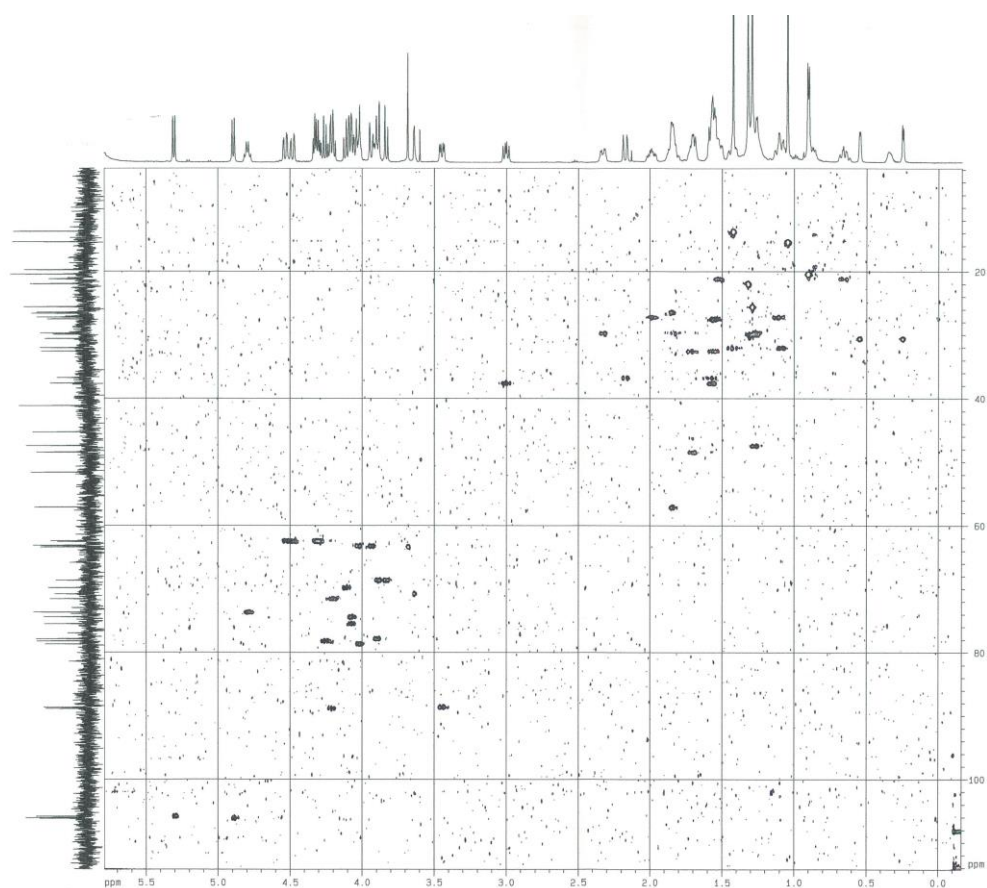

HMBC spectrum of **9** in C<sub>5</sub>D<sub>5</sub>N

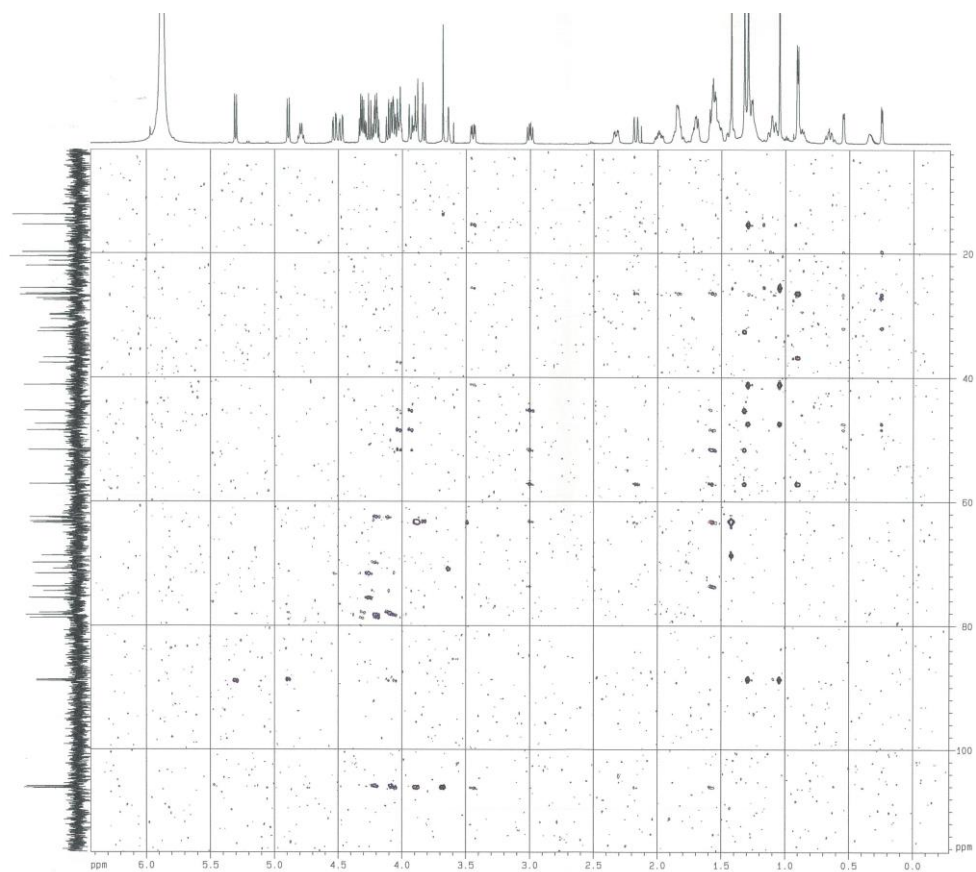

NOESY spectrum of **9** in C<sub>5</sub>D<sub>5</sub>N

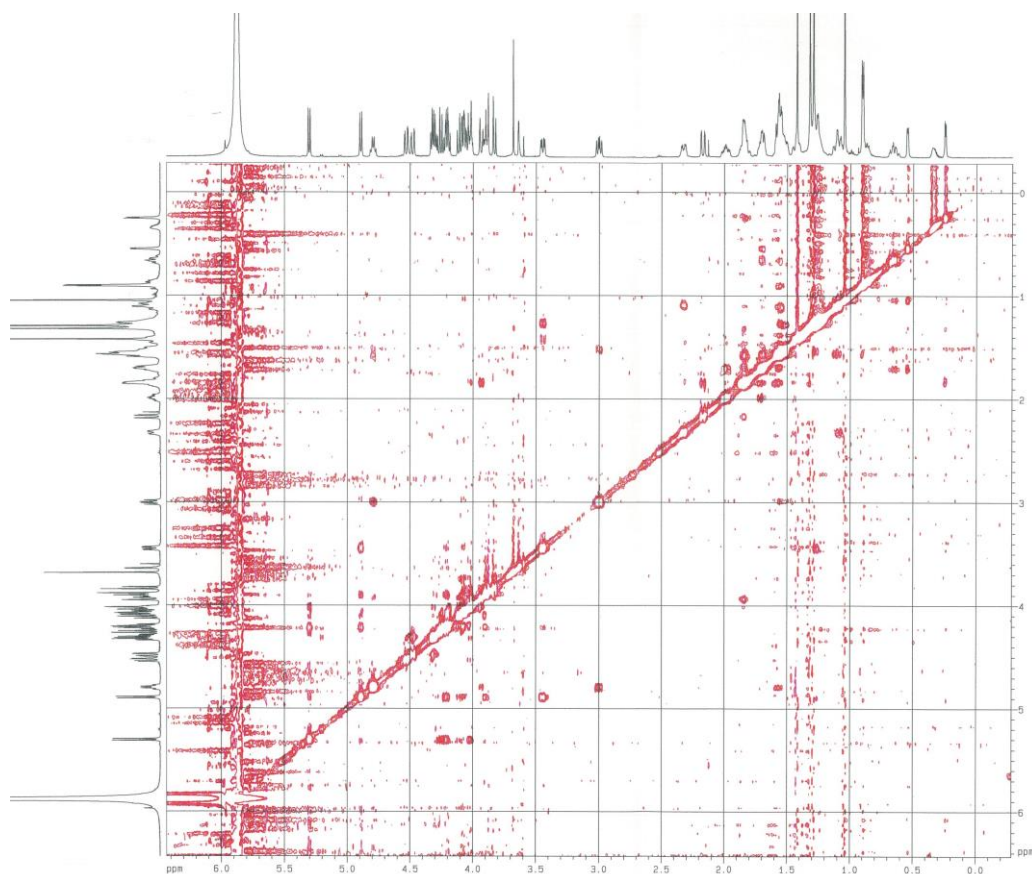

<sup>1</sup>H-NMR spectrum of **10** in C<sub>5</sub>D<sub>5</sub>N

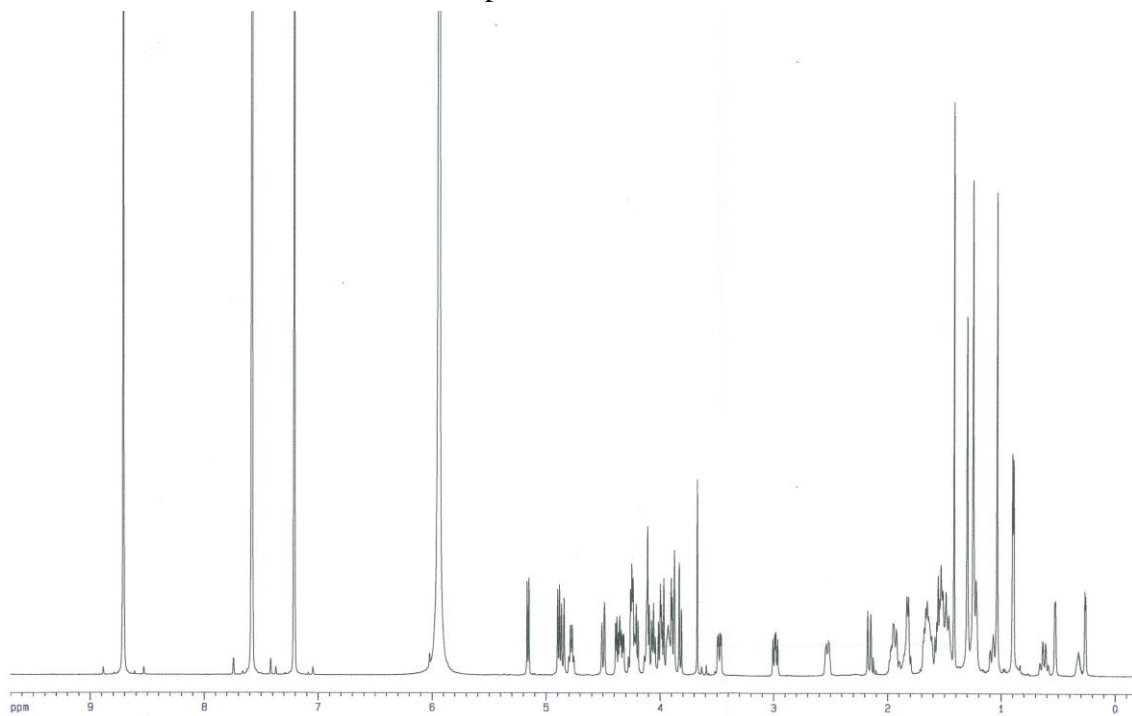

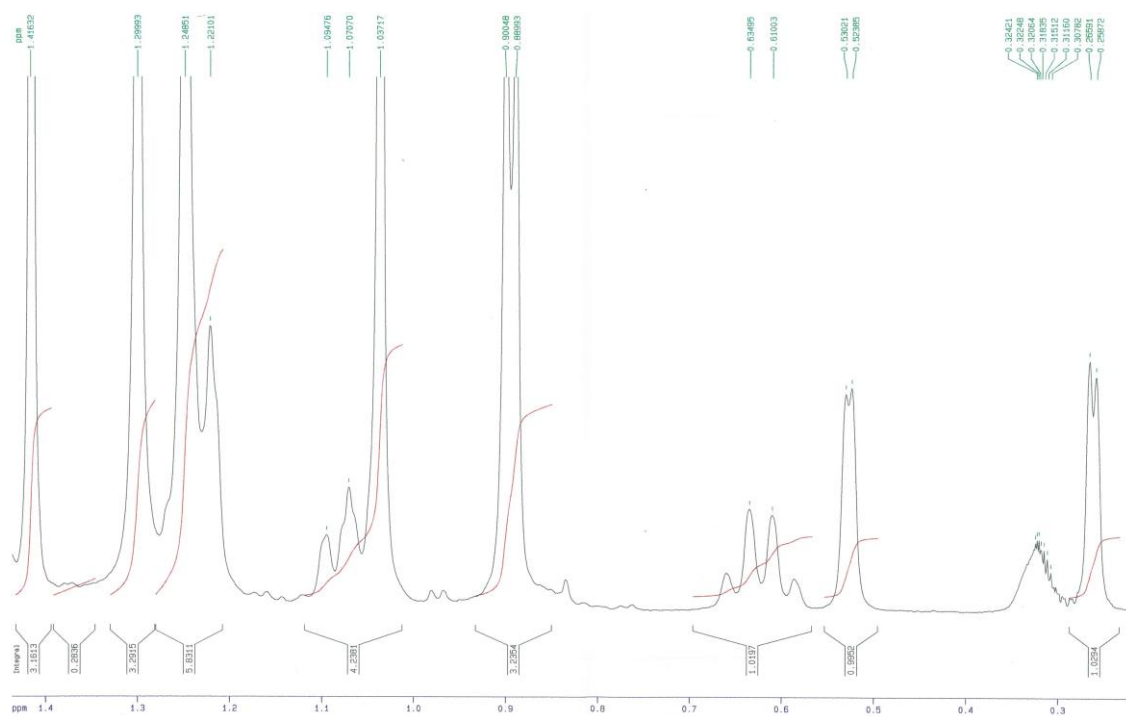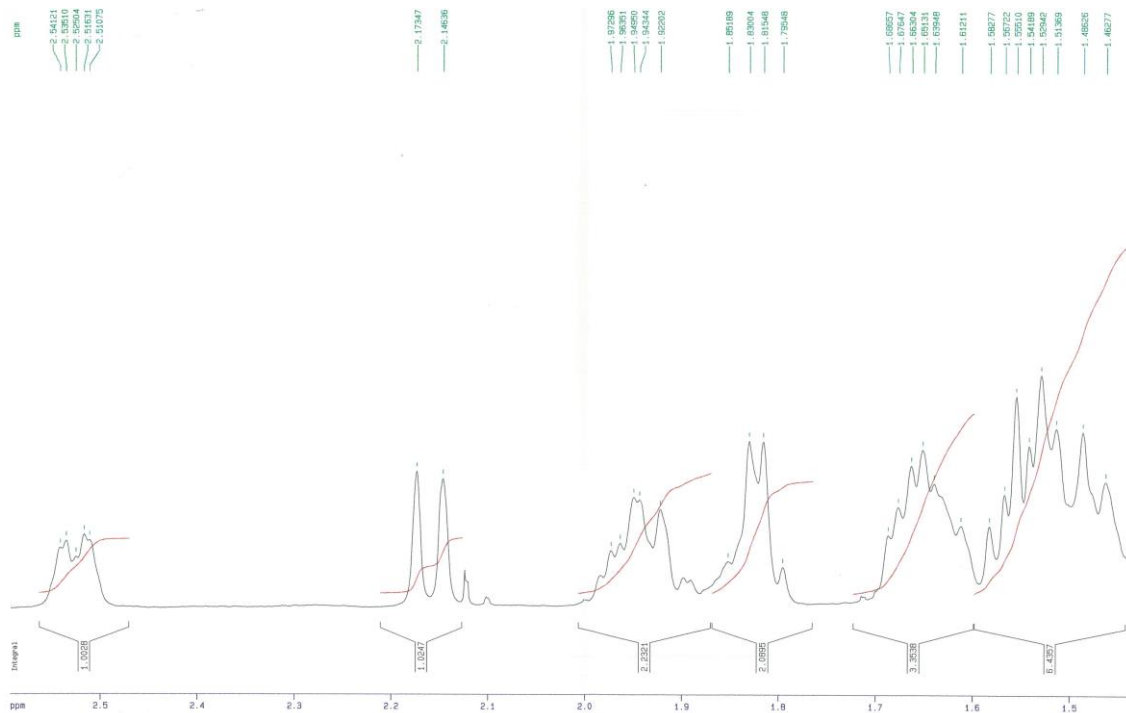



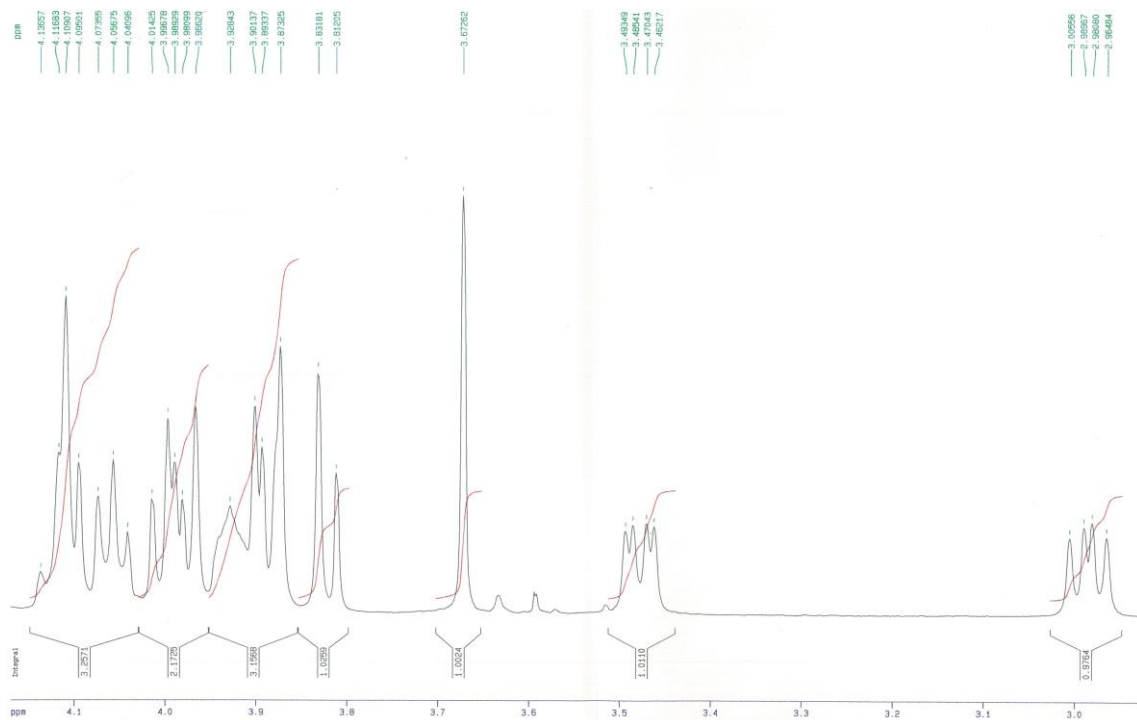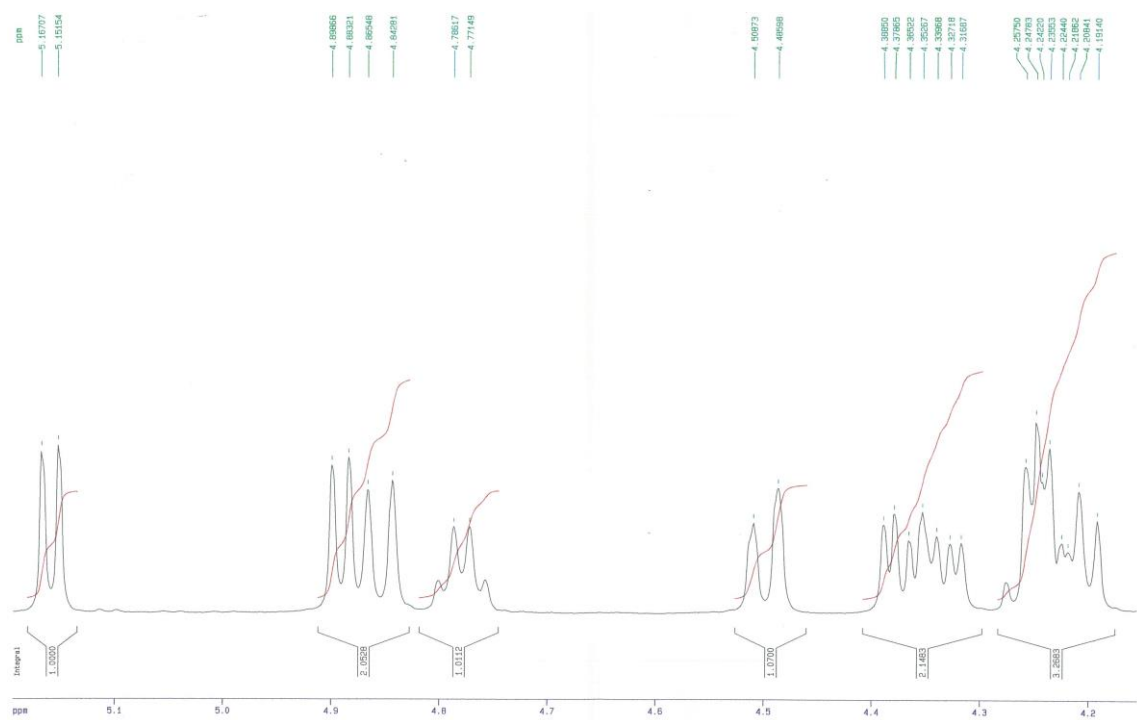

$^{13}\text{C}$ -NMR spectrum of **10** in  $\text{C}_5\text{D}_5\text{N}$

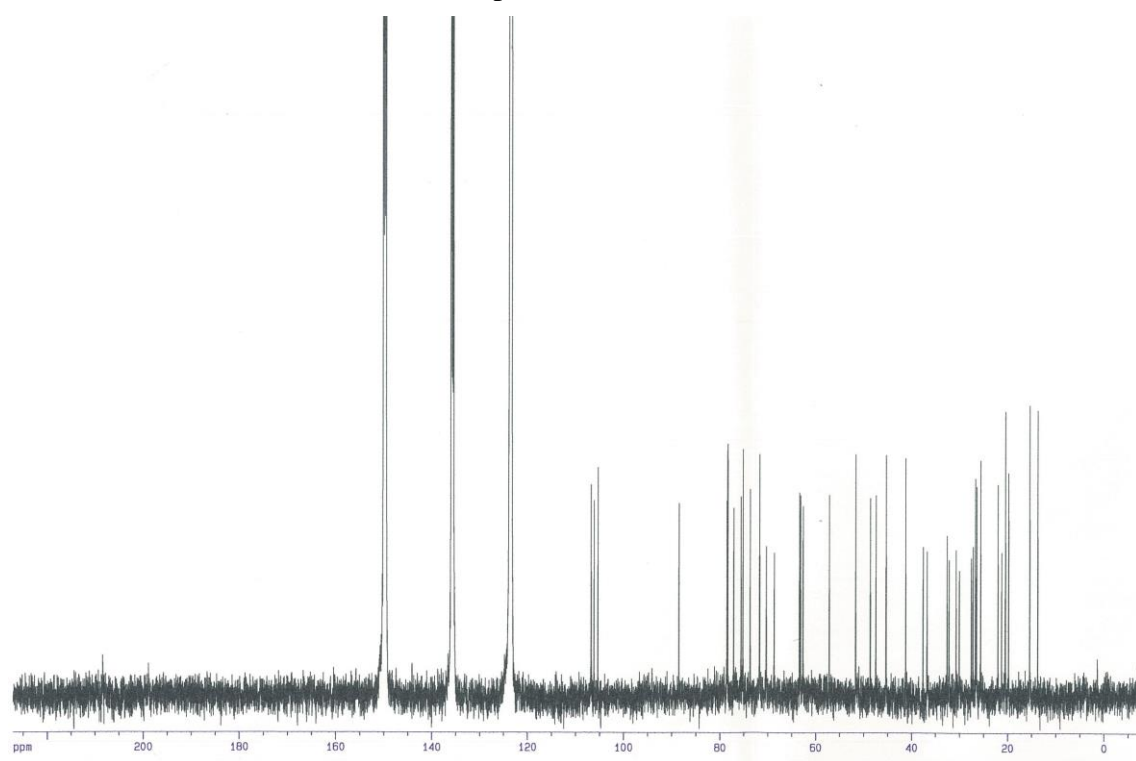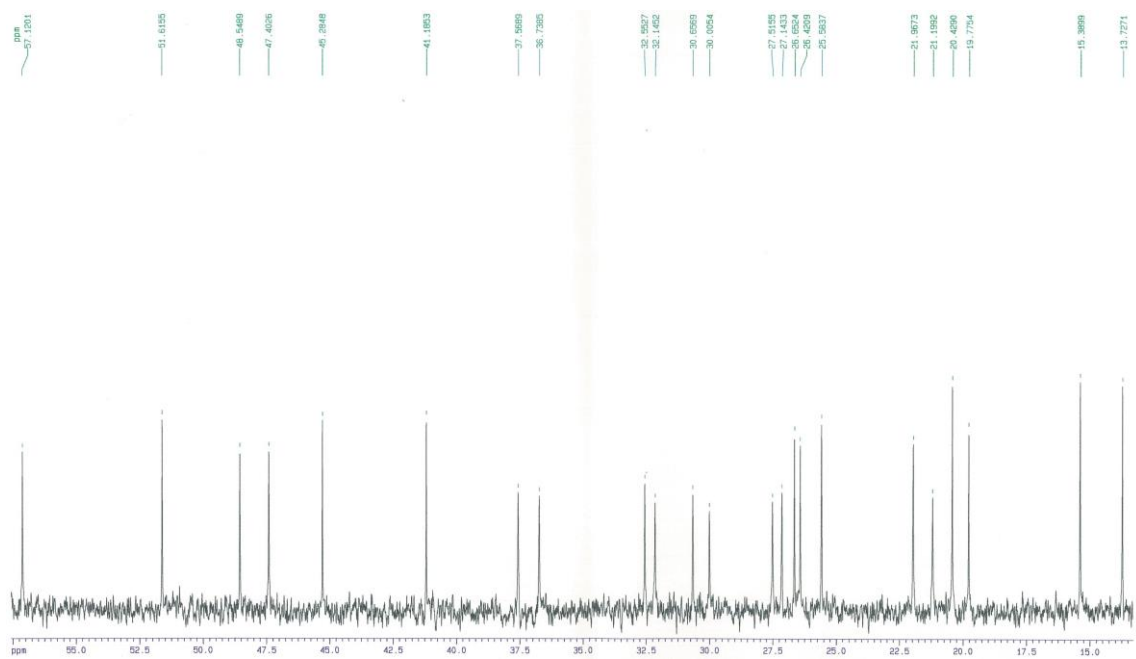

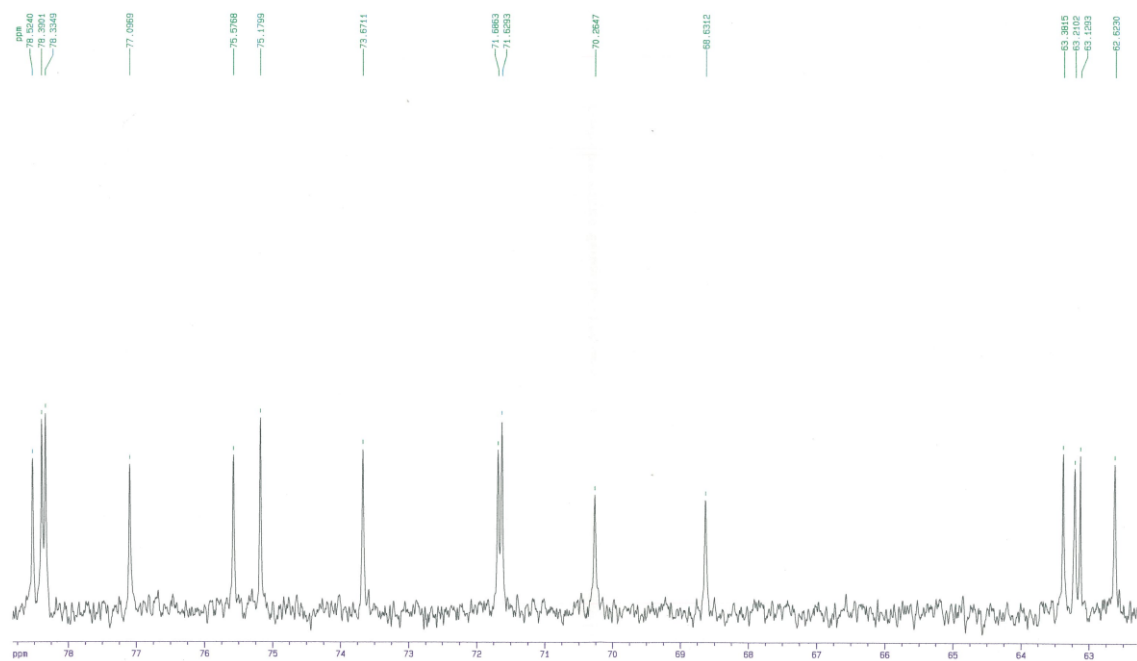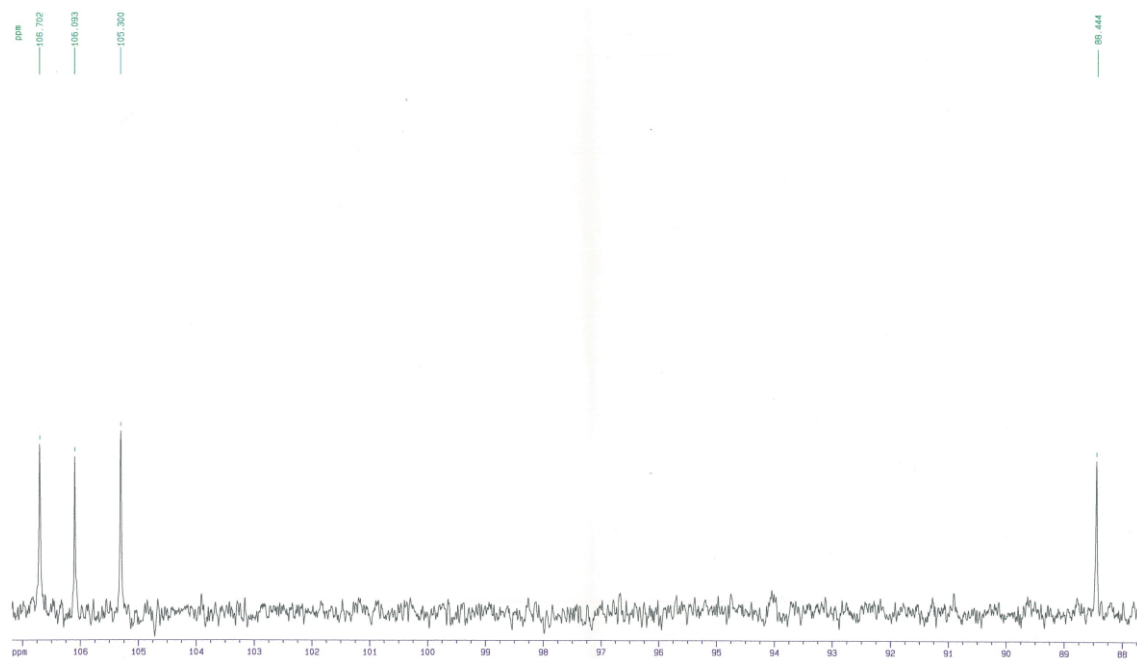

COSY spectrum of **10** in C<sub>5</sub>D<sub>5</sub>N

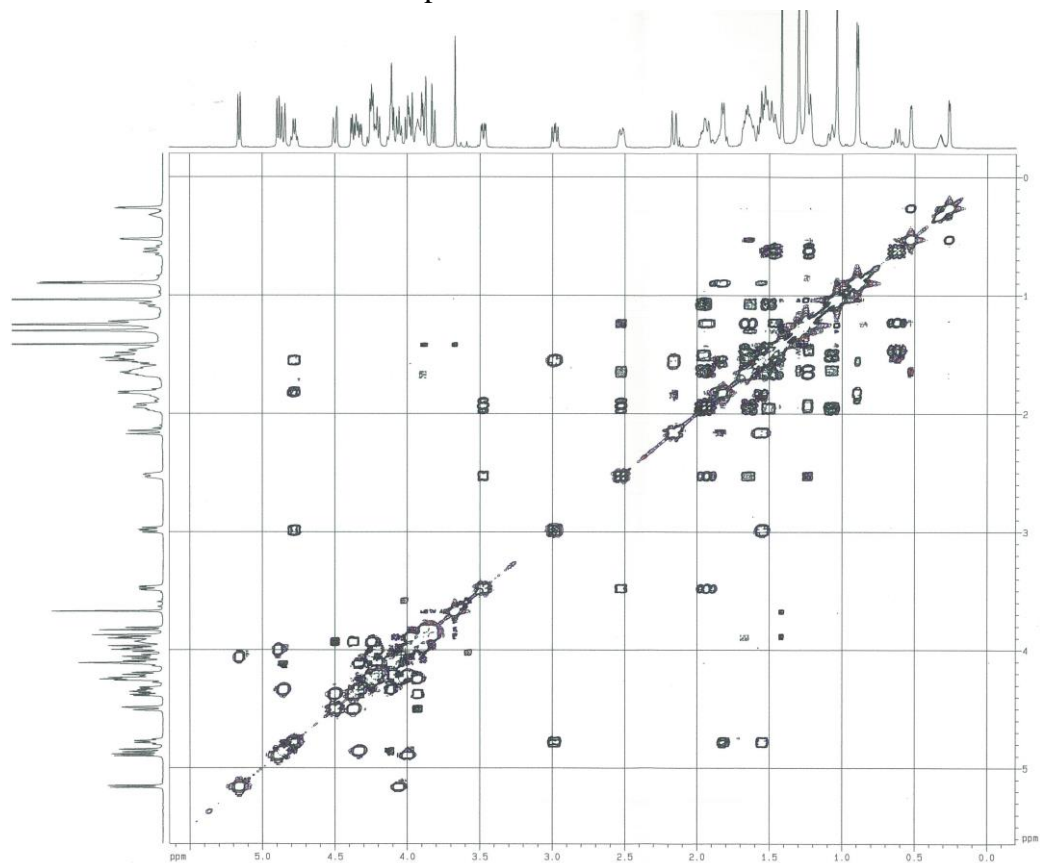

HMQC spectrum of **10** in C<sub>5</sub>D<sub>5</sub>N

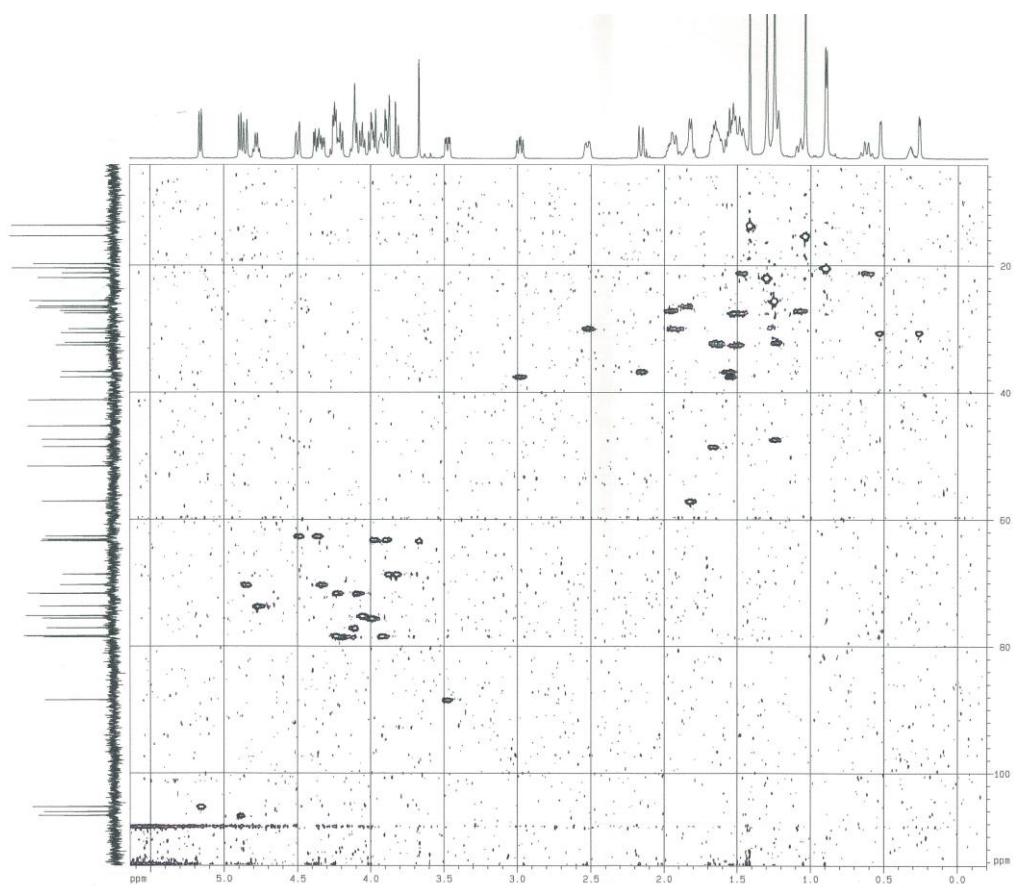

HMBC spectrum of **10** in C<sub>5</sub>D<sub>5</sub>N

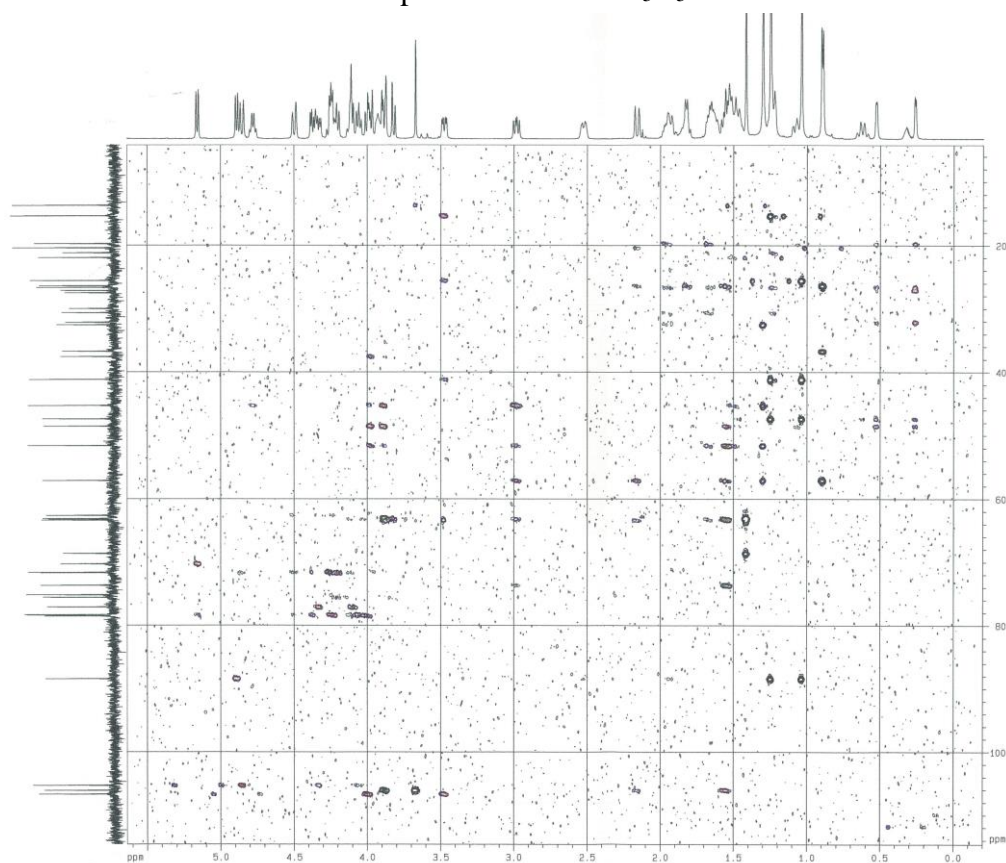

<sup>1</sup>H-NMR spectrum of **11** in C<sub>5</sub>D<sub>5</sub>N

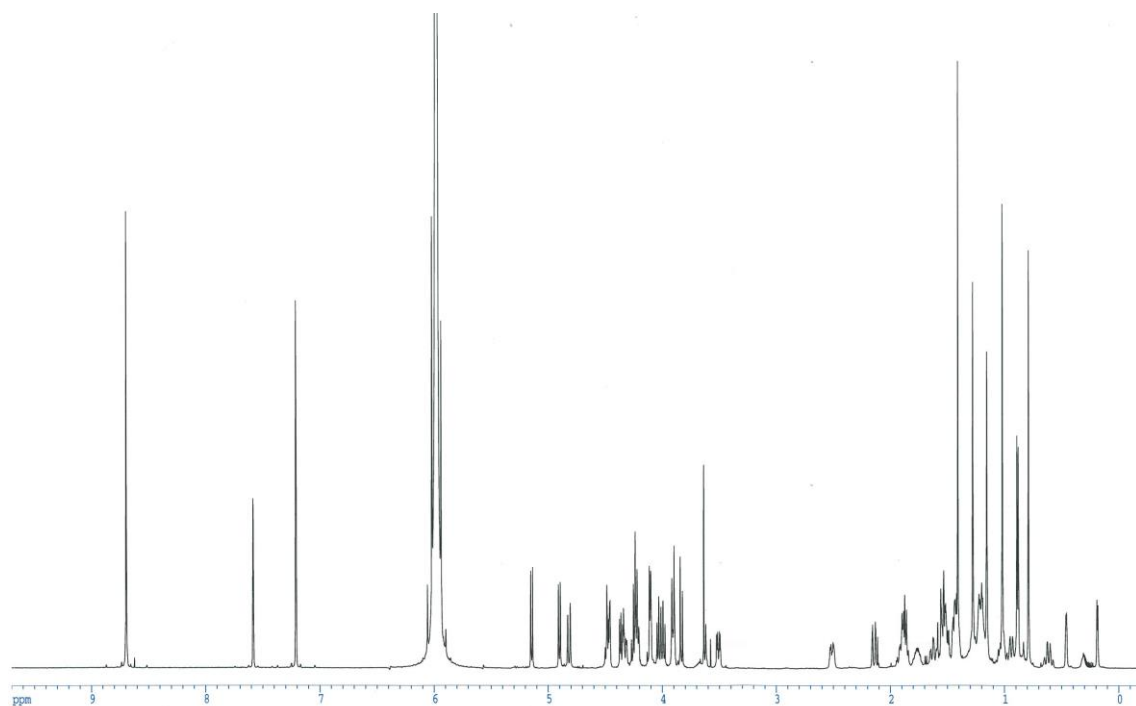

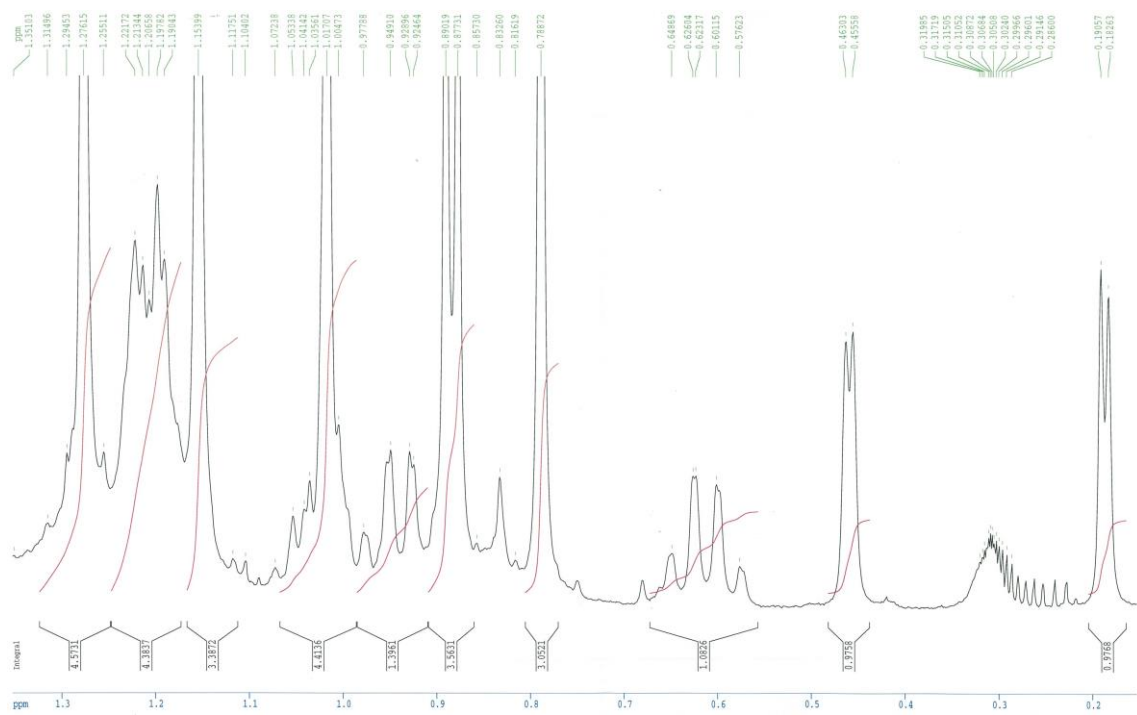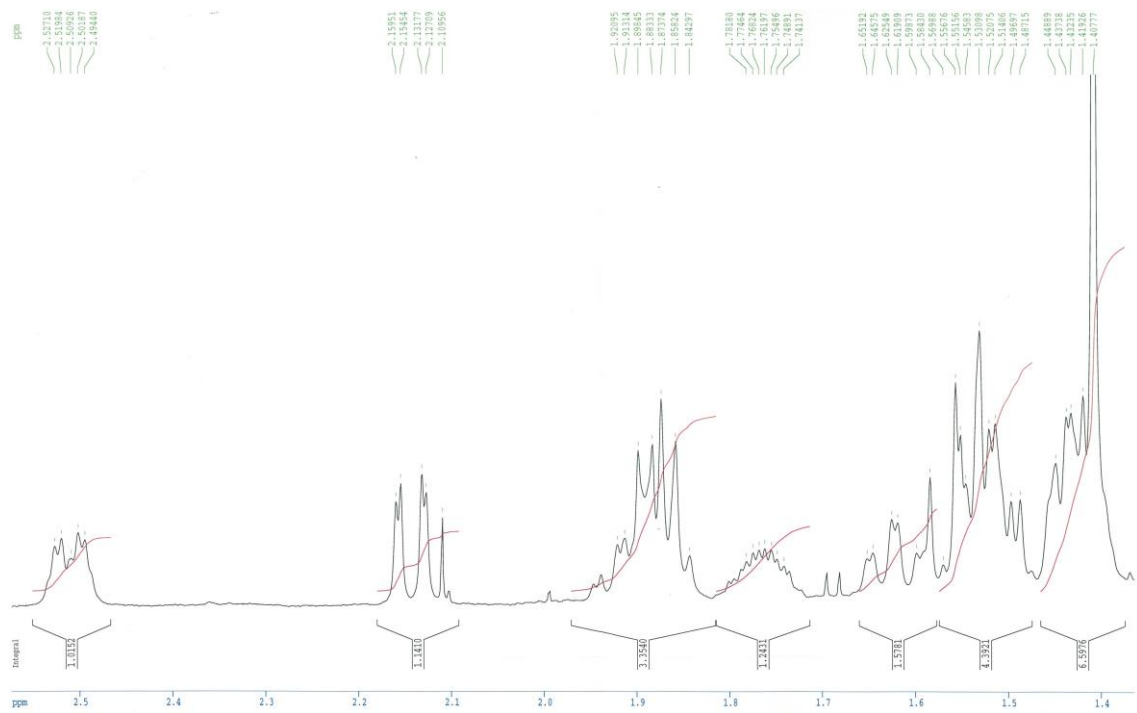

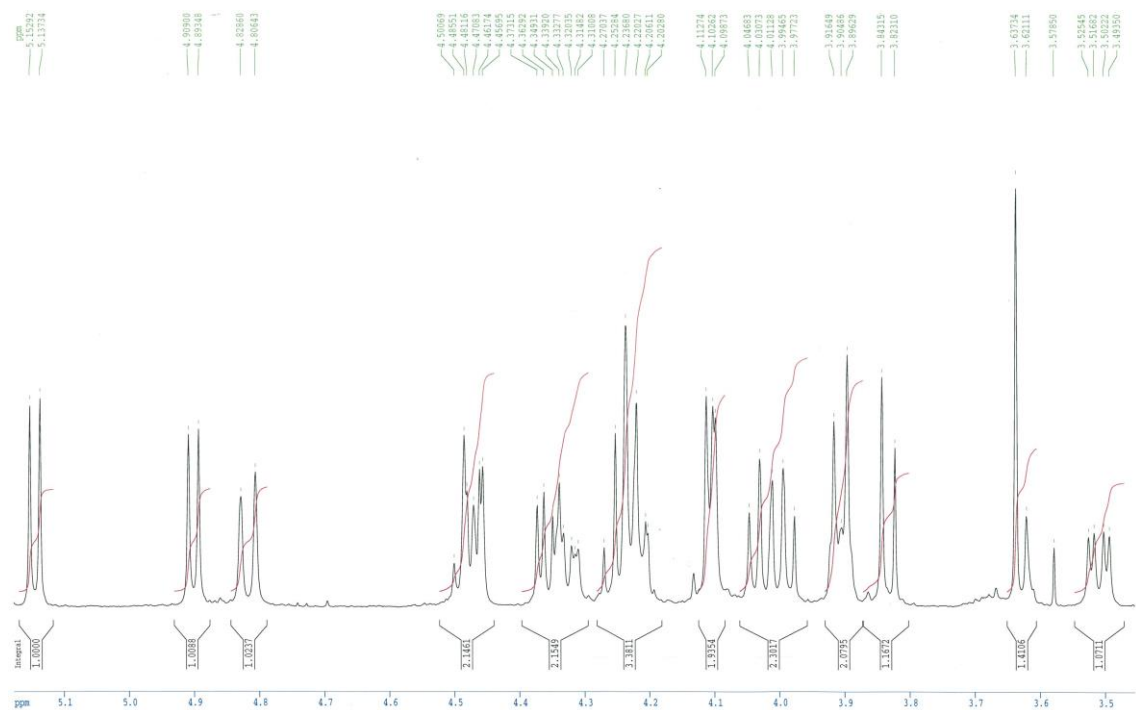

$^{13}\text{C}$ -NMR spectrum of **11** in  $\text{C}_5\text{D}_5\text{N}$

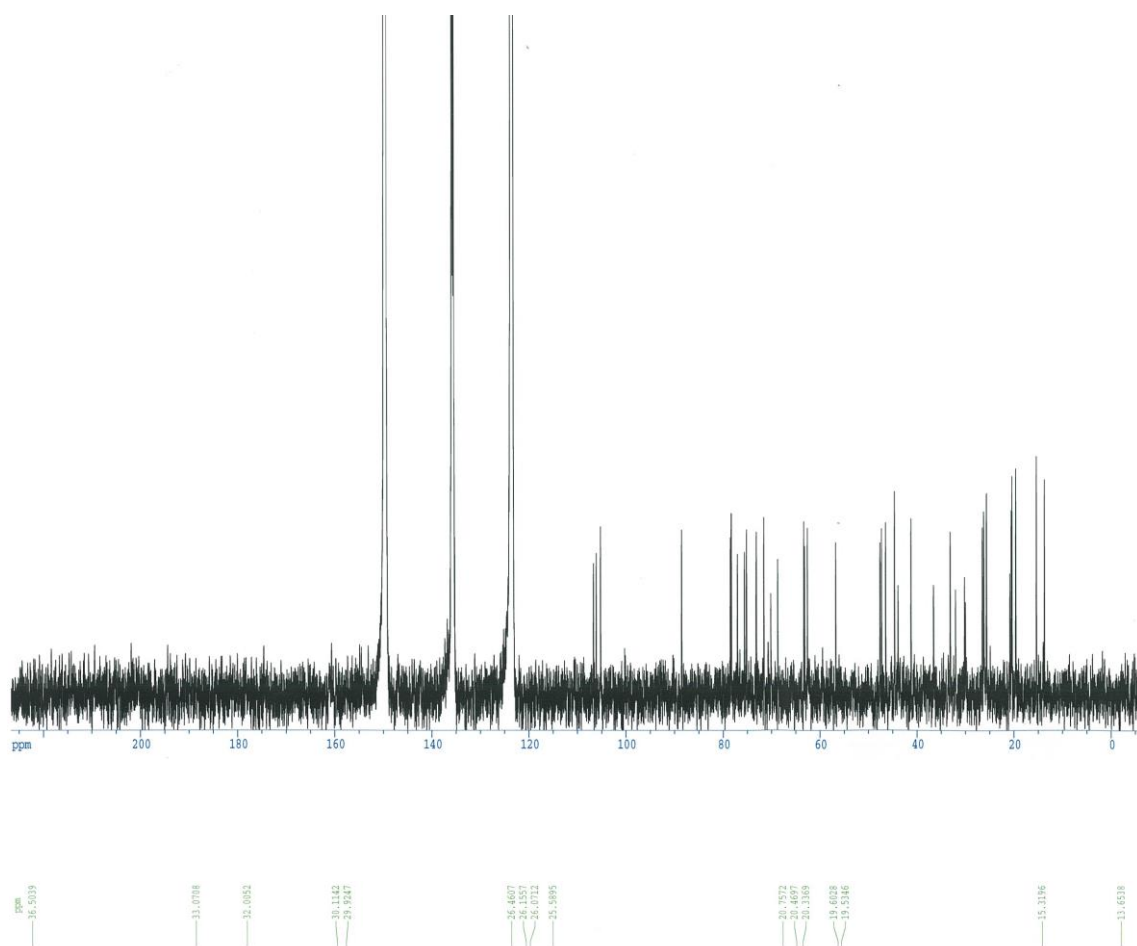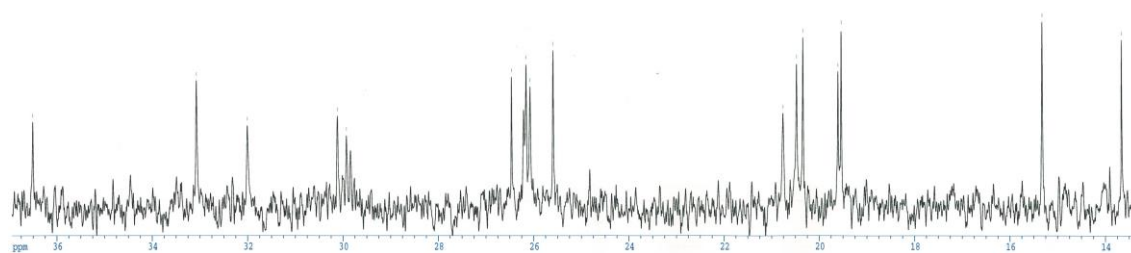



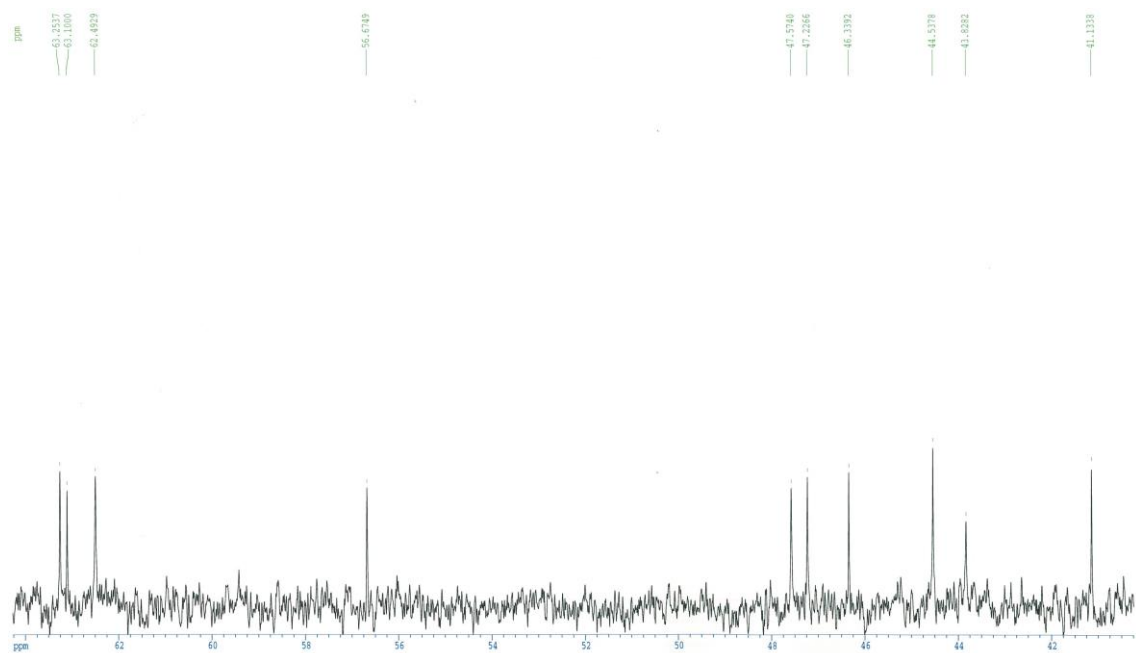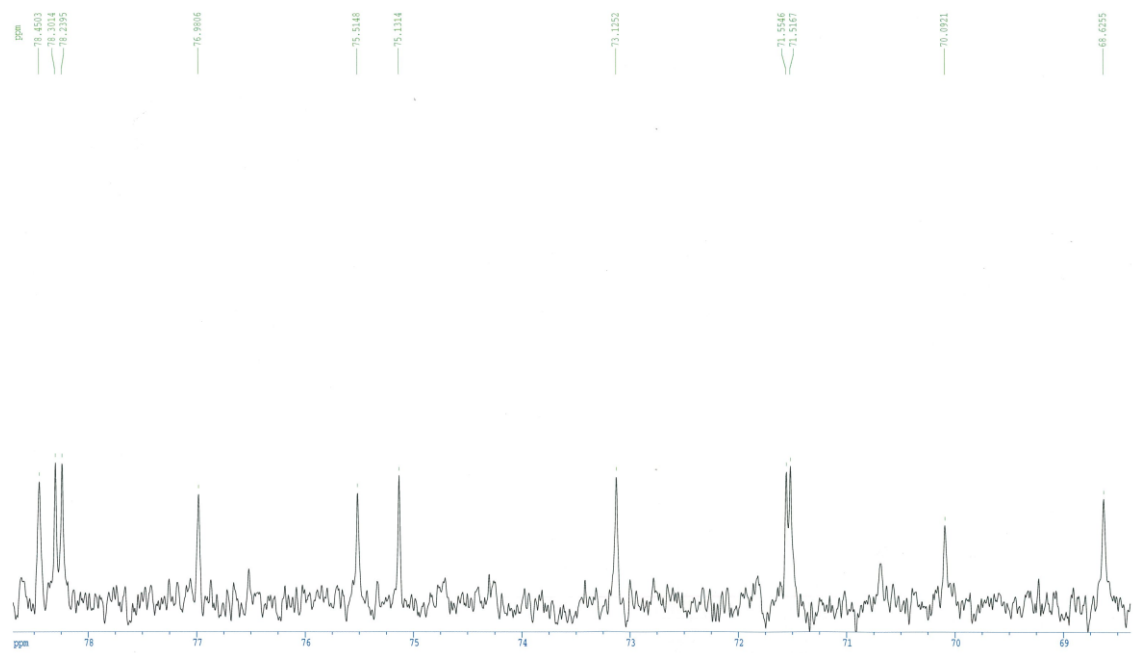

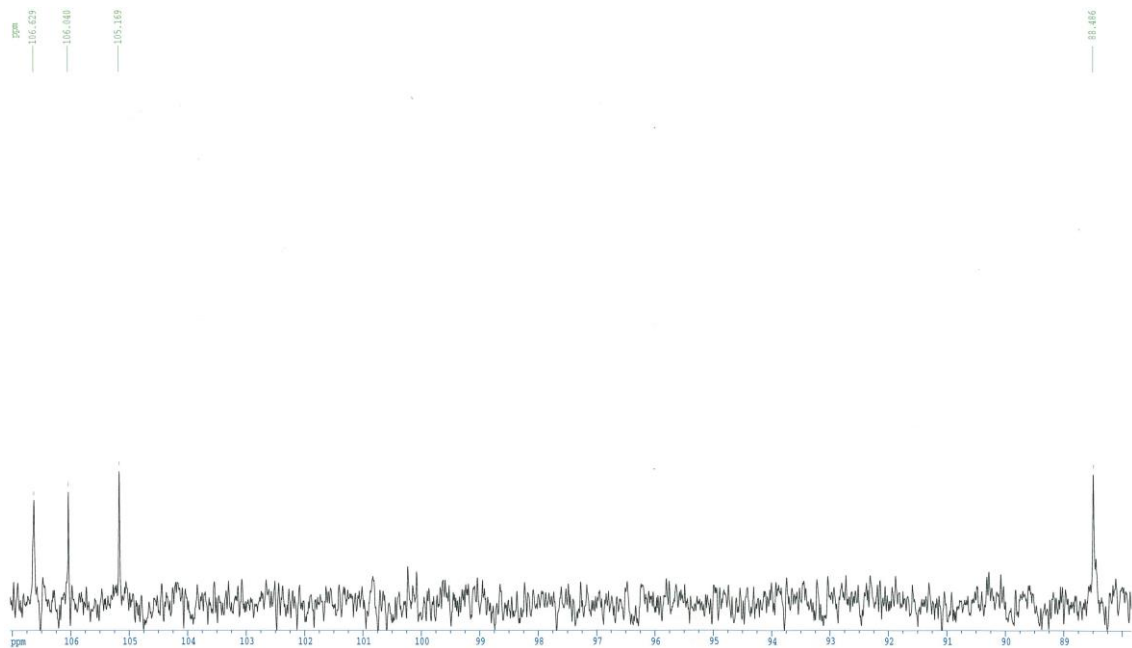

COSY spectrum of **11** in  $C_5D_5N$

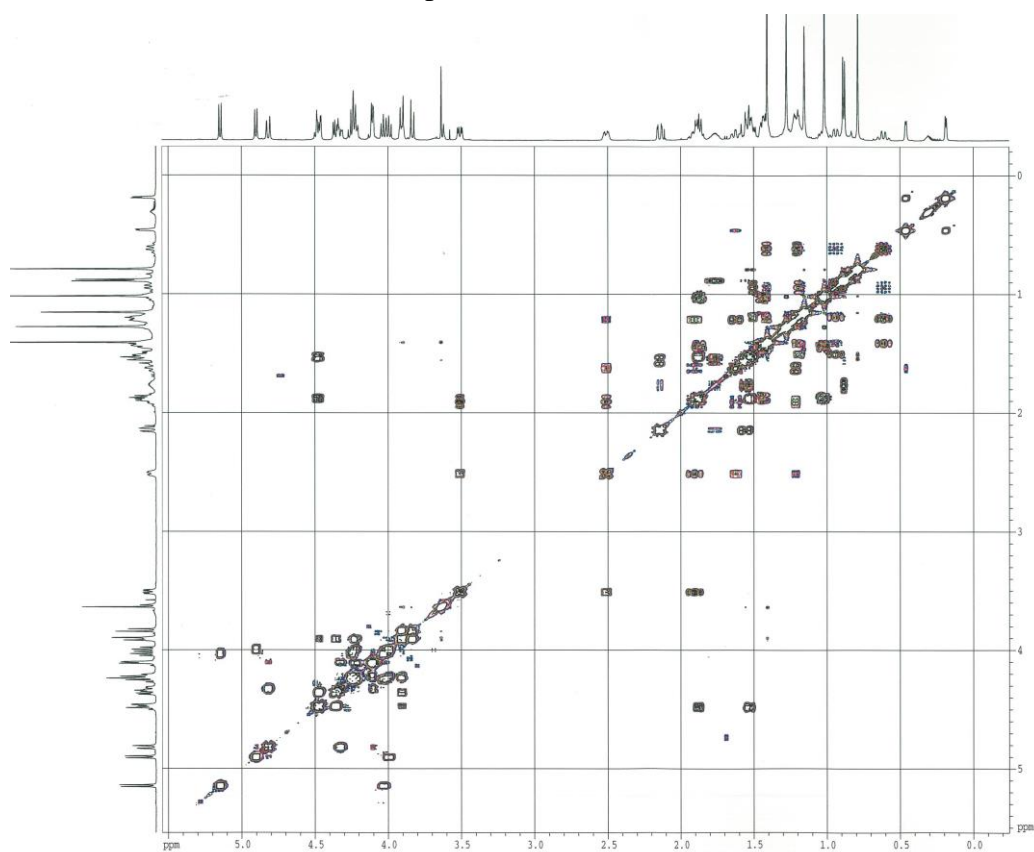

HMQC spectrum of **11** in C<sub>5</sub>D<sub>5</sub>N

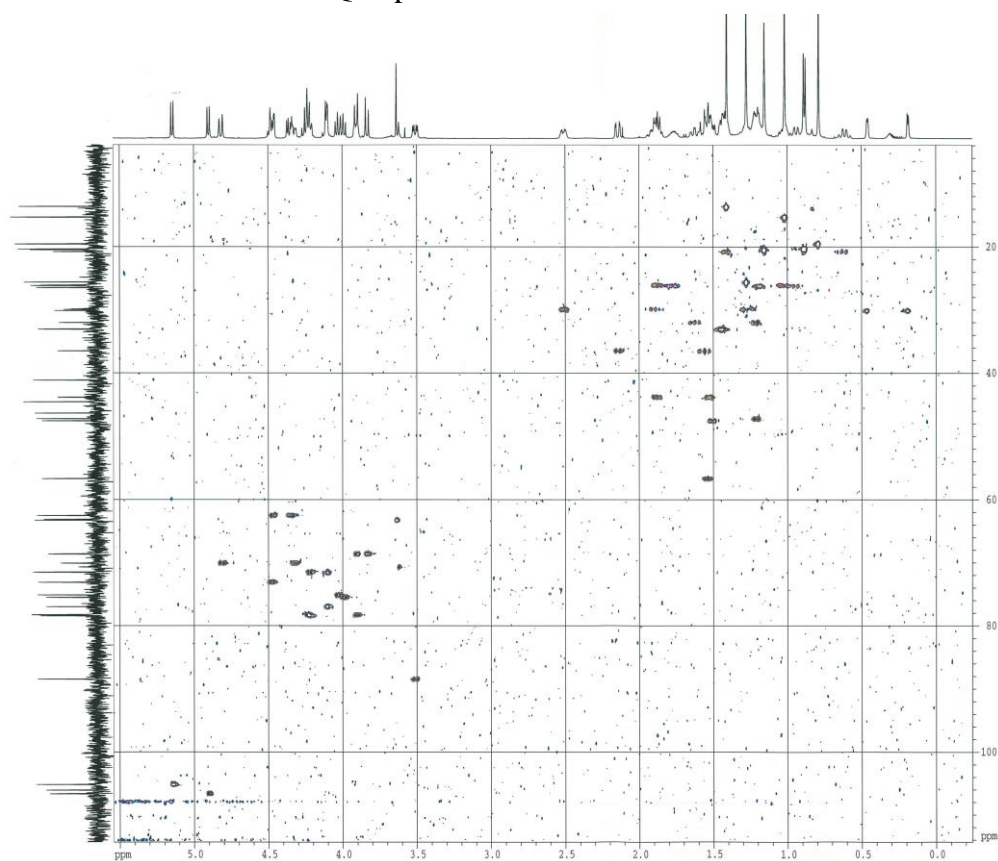

HMBC spectrum of **11** in C<sub>5</sub>D<sub>5</sub>N

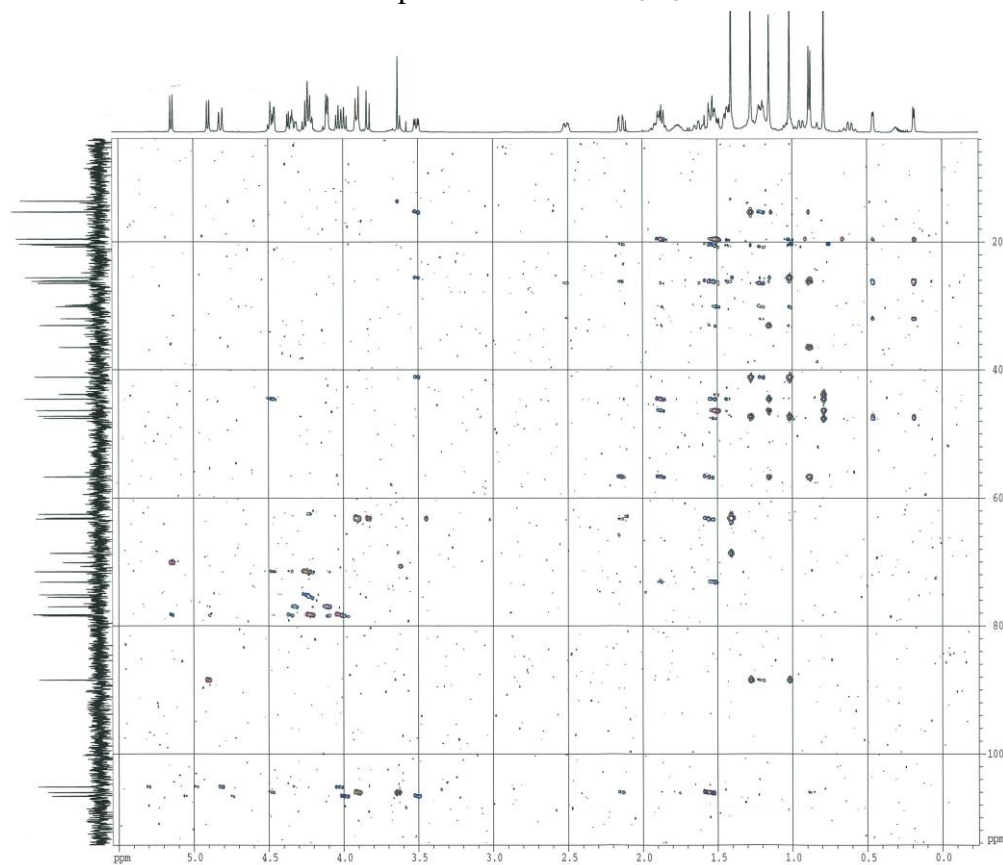





$^{13}\text{C}$ -NMR spectrum of **13** in  $\text{C}_5\text{D}_5\text{N}$

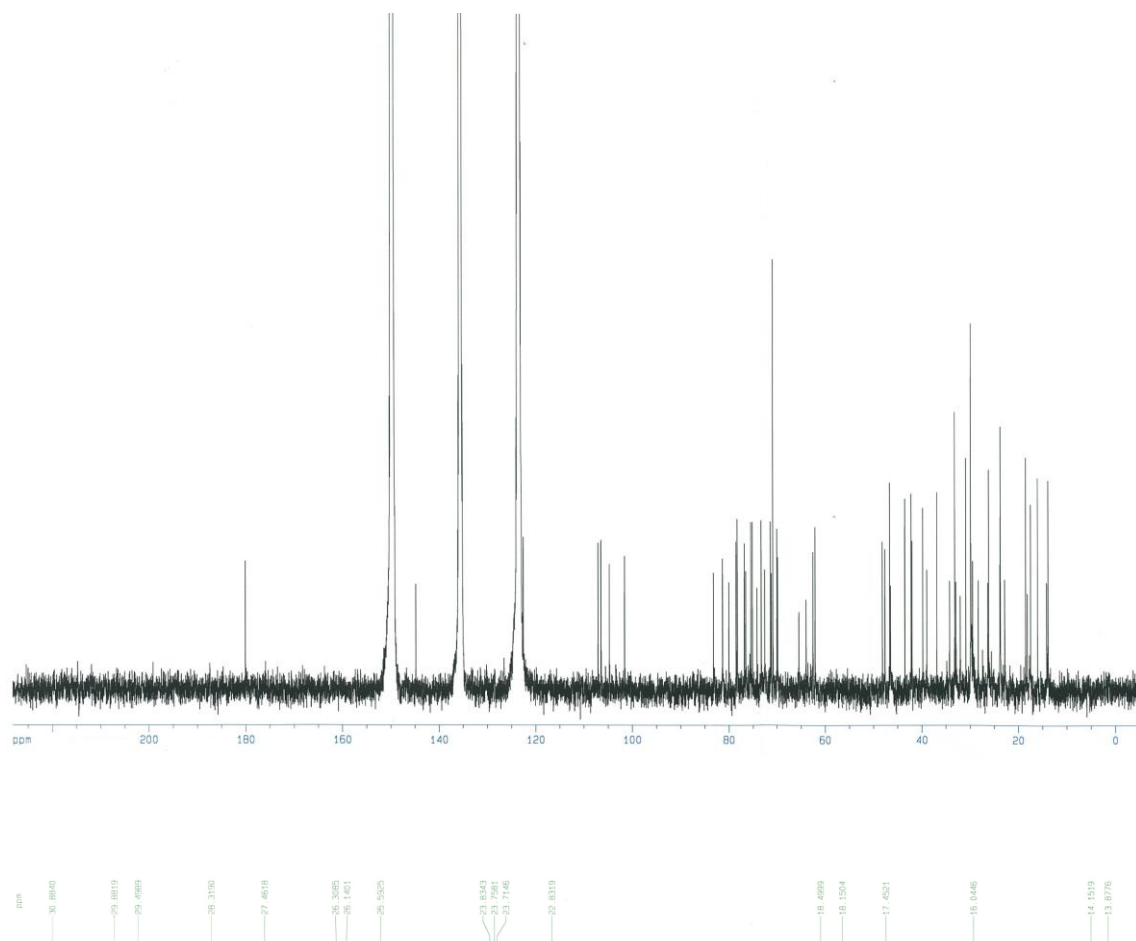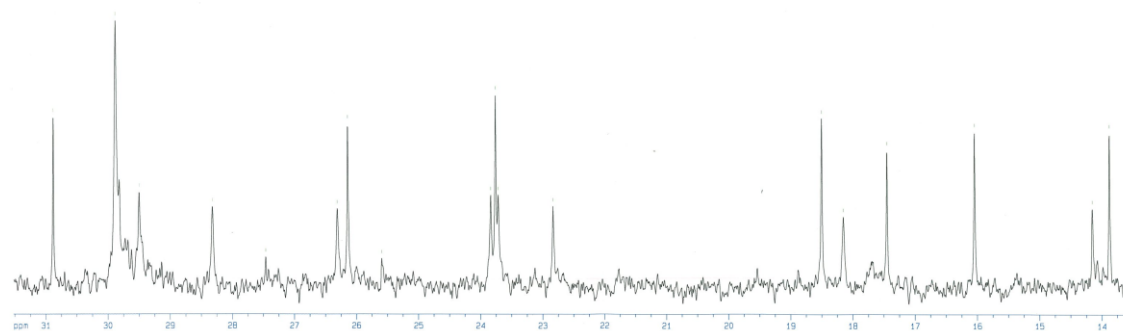

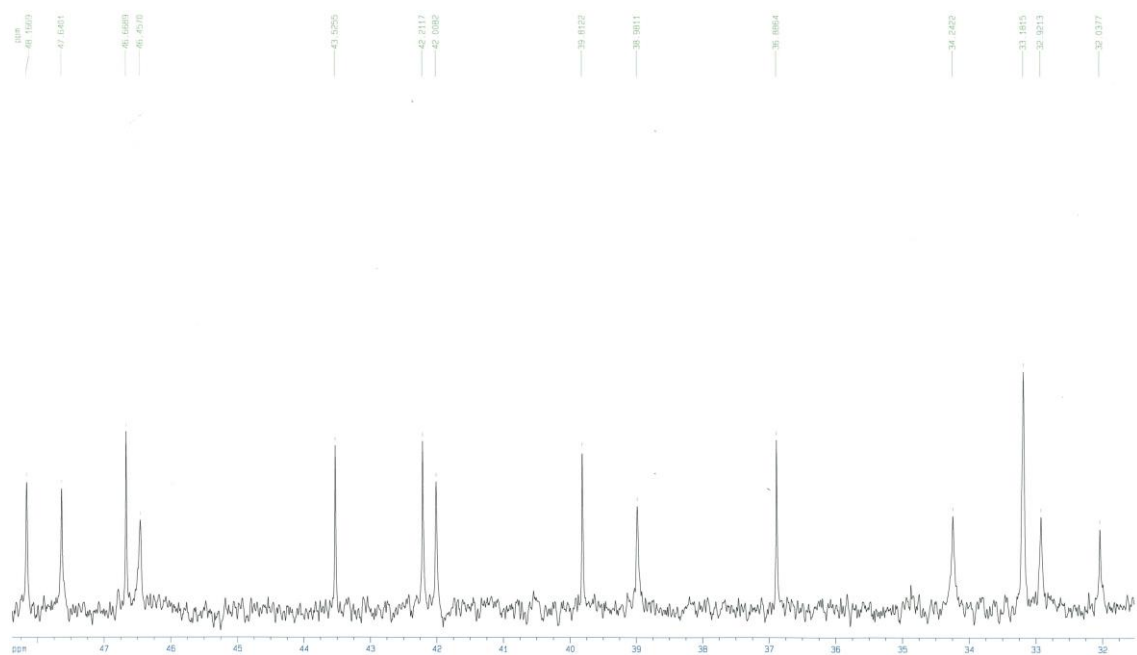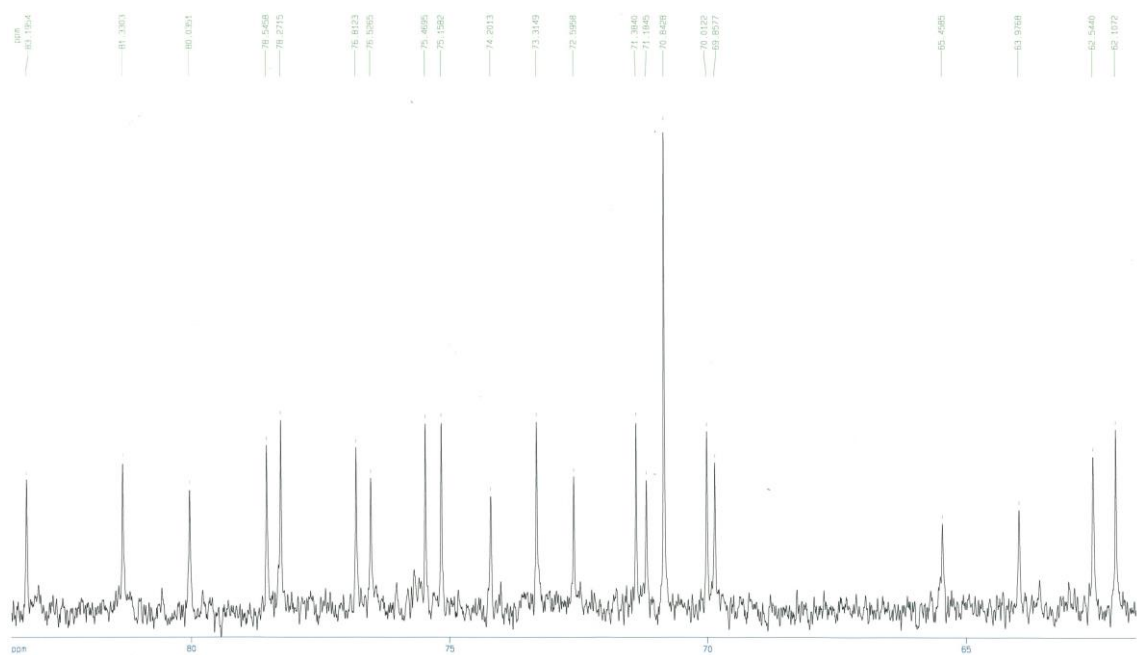

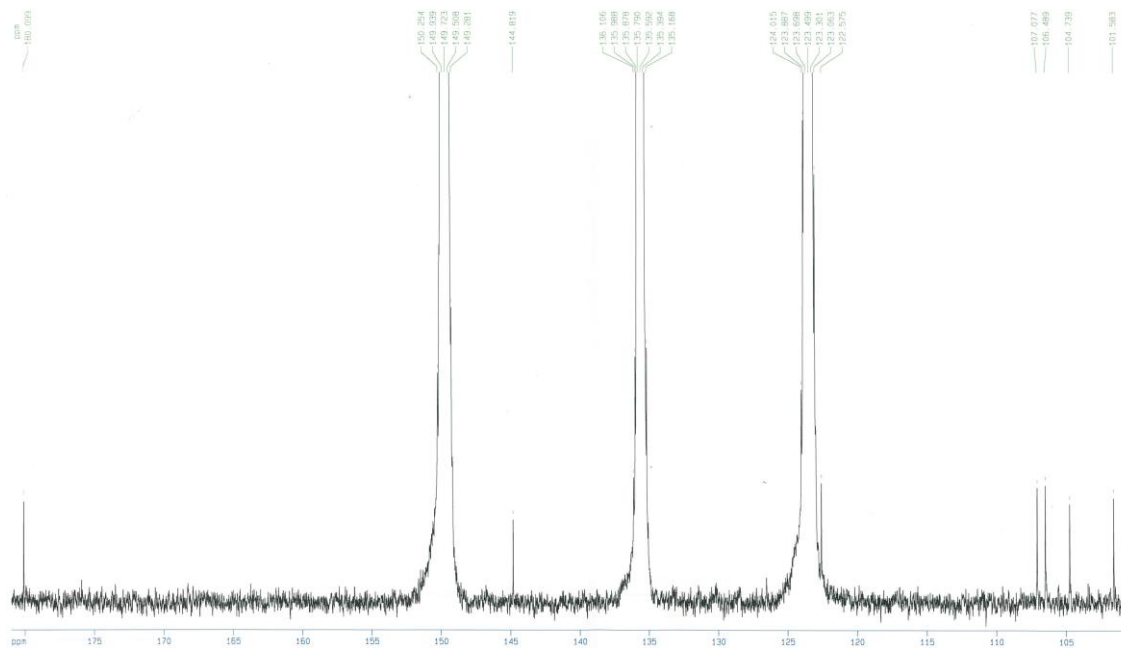

COSY spectrum of **13** in  $C_5D_5N$

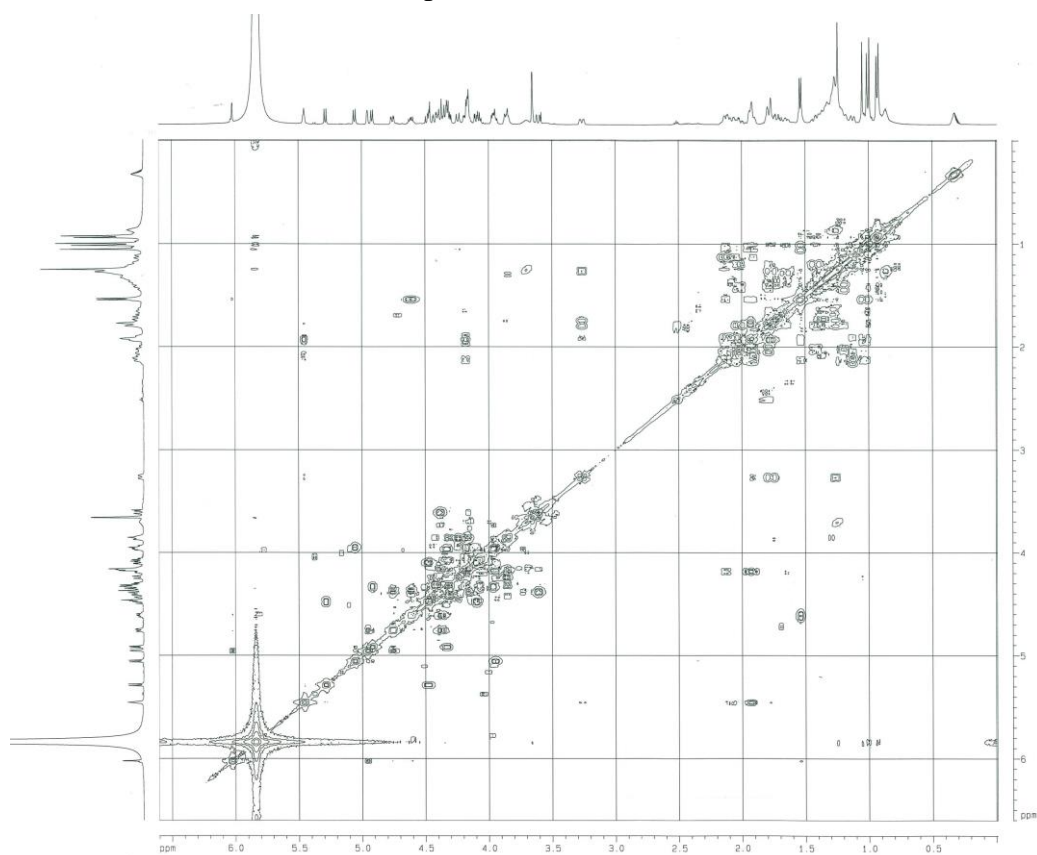



HMQC spectrum of **13** in C<sub>5</sub>D<sub>5</sub>N

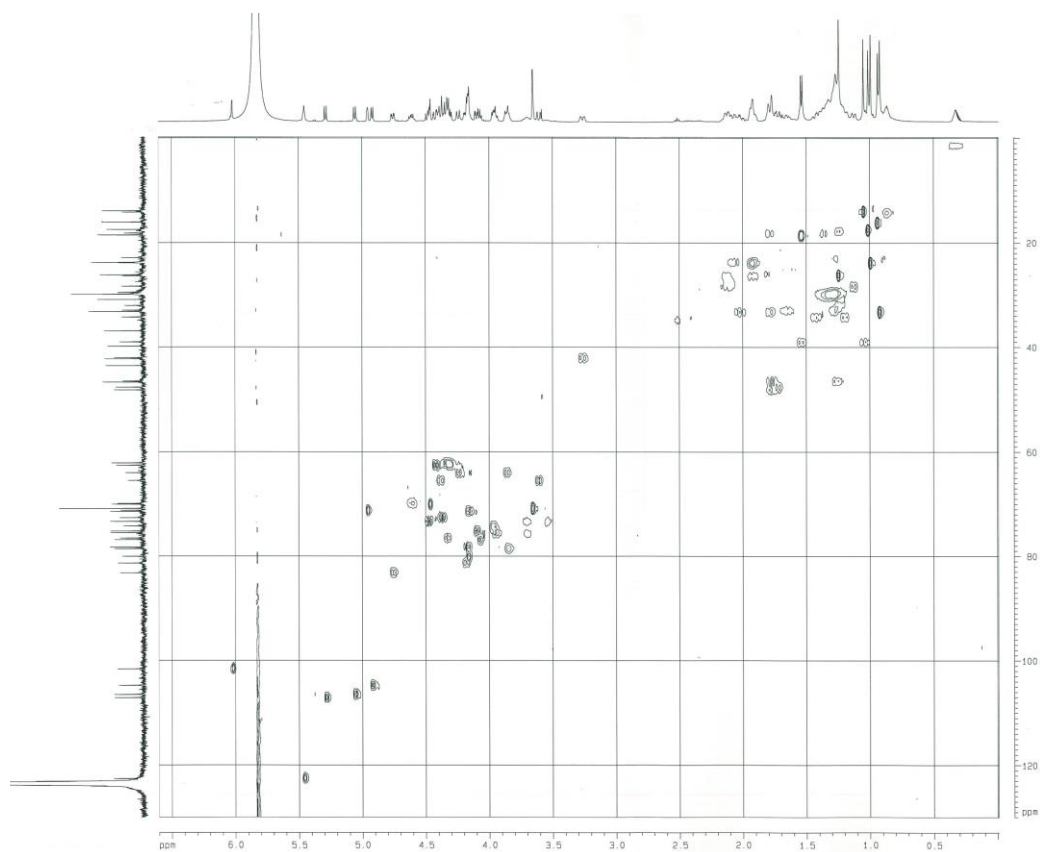

HMBC spectrum of **13** in C<sub>5</sub>D<sub>5</sub>N

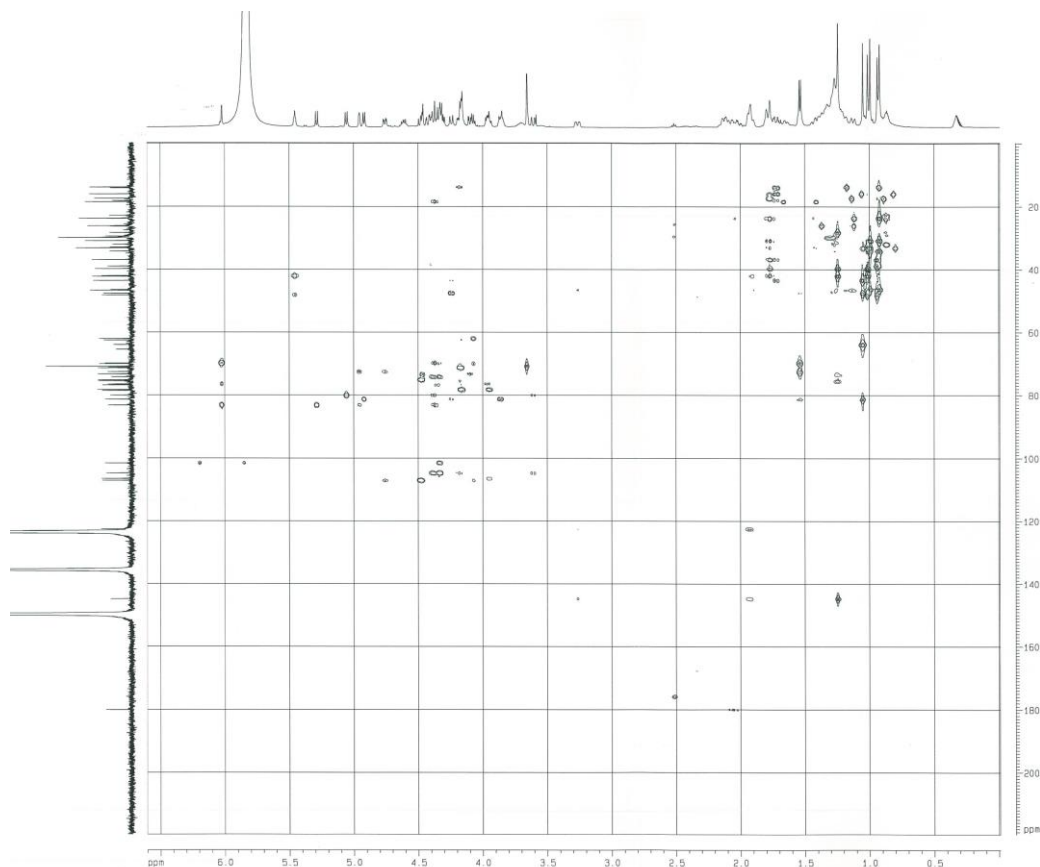

NOESY spectrum of **13** in C<sub>5</sub>D<sub>5</sub>N

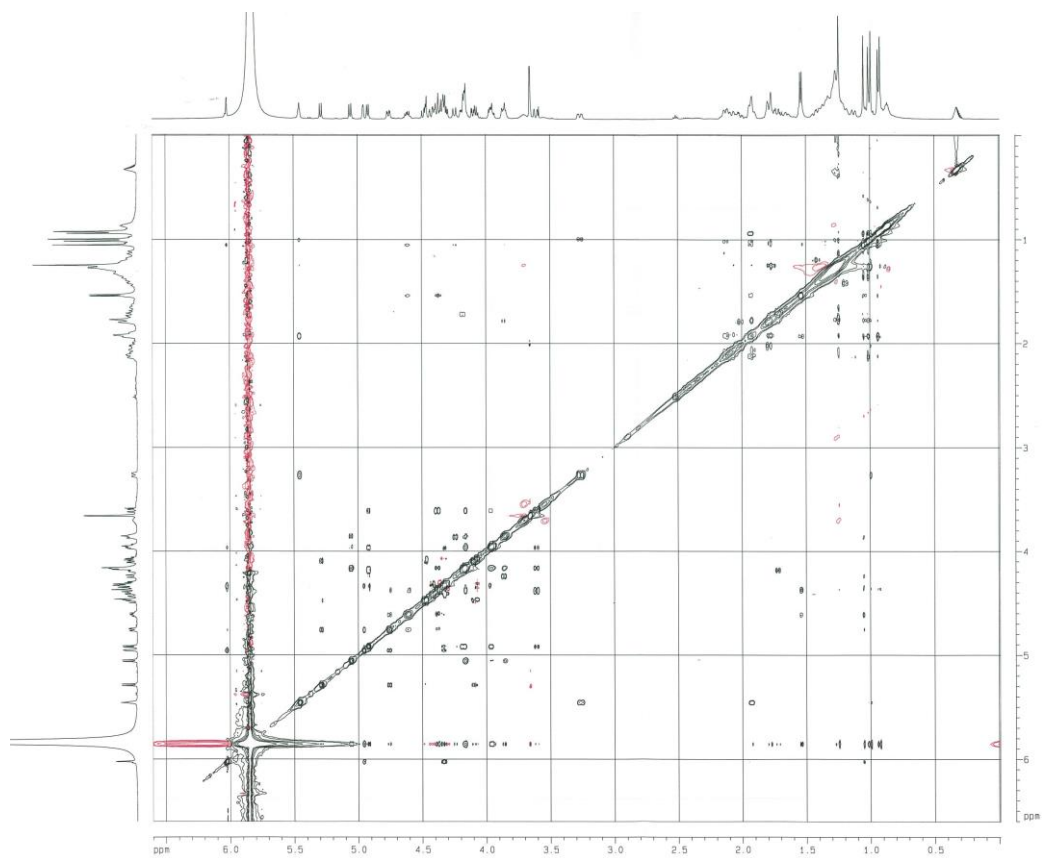

Supplement: s1 [file s1]
